# Supplementary material for: Association between microenvironment‐related genes and prognosis of primary central nervous system lymphoma
Source: PubMed Central journal article supplement — EJHaem. 2024 Nov 14;5(6):1201–14. doi: 10.1002/jha2.1046 (PMC11647707; doi:10.1002/jha2.1046), 2024-11-14
Supplement: JHA2-5-1201-s001.pdf [file JHA2-5-1201-s001.pdf]

**Supplementary Table 7. Mutations in 12 genes identified by targeted sequencing of 30 PCNSL specimens in the discovery cohort.**

|       | Gene ID | Chrom | Position   | Ref     | Variant | RefSeq    | cDNA Change         | Protein Change | Frequency |
|-------|---------|-------|------------|---------|---------|-----------|---------------------|----------------|-----------|
| TP102 | B2M     | chr15 | 45007672   | C       | A       | NM_004048 | c.C119A             | p.S40*         | 74.9      |
| TP105 | B2M     | chr15 | 45003745   | A       | T       | NM_004048 | c.1A>T              | p.M1?          | 41.2      |
| TP105 | B2M     | chr15 | 45003786.4 | TCTT    | -       | NM_004048 | c.42_45delTCTT      | p.S16fs        | 37.5      |
| TP49  | B2M     | chr15 | 45003781   | CT      | -       | NM_004048 | c.37_38del          | p.L13fs        | 44.3      |
| TP49  | B2M     | chr15 | 45007643   | C       | G       | NM_004048 | c.C90G              | p.Y30X         | 44.8      |
| T9    | BTG2    | chr1  | 203274739  | G       | A       | NM_006763 | c.G5A               | p.S2N          | 30.9      |
| T9    | BTG2    | chr1  | 203274841  | A       | C       | NM_006763 | c.A107C             | p.K36T         | 54.1      |
| TP31  | BTG2    | chr1  | 203274745  | G       | T       | NM_006763 | c.G11T              | p.G4V          | 43.5      |
| TP31  | BTG2    | chr1  | 203274761  | G       | A       | NM_006763 | c.G27A              | p.M9I          | 43.6      |
| TP31  | BTG2    | chr1  | 203274762  | C       | T       | NM_006763 | c.C28T              | p.L10F         | 36.7      |
| TP31  | BTG2    | chr1  | 203276430  | G       | C       | NM_006763 | c.G341C             | p.G114A        | 27.7      |
| TP31  | BTG2    | chr1  | 203276496  | C       | G       | NM_006763 | c.C407G             | p.T136S        | 46.2      |
| TP31  | BTG2    | chr1  | 203276551  | GGCAGT  | -       | NM_006763 | c.462_472del        | p.M154fs       | 25.4      |
| TP38  | BTG2    | chr1  | 203276441  | T       | C       | NM_006763 | c.T352C             | p.S118P        | 20.7      |
| TP43  | BTG2    | chr1  | 203274853  | G       | C       | NM_006763 | c.G119C             | p.G40A         | 20.6      |
| TP48  | BTG2    | chr1  | 203276241  | A       | G       | NM_006763 | c.A152G             | p.K51R         | 48.3      |
| TP49  | BTG2    | chr1  | 203276443  | CATCTGC | -       | NM_006763 | c.354_376del        | p.S118fs       | 15.6      |
| TP5   | BTG2    | chr1  | 203274867  | G       | A       | NM_006763 | c.G133A             | p.A45T         | 34.3      |
| TP5   | BTG2    | chr1  | 203276251  | G       | C       | NM_006763 | c.G162C             | p.W54C         | 33.5      |
| TP5   | BTG2    | chr1  | 203276344  | CGGACTC | -       | NM_006763 | c.255_264del        | p.I85fs        | 32.3      |
| TP5   | BTG2    | chr1  | 203276424  | G       | C       | NM_006763 | c.G335C             | p.R112P        | 32.6      |
| TP5   | BTG2    | chr1  | 203276427  | T       | -       | NM_006763 | c.338delT           | p.L113fs       | 32.5      |
| TP77  | BTG2    | chr1  | 203276344  | CGGACTC | -       | NM_006763 | c.255_264del        | p.I85fs        | 13.5      |
| TP77  | BTG2    | chr1  | 203276424  | G       | C       | NM_006763 | c.G335C             | p.R112P        | 12.4      |
| TP77  | BTG2    | chr1  | 203276427  | T       | -       | NM_006763 | c.338delT           | p.L113fs       | 12.6      |
| TP82  | BTG2    | chr1  | 203276344  | CGGACTC | -       | NM_006763 | c.255_264del        | p.I85fs        | 12.3      |
| TP82  | BTG2    | chr1  | 203276424  | G       | C       | NM_006763 | c.G335C             | p.R112P        | 12.6      |
| TP82  | BTG2    | chr1  | 203276427  | T       | -       | NM_006763 | c.338delT           | p.L113fs       | 13.0      |
| TP90  | BTG2    | chr1  | 203274862  | A       | G       | NM_006763 | c.A128G             | p.Q43R         | 69.1      |
| TP98  | BTG2    | chr1  | 203274761  | G       | A       | NM_006763 | c.G27A              | p.M9I          | 28.0      |
| T2    | CARD11  | chr7  | 2977652    | CTT     | -       | NM_032415 | c.1030_1032del      | p.344_344del   | 33.6      |
| TP102 | CARD11  | chr7  | 2979559    | C       | T       | NM_032415 | c.C687T             | p.D230N        | 44.4      |
| TP106 | CARD11  | chr7  | 2979559    | C       | T       | NM_032415 | c.C687T             | p.D230N        | 68.8      |
| TP42  | CARD11  | chr7  | 2984147    | G       | A       | NM_032415 | c.C383T             | p.T128M        | 82.2      |
| TP42  | CARD11  | chr7  | 2985518    | T       | A       | NM_032415 | c.A293T             | p.Y98F         | 79.4      |
| TP81  | CARD11  | chr7  | 2978320    | C       | T       | NM_032415 | c.G1010A            | p.R337Q        | 44.8      |
| TP81  | CARD11  | chr7  | 2983994    | C       | T       | NM_032415 | c.G536A             | p.R179Q        | 39.5      |
| T2    | CD79B   | chr17 | 62006799   | A       | G       | NM_000626 | c.T586C             | p.Y196H        | 32.5      |
| T8    | CD79B   | chr17 | 62006795   | T       | C       | NM_000626 | c.A590G             | p.E197G        | 12.1      |
| TP100 | CD79B   | chr17 | 62006798   | T       | C       | NM_000626 | c.A587G             | p.Y196C        | 58.3      |
| TP105 | CD79B   | chr17 | 62006798   | T       | G       | NM_000626 | c.A587C             | p.Y196S        | 9.1       |
| TP106 | CD79B   | chr17 | 62006798   | T       | G       | NM_000626 | c.A587C             | p.Y196S        | 48.9      |
| TP12  | CD79B   | chr17 | 62006798   | T       | G       | NM_000626 | c.A587C             | p.Y196S        | 43.3      |
| TP31  | CD79B   | chr17 | 62006798   | T       | G       | NM_000626 | c.A587C             | p.Y196S        | 37.1      |
| TP36  | CD79B   | chr17 | 62006798   | T       | G       | NM_000626 | c.A587C             | p.Y196S        | 47.4      |
| TP38  | CD79B   | chr17 | 62006798   | T       | A       | NM_000626 | c.A587T             | p.Y196F        | 40.1      |
| TP42  | CD79B   | chr17 | 62006798   | T       | C       | NM_000626 | c.A587G             | p.Y196C        | 39.6      |
| TP43  | CD79B   | chr17 | 62006799   | A       | C       | NM_000626 | c.T586G             | p.Y196D        | 47.3      |
| TP49  | CD79B   | chr17 | 62006663   | C       | G       | NM_000626 | c.G613C             | p.A205P        | 46.3      |
| TP49  | CD79B   | chr17 | 62006828   | C       | G       | NM_000626 | c.G557C             | p.S186T        | 48.2      |
| TP49  | CD79B   | chr17 | 62008745   | G       | A       | NM_000626 | c.C71T              | p.A24V         | 44.2      |
| TP5   | CD79B   | chr17 | 62006798   | T       | A       | NM_000626 | c.A587T             | p.Y196F        | 61.7      |
| TP53  | CD79B   | chr17 | 62006799   | A       | G       | NM_000626 | c.T586C             | p.Y196H        | 57.0      |
| TP82  | CD79B   | chr17 | 62006799   | A       | C       | NM_000626 | c.T586G             | p.Y196D        | 23.9      |
| TP94  | CD79B   | chr17 | 62006602   | T       | C       | NM_000626 | c.A677G             | p.H225R        | 37.3      |
| TP94  | CD79B   | chr17 | 62006825   | T       | A       | NM_000626 | c.A560T             | p.K187M        | 31.3      |
| TP94  | CD79B   | chr17 | 62006797.6 | GT      | AG      | NM_000626 | c.587_588delACinsCT | p.Y196S        | 32.4      |
| T2    | MYD88   | chr3  | 38182641   | T       | C       | NM_002468 | c.T794C             | p.L265P        | 31.8      |
| T4    | MYD88   | chr3  | 38182641   | T       | C       | NM_002468 | c.T794C             | p.L265P        | 49.2      |
| T9    | MYD88   | chr3  | 38182641   | T       | C       | NM_002468 | c.T794C             | p.L265P        | 34.1      |
| TP100 | MYD88   | chr3  | 38182641   | T       | C       | NM_002468 | c.T794C             | p.L265P        | 69.5      |
| TP102 | MYD88   | chr3  | 38182641   | T       | C       | NM_002468 | c.T794C             | p.L265P        | 35.7      |
| TP104 | MYD88   | chr3  | 38182641   | T       | C       | NM_002468 | c.T794C             | p.L265P        | 75.2      |
| TP105 | MYD88   | chr3  | 38182337   | C       | T       | NM_002468 | c.C773T             | p.P258L        | 28.0      |
| TP105 | MYD88   | chr3  | 38182638   | G       | A       | NM_002468 | c.G791A             | p.R272Q        | 36.1      |
| TP106 | MYD88   | chr3  | 38182641   | T       | C       | NM_002468 | c.T794C             | p.L265P        | 47.3      |
| TP110 | MYD88   | chr3  | 38182292   | G       | A       | NM_002468 | c.G728A             | p.S243N        | 67.4      |
| TP12  | MYD88   | chr3  | 38182641   | T       | C       | NM_002468 | c.T794C             | p.L265P        | 40.0      |

|       |         |      |           |        |   |           |              |              |      |
|-------|---------|------|-----------|--------|---|-----------|--------------|--------------|------|
| TP31  | MYD88   | chr3 | 38182641  | T      | C | NM_002468 | c.T794C      | p.L265P      | 38.2 |
| TP35  | MYD88   | chr3 | 38182292  | G      | A | NM_002468 | c.G728A      | p.S243N      | 76.5 |
| TP36  | MYD88   | chr3 | 38182641  | T      | C | NM_002468 | c.T794C      | p.L265P      | 69.2 |
| TP38  | MYD88   | chr3 | 38182337  | C      | T | NM_002468 | c.C773T      | p.P258L      | 25.4 |
| TP38  | MYD88   | chr3 | 38182641  | T      | C | NM_002468 | c.T794C      | p.L265P      | 21.6 |
| TP42  | MYD88   | chr3 | 38182641  | T      | C | NM_002468 | c.T794C      | p.L265P      | 39.2 |
| TP46  | MYD88   | chr3 | 38182641  | T      | C | NM_002468 | c.T794C      | p.L265P      | 36.5 |
| TP48  | MYD88   | chr3 | 38182641  | T      | C | NM_002468 | c.T794C      | p.L265P      | 43.1 |
| TP49  | MYD88   | chr3 | 38182337  | C      | T | NM_002468 | c.C773T      | p.P258L      | 44.6 |
| TP53  | MYD88   | chr3 | 38182641  | T      | C | NM_002468 | c.T794C      | p.L265P      | 44.3 |
| TP77  | MYD88   | chr3 | 38182641  | T      | C | NM_002468 | c.T794C      | p.L265P      | 34.3 |
| TP80  | MYD88   | chr3 | 38182641  | T      | C | NM_002468 | c.T794C      | p.L265P      | 51.5 |
| TP81  | MYD88   | chr3 | 38182641  | T      | C | NM_002468 | c.T794C      | p.L265P      | 44.2 |
| TP82  | MYD88   | chr3 | 38182641  | T      | C | NM_002468 | c.T794C      | p.L265P      | 46.6 |
| TP90  | MYD88   | chr3 | 38182641  | T      | C | NM_002468 | c.T794C      | p.L265P      | 32.2 |
| TP94  | MYD88   | chr3 | 38182641  | T      | C | NM_002468 | c.T794C      | p.L265P      | 62.6 |
| TP98  | MYD88   | chr3 | 38182641  | T      | C | NM_002468 | c.T794C      | p.L265P      | 77.7 |
| T2    | PIM1    | chr6 | 37138624  | A      | C | NM_002648 | c.A158C      | p.Y53S       | 43.9 |
| T2    | PIM1    | chr6 | 37138769  | C      | G | NM_002648 | c.C202G      | p.H68D       | 35.3 |
| T2    | PIM1    | chr6 | 37138950  | G      | C | NM_002648 | c.G290C      | p.S97T       | 31.0 |
| T2    | PIM1    | chr6 | 37138968  | T      | G | NM_002648 | c.T308G      | p.V103G      | 30.7 |
| T2    | PIM1    | chr6 | 37139039  | C      | G | NM_002648 | c.C379G      | p.Q127E      | 30.6 |
| T4    | PIM1    | chr6 | 37138945  | G      | T | NM_002648 | c.G285T      | p.K95N       | 79.5 |
| T8    | PIM1    | chr6 | 37138769  | C      | A | NM_002648 | c.C202A      | p.H68N       | 9.2  |
| TP100 | PIM1    | chr6 | 37138804  | G      | C | NM_002648 | c.G237C      | p.E79D       | 33.0 |
| TP100 | PIM1    | chr6 | 37139039  | C      | G | NM_002648 | c.C379G      | p.Q127E      | 29.2 |
| TP102 | PIM1    | chr6 | 37138804  | G      | C | NM_002648 | c.G237C      | p.E79D       | 43.2 |
| TP105 | PIM1    | chr6 | 37138782  | A      | G | NM_002648 | c.A215G      | p.A72G       | 35.7 |
| TP105 | PIM1    | chr6 | 37138805  | C      | G | NM_002648 | c.C238G      | p.L80V       | 43.9 |
| TP105 | PIM1    | chr6 | 37139097  | G      | A | NM_002648 | c.G437A      | p.S146N      | 44.8 |
| TP29  | PIM1    | chr6 | 37138919  | C      | T | NM_002648 | c.C259T      | p.P87S       | 26.1 |
| TP29  | PIM1    | chr6 | 37138946  | G      | T | NM_002648 | c.G286T      | p.V96L       | 38.1 |
| TP31  | PIM1    | chr6 | 37140805  | G      | A | NM_002648 | c.G641A      | p.R214H      | 83.2 |
| TP31  | PIM1    | chr6 | 37140885  | C      | G | NM_002648 | c.C721G      | p.P241A      | 88.5 |
| TP31  | PIM1    | chr6 | 37140921  | G      | A | NM_002648 | c.G757A      | p.V253I      | 87.1 |
| TP35  | PIM1    | chr6 | 37139097  | G      | A | NM_002648 | c.G437A      | p.S146N      | 43.1 |
| TP38  | PIM1    | chr6 | 37138769  | C      | T | NM_002648 | c.C202T      | p.H68T       | 65.6 |
| TP38  | PIM1    | chr6 | 37139150  | C      | G | NM_002648 | c.C490G      | p.L164V      | 13.7 |
| TP38  | PIM1    | chr6 | 37139150  | C      | T | NM_002648 | c.C490T      | p.L164F      | 41.7 |
| TP43  | PIM1    | chr6 | 37139033  | C      | T | NM_002648 | c.C373T      | p.P125S      | 59.6 |
| TP46  | PIM1    | chr6 | 37138630  | G      | A | NM_002648 | c.G164A      | p.G55D       | 29.6 |
| TP46  | PIM1    | chr6 | 37138950  | G      | C | NM_002648 | c.G290C      | p.S97T       | 22.2 |
| TP48  | PIM1    | chr6 | 37138760  | G      | C | NM_002648 | c.G193C      | p.A65P       | 45.4 |
| TP48  | PIM1    | chr6 | 37138802  | G      | C | NM_002648 | c.G235C      | p.E79Q       | 36.7 |
| TP48  | PIM1    | chr6 | 37139039  | C      | T | NM_002648 | c.C379T      | p.Q127X      | 76.4 |
| TP49  | PIM1    | chr6 | 37138955  | G      | A | NM_002648 | c.G295A      | p.G99S       | 84.4 |
| TP5   | PIM1    | chr6 | 37141811  | C      | T | NM_002648 | c.C886T      | p.P296S      | 31.0 |
| TP5   | PIM1    | chr6 | 37141821  | C      | T | NM_002648 | c.C896T      | p.T299I      | 30.7 |
| TP53  | PIM1    | chr6 | 37139037  | TGC    | - | NM_002648 | c.377_379del | p.126_127del | 83.6 |
| TP77  | PIM1    | chr6 | 37138777  | G      | C | NM_002648 | c.G210C      | p.E70D       | 21.5 |
| TP77  | PIM1    | chr6 | 37139111  | G      | A | NM_002648 | c.G451A      | p.V151M      | 46.0 |
| TP77  | PIM1    | chr6 | 37139150  | C      | T | NM_002648 | c.C490T      | p.L164F      | 42.9 |
| TP77  | PIM1    | chr6 | 37141718  | C      | T | NM_002648 | c.C793T      | p.H265Y      | 39.0 |
| TP80  | PIM1    | chr6 | 37138603  | G      | A | NM_002648 | c.G137A      | p.S46N       | 22.4 |
| TP82  | PIM1    | chr6 | 37139097  | G      | C | NM_002648 | c.G437C      | p.S146T      | 26.3 |
| TP90  | PIM1    | chr6 | 37139061  | C      | T | NM_002648 | c.C401T      | p.T134M      | 82.9 |
| TP90  | PIM1    | chr6 | 37139150  | C      | T | NM_002648 | c.C490T      | p.L164F      | 61.9 |
| TP90  | PIM1    | chr6 | 37141731  | G      | A | NM_002648 | c.G806A      | p.W269*      | 71.1 |
| TP94  | PIM1    | chr6 | 37138804  | G      | - | NM_002648 | c.G237del    | p.Glu79fs    | 26.6 |
| TP98  | PIM1    | chr6 | 37138600  | G      | A | NM_002648 | c.G134A      | p.G45D       | 24.6 |
| TP98  | PIM1    | chr6 | 37138800  | G      | A | NM_002648 | c.G233A      | p.G78G       | 43.4 |
| TP98  | PIM1    | chr6 | 37138804  | G      | C | NM_002648 | c.G237C      | p.E79D       | 44.1 |
| TP98  | PIM1    | chr6 | 37139039  | C      | T | NM_002648 | c.C379T      | p.Q127X      | 45.8 |
| TP98  | PIM1    | chr6 | 37139073  | C      | T | NM_002648 | c.C413T      | p.A138V      | 61.8 |
| TP98  | PIM1    | chr6 | 37139098  | C      | A | NM_002648 | c.C438A      | p.S146R      | 62.1 |
| TP29  | PRDM1   | chr6 | 106536269 | C      | T | NM_001198 | c.C236T      | p.A79V       | 52.4 |
| TP48  | PRDM1   | chr6 | 106536317 | GTGAAG | - | NM_001198 | c.284_291del | p.S95fs      | 47.7 |
| TP77  | PRDM1   | chr6 | 106553791 | C      | T | NM_001198 | c.C1756T     | p.Q586X      | 43.5 |
| T4    | PRKCD   | chr3 | 53221366  | G      | A | NM_006254 | c.G1363A     | p.A455T      | 88.7 |
| T2    | TBL1XR1 | chr3 | 176756104 | A      | T | NM_024665 | c.T1044A     | p.H348Q      | 29.4 |
| TP102 | TBL1XR1 | chr3 | 176750916 | A      | G | NM_024665 | c.T1259C     | p.F420S      | 42.7 |
| TP36  | TBL1XR1 | chr3 | 176750794 | A      | G | NM_024665 | c.T1381C     | p.S461P      | 39.1 |

|       |         |      |           |        |   |           |            |            |      |
|-------|---------|------|-----------|--------|---|-----------|------------|------------|------|
| TP49  | TBL1XR1 | chr3 | 176763973 | G      | C | NM_024665 | c.C869G    | p.T290R    | 91.3 |
| TP5   | TBL1XR1 | chr3 | 176765300 | C      | T | NM_024665 | c.G740A    | p.G247E    | 31.5 |
| TP100 | TMEM30A | chr6 | 75977425  | T      | A | NM_018247 | c.A277T    | p.K93*     | 58.4 |
| TP105 | TMEM30A | chr6 | 75969072  | G      | A | NM_018247 | c.C676T    | p.R226*    | 46.8 |
| TP38  | TNFAIP3 | chr6 | 138200015 | G      | A | NM_006290 | c.G1433A   | p.C478Y    | 51.3 |
| TP43  | TNFAIP3 | chr6 | 138202351 | C      | - | NM_006290 | c.2268delC | p.D756fs   | 97.5 |
| TP53  | TNFAIP3 | chr6 | 138195987 | G      | A | NM_006290 | c.G301A    | p.G101S    | 36.0 |
| TP102 | TOX     | chr8 | 60031457  | G      | C | NM_014729 | c.C90G     | p.Y30*     | 74.9 |
| TP104 | TOX     | chr8 | 60031445  | C      | G | NM_014729 | c.G102A    | p.K34N     | 45.6 |
| TP5   | TOX     | chr8 | 59720716  | G      | T | NM_014729 | c.C1505A   | p.P502Q    | 48.6 |
| TP77  | TOX     | chr8 | 60031465  | CCAGGC | - | NM_014729 | c.65_82del | p.22_28del | 34.1 |
| TP98  | TOX     | chr8 | 60031546  | T      | A | NM_014729 | c.A1T      | p.M1?      | 47.4 |
