# Supplementary material for: Association between microenvironment‐related genes and prognosis of primary central nervous system lymphoma
Source: PubMed Central journal article supplement — EJHaem. 2024 Nov 14;5(6):1201–14. doi: 10.1002/jha2.1046 (PMC11647707; doi:10.1002/jha2.1046), 2024-11-14
Supplement: JHA2-5-1201-s002.pdf [file JHA2-5-1201-s002.pdf]

**Supplemental Table 5. Cellular targets of the antibodies used in this study**

| Gene (protein)         | Cellular target    | Supplier | Cat #    | Notes                                       | Reference                                                                                                                              |
|------------------------|--------------------|----------|----------|---------------------------------------------|----------------------------------------------------------------------------------------------------------------------------------------|
| <i>TUBB4A</i> (TUBB4A) | Oligodendrocyte    | Abcam    | ab179509 | Prognostic proteins in the discovery cohort | Fernández-Arjona MDM,. Fluids and barriers of the CNS. 2021                                                                            |
|                        | Reactive microglia |          |          |                                             |                                                                                                                                        |
| <i>S100B</i> (S100B)   | Astrocyte          | Abcam    | ab52642  |                                             | Adami C. Glia. 2001; Zuo et al., 2004; McMahon et al., 2008; Harding et al., 2011; Guttenplan et al., 2019                             |
|                        | Reactive microglia |          |          |                                             |                                                                                                                                        |
| <i>GFAP</i> (GFAP)     | Astrocyte          | Agilent  | IR524    | Often used as a marker of each gila cell    | Brenner et al., 1994; Zhuo et al., 2001; Su et al., 2004; Ganat et al., 2006; Liu et al.,2010; Guttenplan et al., 2019                 |
| <i>Olig2</i> (OLIG2)   | Oligodendrocyte    | IBL      | 18953    |                                             | Kolenda-Roberts et al., 2013                                                                                                           |
| <i>CD68</i> (CD68)     | Reactive microglia | Agilent  | IR609    |                                             | Pillai et al., 2009; Franke et al., 2013; Iqbal et al., 2014; Hendrickx DAE. Journal of neuroimmunology. 2017; Guttenplan et al., 2019 |
