# Supplementary material for: Association between microenvironment‐related genes and prognosis of primary central nervous system lymphoma
Source: PubMed Central journal article supplement — EJHaem. 2024 Nov 14;5(6):1201–14. doi: 10.1002/jha2.1046 (PMC11647707; doi:10.1002/jha2.1046), 2024-11-14
Supplement: JHA2-5-1201-s004.pdf [file JHA2-5-1201-s004.pdf]

**Supplemental Table 4. Differentially expressed genes between RG and NRG**

| Symbols        | p-value  | q-value | Regulation (RG/NRG) | Fold change (RG/NRG) |
|----------------|----------|---------|---------------------|----------------------|
| <i>TMEM88B</i> | 3.40E-06 | 0.00238 | up                  | 2.09                 |
| <i>ABL1</i>    | 0.000161 | 0.0141  | up                  | 0.597                |
| <i>SLC1A3</i>  | 0.000112 | 0.0141  | up                  | 1.32                 |
| <i>NLGN2</i>   | 5.86E-05 | 0.0141  | up                  | 1.35                 |
| <i>TMEM144</i> | 0.000153 | 0.0141  | up                  | 1.65                 |
| <i>PLLP</i>    | 0.000112 | 0.0141  | up                  | 1.68                 |
| <i>PADI2</i>   | 7.11E-05 | 0.0141  | up                  | 1.89                 |
| <i>PLXNB3</i>  | 0.000155 | 0.0141  | up                  | 1.89                 |
| <i>TUBB4A</i>  | 0.000203 | 0.0158  | up                  | 2.13                 |
| <i>FSCN1</i>   | 0.000354 | 0.0214  | up                  | 1.1                  |
| <i>DST</i>     | 0.000367 | 0.0214  | up                  | 1.19                 |
| <i>PMP22</i>   | 0.000336 | 0.0214  | up                  | 1.23                 |
| <i>GRM3</i>    | 0.000436 | 0.0234  | up                  | 1.73                 |
| <i>DLG4</i>    | 0.000502 | 0.0237  | up                  | 1.14                 |
| <i>SNCA</i>    | 0.000508 | 0.0237  | up                  | 1.47                 |
| <i>CCR2</i>    | 0.000676 | 0.0275  | down                | -2.14                |
| <i>RHOA</i>    | 0.000869 | 0.0275  | up                  | 0.461                |
| <i>DOCK1</i>   | 0.000689 | 0.0275  | up                  | 0.943                |
| <i>PLEKHB1</i> | 0.000899 | 0.0275  | up                  | 1.3                  |
| <i>CX3CL1</i>  | 0.000726 | 0.0275  | up                  | 1.5                  |
| <i>GJB1</i>    | 0.000846 | 0.0275  | up                  | 1.78                 |
| <i>MAPT</i>    | 0.000905 | 0.0275  | up                  | 2.07                 |
| <i>GPR62</i>   | 0.000806 | 0.0275  | up                  | 2.2                  |
| <i>DICER1</i>  | 0.00124  | 0.0281  | up                  | 0.384                |
| <i>CTSF</i>    | 0.00122  | 0.0281  | up                  | 1.16                 |
| <i>ERBB3</i>   | 0.00117  | 0.0281  | up                  | 1.33                 |
| <i>BOK</i>     | 0.00101  | 0.0281  | up                  | 1.35                 |
| <i>MAG</i>     | 0.00125  | 0.0281  | up                  | 1.71                 |
| <i>TMC7</i>    | 0.0011   | 0.0281  | up                  | 1.96                 |
| <i>PLP1</i>    | 0.00122  | 0.0281  | up                  | 2.05                 |
| <i>SYP</i>     | 0.00117  | 0.0281  | up                  | 2.12                 |
| <i>MOG</i>     | 0.00129  | 0.0283  | up                  | 2.18                 |
| <i>F3</i>      | 0.00139  | 0.0295  | up                  | 1.01                 |
| <i>GSN</i>     | 0.0015   | 0.0309  | up                  | 0.883                |
| <i>S100B</i>   | 0.00158  | 0.031   | up                  | 1.59                 |
| <i>MAL</i>     | 0.0016   | 0.031   | up                  | 1.85                 |
| <i>MYRF</i>    | 0.00183  | 0.0344  | up                  | 1.78                 |
| <i>MOBP</i>    | 0.00187  | 0.0344  | up                  | 2.36                 |
| <i>GJA1</i>    | 0.00204  | 0.0346  | up                  | 1.07                 |
| <i>CDKN1C</i>  | 0.00202  | 0.0346  | up                  | 1.5                  |
| <i>SOX10</i>   | 0.00196  | 0.0346  | up                  | 1.9                  |
| <i>AGT</i>     | 0.00208  | 0.0346  | up                  | 1.9                  |
| <i>SLC6A1</i>  | 0.0023   | 0.0373  | up                  | 1.53                 |
| <i>BCAS1</i>   | 0.00235  | 0.0373  | up                  | 1.62                 |
| <i>EMP1</i>    | 0.00255  | 0.0396  | up                  | 0.898                |
| <i>CNP</i>     | 0.00296  | 0.045   | up                  | 0.648                |
| <i>S100A10</i> | 0.00311  | 0.0462  | up                  | 0.6                  |
| <i>TREM2</i>   | 0.00333  | 0.0485  | up                  | 1.68                 |
| <i>CLSTN1</i>  | 0.00359  | 0.0513  | up                  | 0.508                |

|                |         |        |      |        |
|----------------|---------|--------|------|--------|
| <i>RAB6B</i>   | 0.00367 | 0.0513 | up   | 1.76   |
| <i>LINGO1</i>  | 0.0038  | 0.052  | up   | 1.3    |
| <i>SYN2</i>    | 0.00388 | 0.0521 | up   | 2.32   |
| <i>S1PR5</i>   | 0.00396 | 0.0522 | up   | 1.63   |
| <i>KCNJ10</i>  | 0.00453 | 0.0586 | up   | 1.34   |
| <i>ITGA7</i>   | 0.00481 | 0.0611 | up   | 1.06   |
| <i>SETD2</i>   | 0.00507 | 0.0633 | up   | 0.291  |
| <i>NGFR</i>    | 0.00517 | 0.0634 | up   | 1.4    |
| <i>SALL1</i>   | 0.00537 | 0.0648 | up   | 1.37   |
| <i>BCL2L2</i>  | 0.00565 | 0.0669 | up   | 0.473  |
| <i>P2RX7</i>   | 0.00583 | 0.0679 | up   | 0.734  |
| <i>MYORG</i>   | 0.00592 | 0.0679 | up   | 0.936  |
| <i>LFNG</i>    | 0.00624 | 0.0704 | up   | 0.918  |
| <i>CYP7B1</i>  | 0.00639 | 0.0709 | up   | 0.896  |
| <i>ITGAV</i>   | 0.00659 | 0.0719 | up   | 0.79   |
| <i>DLG1</i>    | 0.00682 | 0.0734 | up   | 0.29   |
| <i>APOE</i>    | 0.00787 | 0.0822 | up   | 0.718  |
| <i>RAPGEF3</i> | 0.00788 | 0.0822 | up   | 0.935  |
| <i>ATG5</i>    | 0.0083  | 0.0831 | down | -0.688 |
| <i>TMCC3</i>   | 0.00838 | 0.0831 | up   | 0.861  |
| <i>C4A</i>     | 0.00837 | 0.0831 | up   | 0.928  |
| <i>SHANK3</i>  | 0.00844 | 0.0831 | up   | 0.976  |
| <i>TRIM47</i>  | 0.00903 | 0.0877 | up   | 0.582  |
| <i>CYP27A1</i> | 0.00991 | 0.0949 | up   | 0.901  |
| <i>LAMP2</i>   | 0.0104  | 0.0981 | up   | 0.497  |
| <i>OPALIN</i>  | 0.0105  | 0.0981 | up   | 2      |
| <i>KDM4D</i>   | 0.0107  | 0.0984 | up   | 0.716  |
| <i>TNFSF12</i> | 0.0109  | 0.0987 | up   | 0.701  |
| <i>SOD2</i>    | 0.0112  | 0.0988 | up   | 0.454  |
| <i>GAL3ST1</i> | 0.0111  | 0.0988 | up   | 1.59   |
| <i>TGFA</i>    | 0.0115  | 0.101  | up   | 1.21   |
| <i>HSPB1</i>   | 0.0134  | 0.115  | up   | 0.707  |
| <i>BIN1</i>    | 0.0135  | 0.115  | up   | 0.793  |
| <i>AK1</i>     | 0.0146  | 0.123  | up   | 0.775  |
| <i>LAMP1</i>   | 0.0164  | 0.133  | up   | 0.358  |
| <i>LACC1</i>   | 0.0163  | 0.133  | up   | 0.64   |
| <i>NLGN1</i>   | 0.0161  | 0.133  | up   | 1.28   |
| <i>GRIN2B</i>  | 0.0169  | 0.136  | up   | 1.47   |
| <i>FOXP3</i>   | 0.0176  | 0.14   | up   | 0.948  |
| <i>IFITM3</i>  | 0.0185  | 0.145  | up   | 0.578  |
| <i>CD74</i>    | 0.0188  | 0.146  | up   | 0.389  |
| <i>LST1</i>    | 0.0195  | 0.149  | up   | 0.56   |
| <i>PLD1</i>    | 0.0199  | 0.149  | up   | 0.637  |
| <i>TIE1</i>    | 0.0197  | 0.149  | up   | 1.39   |
| <i>IL1R1</i>   | 0.0211  | 0.155  | up   | 0.791  |
| <i>GRIA2</i>   | 0.0208  | 0.155  | up   | 1.79   |
| <i>PRKAR2B</i> | 0.0216  | 0.157  | down | -1.39  |
| <i>SLC2A1</i>  | 0.0218  | 0.157  | up   | 0.464  |
| <i>PLXDC2</i>  | 0.0229  | 0.163  | up   | 0.759  |
| <i>IRF2</i>    | 0.0251  | 0.169  | down | -0.57  |
| <i>RAC2</i>    | 0.0249  | 0.169  | down | -0.409 |
| <i>KDM4A</i>   | 0.0247  | 0.169  | up   | 0.283  |
| <i>GNA15</i>   | 0.0248  | 0.169  | up   | 0.585  |

|          |        |       |      |        |
|----------|--------|-------|------|--------|
| JAM2     | 0.0251 | 0.169 | up   | 0.755  |
| ST3GAL6  | 0.0246 | 0.169 | up   | 0.986  |
| ALDH1L1  | 0.0254 | 0.169 | up   | 1.78   |
| PACSN1   | 0.0263 | 0.173 | up   | 1.63   |
| PIK3CB   | 0.0271 | 0.176 | up   | 0.252  |
| MRE11    | 0.0276 | 0.176 | up   | 0.268  |
| CASP4    | 0.0274 | 0.176 | up   | 0.335  |
| DDX58    | 0.0276 | 0.176 | up   | 0.512  |
| TGFBR1   | 0.0287 | 0.179 | up   | 0.484  |
| PINK1    | 0.0285 | 0.179 | up   | 0.586  |
| PRKACB   | 0.0303 | 0.184 | up   | 0.594  |
| MGMT     | 0.03   | 0.184 | up   | 0.906  |
| RSAD2    | 0.0299 | 0.184 | up   | 0.993  |
| BNIP3L   | 0.0311 | 0.186 | up   | 0.312  |
| CD84     | 0.0311 | 0.186 | up   | 0.631  |
| PTGER4   | 0.0319 | 0.186 | up   | 0.656  |
| ISLR2    | 0.0314 | 0.186 | up   | 0.857  |
| ENPP6    | 0.0317 | 0.186 | up   | 1.18   |
| UGT8     | 0.0327 | 0.187 | up   | 0.565  |
| GBP2     | 0.0327 | 0.187 | up   | 0.757  |
| NCOR1    | 0.0338 | 0.192 | down | -0.242 |
| SERPINA3 | 0.0361 | 0.203 | up   | 0.875  |
| MAFF     | 0.0383 | 0.213 | up   | 0.588  |
| CSF1     | 0.0384 | 0.213 | up   | 0.592  |
| TPD52    | 0.0401 | 0.218 | down | -0.469 |
| PIK3R1   | 0.0398 | 0.218 | up   | 0.336  |
| TNFRSF1A | 0.0401 | 0.218 | up   | 0.459  |
| ATG7     | 0.0409 | 0.22  | up   | 0.189  |
| PDPN     | 0.0417 | 0.223 | up   | 0.79   |
| NRGN     | 0.042  | 0.223 | up   | 0.977  |
| RAC1     | 0.0439 | 0.229 | up   | 0.239  |
| RALA     | 0.0439 | 0.229 | up   | 0.303  |
| TNFRSF25 | 0.0442 | 0.229 | up   | 0.959  |
| MAPK10   | 0.0445 | 0.229 | up   | 1.11   |
| XCL1     | 0.046  | 0.233 | down | -1.18  |
| BAG3     | 0.046  | 0.233 | up   | 0.439  |
| MMP14    | 0.0468 | 0.235 | up   | 0.493  |
| CD300LF  | 0.05   | 0.25  | up   | 0.503  |
| RELA     | 0.0508 | 0.252 | up   | 0.255  |
| AGO4     | 0.0518 | 0.255 | up   | 0.423  |
| CD3D     | 0.0523 | 0.256 | up   | 0.857  |
| CSF2RB   | 0.0546 | 0.263 | down | -0.611 |
| AXL      | 0.0546 | 0.263 | up   | 0.851  |
| NRP2     | 0.0584 | 0.277 | up   | 0.46   |
| OSGIN1   | 0.0586 | 0.277 | up   | 0.467  |
| TRAF1    | 0.0581 | 0.277 | up   | 0.665  |
| SETDB1   | 0.0598 | 0.278 | down | -0.242 |
| SRGN     | 0.0605 | 0.278 | up   | 0.293  |
| DAB2     | 0.0603 | 0.278 | up   | 0.462  |
| C3       | 0.0596 | 0.278 | up   | 0.98   |
| HPRT1    | 0.0619 | 0.283 | up   | 0.332  |
| E2F1     | 0.0638 | 0.287 | down | -0.369 |
| NFKB2    | 0.064  | 0.287 | down | -0.344 |

|           |        |       |      |        |
|-----------|--------|-------|------|--------|
| SOX9      | 0.0638 | 0.287 | up   | 0.892  |
| ATG14     | 0.067  | 0.291 | up   | 0.259  |
| HDAC4     | 0.0658 | 0.291 | up   | 0.541  |
| PILRA     | 0.0671 | 0.291 | up   | 0.548  |
| TNFRSF12A | 0.0654 | 0.291 | up   | 0.71   |
| IL1R2     | 0.0663 | 0.291 | up   | 1.25   |
| GPR84     | 0.0688 | 0.295 | up   | 0.608  |
| GRM2      | 0.0687 | 0.295 | up   | 0.686  |
| IRAK3     | 0.0704 | 0.296 | down | -0.767 |
| APC       | 0.0697 | 0.296 | up   | 0.366  |
| SIGLEC8   | 0.0707 | 0.296 | up   | 0.835  |
| OLFML3    | 0.0705 | 0.296 | up   | 0.909  |
| ZBP1      | 0.0734 | 0.304 | down | -1.03  |
| BLNK      | 0.0735 | 0.304 | down | -0.342 |
| SLCO2B1   | 0.0759 | 0.312 | up   | 0.522  |
| COA5      | 0.077  | 0.315 | up   | 0.227  |
| S1PR3     | 0.08   | 0.323 | up   | 0.498  |
| SPHK1     | 0.0796 | 0.323 | up   | 0.621  |
| CH25H     | 0.082  | 0.329 | up   | 0.902  |
| CD14      | 0.0842 | 0.336 | up   | 0.523  |
| GRIN2A    | 0.085  | 0.337 | up   | 1.1    |
| CKS1B     | 0.0875 | 0.343 | down | -0.316 |
| PRDX1     | 0.0874 | 0.343 | up   | 0.28   |
| GDPD2     | 0.0886 | 0.346 | up   | 0.883  |
| CD68      | 0.0892 | 0.347 | up   | 0.348  |
| ITGA6     | 0.0897 | 0.347 | up   | 0.42   |
| OSMR      | 0.0932 | 0.358 | up   | 0.351  |
| LMNA      | 0.0939 | 0.359 | up   | 0.386  |
| TLR2      | 0.0956 | 0.362 | up   | 0.387  |
| OGG1      | 0.0958 | 0.362 | up   | 0.423  |
| HDAC2     | 0.0979 | 0.368 | down | -0.291 |
| MYD88     | 0.0984 | 0.368 | up   | 0.223  |
| RRM2      | 0.101  | 0.373 | down | -0.459 |
| CASP8     | 0.101  | 0.373 | down | -0.317 |
| TGFB1     | 0.101  | 0.373 | up   | 0.262  |
| TIMELESS  | 0.103  | 0.378 | down | -0.264 |
| NPL       | 0.105  | 0.382 | up   | 0.397  |
| DUSP7     | 0.108  | 0.392 | up   | 0.288  |
| CSF1R     | 0.11   | 0.396 | up   | 0.45   |
| IQSEC1    | 0.111  | 0.397 | up   | 0.45   |
| TNFSF13B  | 0.114  | 0.408 | up   | 0.472  |
| SESN2     | 0.115  | 0.409 | up   | 0.271  |
| CD24      | 0.121  | 0.418 | down | -1.19  |
| RIPK1     | 0.12   | 0.418 | down | -0.2   |
| NOD1      | 0.121  | 0.418 | up   | 0.231  |
| MS4A1     | 0.12   | 0.418 | up   | 0.38   |
| MERTK     | 0.121  | 0.418 | up   | 0.445  |
| HPGDS     | 0.12   | 0.418 | up   | 1      |
| MPG       | 0.123  | 0.421 | up   | 0.226  |
| TMEM119   | 0.123  | 0.421 | up   | 0.926  |
| PLCG2     | 0.125  | 0.425 | down | -0.195 |
| WAS       | 0.128  | 0.433 | down | -0.357 |
| GSTM1     | 0.133  | 0.444 | down | -2.82  |

|                 |       |       |      |        |
|-----------------|-------|-------|------|--------|
| <i>KLRB1</i>    | 0.138 | 0.444 | down | -0.877 |
| <i>BCL2L11</i>  | 0.137 | 0.444 | down | -0.652 |
| <i>IRF4</i>     | 0.137 | 0.444 | down | -0.458 |
| <i>PTPRC</i>    | 0.134 | 0.444 | down | -0.266 |
| <i>NFE2L2</i>   | 0.136 | 0.444 | up   | 0.151  |
| <i>BAG4</i>     | 0.138 | 0.444 | up   | 0.151  |
| <i>ATP6V1A</i>  | 0.135 | 0.444 | up   | 0.236  |
| <i>BTK</i>      | 0.135 | 0.444 | up   | 0.261  |
| <i>MVP</i>      | 0.139 | 0.444 | up   | 0.283  |
| <i>DAPK1</i>    | 0.136 | 0.444 | up   | 0.393  |
| <i>LDLRAD3</i>  | 0.139 | 0.444 | up   | 0.689  |
| <i>JARID2</i>   | 0.142 | 0.452 | up   | 0.421  |
| <i>PRKDC</i>    | 0.146 | 0.463 | up   | 0.2    |
| <i>KAT2B</i>    | 0.151 | 0.47  | up   | 0.232  |
| <i>JAG1</i>     | 0.151 | 0.47  | up   | 0.416  |
| <i>KIT</i>      | 0.15  | 0.47  | up   | 0.602  |
| <i>TMEM100</i>  | 0.153 | 0.475 | down | -1.07  |
| <i>ANXA1</i>    | 0.157 | 0.484 | down | -0.614 |
| <i>LYN</i>      | 0.157 | 0.484 | down | -0.253 |
| <i>IFI30</i>    | 0.158 | 0.485 | up   | 0.319  |
| <i>SERPING1</i> | 0.16  | 0.489 | up   | 0.407  |
| <i>CD19</i>     | 0.164 | 0.498 | up   | 0.484  |
| <i>ABCC8</i>    | 0.169 | 0.512 | up   | 0.46   |
| <i>TRAF6</i>    | 0.171 | 0.516 | up   | 0.122  |
| <i>MAP1LC3A</i> | 0.172 | 0.517 | up   | 0.494  |
| <i>BRD4</i>     | 0.173 | 0.518 | up   | 0.115  |
| <i>KDM5D</i>    | 0.18  | 0.524 | down | -2.25  |
| <i>CCL3</i>     | 0.186 | 0.524 | down | -0.544 |
| <i>NRM</i>      | 0.187 | 0.524 | down | -0.271 |
| <i>POLE</i>     | 0.18  | 0.524 | down | -0.241 |
| <i>MCM5</i>     | 0.188 | 0.524 | down | -0.233 |
| <i>NCAPH</i>    | 0.19  | 0.524 | down | -0.217 |
| <i>SMARCD1</i>  | 0.19  | 0.524 | down | -0.199 |
| <i>DNMT1</i>    | 0.178 | 0.524 | down | -0.191 |
| <i>PPP3CB</i>   | 0.19  | 0.524 | down | -0.126 |
| <i>BIRC2</i>    | 0.177 | 0.524 | up   | 0.155  |
| <i>KMT2A</i>    | 0.184 | 0.524 | up   | 0.185  |
| <i>IRF3</i>     | 0.18  | 0.524 | up   | 0.275  |
| <i>GRN</i>      | 0.178 | 0.524 | up   | 0.299  |
| <i>KCND1</i>    | 0.189 | 0.524 | up   | 0.332  |
| <i>SRXN1</i>    | 0.183 | 0.524 | up   | 0.337  |
| <i>CLIC4</i>    | 0.182 | 0.524 | up   | 0.344  |
| <i>BLK</i>      | 0.189 | 0.524 | up   | 0.549  |
| <i>FCGR1A</i>   | 0.189 | 0.524 | up   | 0.628  |
| <i>TP73</i>     | 0.185 | 0.524 | up   | 1.04   |
| <i>GZMB</i>     | 0.182 | 0.524 | up   | 1.13   |
| <i>ITGAM</i>    | 0.192 | 0.525 | up   | 0.355  |
| <i>TCL1A</i>    | 0.192 | 0.525 | up   | 0.608  |
| <i>CSF3R</i>    | 0.193 | 0.526 | up   | 0.341  |
| <i>OAS1</i>     | 0.195 | 0.528 | down | -0.411 |
| <i>FGD2</i>     | 0.197 | 0.531 | down | -0.346 |
| <i>KDM4B</i>    | 0.202 | 0.539 | up   | 0.189  |
| <i>CALCOCO2</i> | 0.202 | 0.539 | up   | 0.25   |

|                  |       |       |      |        |
|------------------|-------|-------|------|--------|
| <i>KDM5C</i>     | 0.201 | 0.539 | up   | 0.256  |
| <i>SETD7</i>     | 0.205 | 0.545 | down | -0.197 |
| <i>KDM3B</i>     | 0.207 | 0.546 | down | -0.13  |
| <i>CCL5</i>      | 0.207 | 0.546 | up   | 0.448  |
| <i>FLT1</i>      | 0.209 | 0.548 | up   | 0.287  |
| <i>SERPINF1</i>  | 0.209 | 0.548 | up   | 0.412  |
| <i>JUN</i>       | 0.212 | 0.554 | up   | 0.309  |
| <i>RGL1</i>      | 0.215 | 0.558 | up   | 0.337  |
| <i>CHEK2</i>     | 0.219 | 0.561 | down | -0.344 |
| <i>BIRC5</i>     | 0.222 | 0.561 | down | -0.254 |
| <i>PPP3R1</i>    | 0.221 | 0.561 | up   | 0.126  |
| <i>VIM</i>       | 0.222 | 0.561 | up   | 0.183  |
| <i>PPP3CA</i>    | 0.22  | 0.561 | up   | 0.236  |
| <i>IL1RAP</i>    | 0.221 | 0.561 | up   | 0.36   |
| <i>FPR1</i>      | 0.222 | 0.561 | up   | 0.396  |
| <i>NPNT</i>      | 0.217 | 0.561 | up   | 0.559  |
| <i>TYROBP</i>    | 0.226 | 0.567 | up   | 0.311  |
| <i>MSR1</i>      | 0.226 | 0.567 | up   | 0.609  |
| <i>PRKCQ</i>     | 0.228 | 0.569 | up   | 0.582  |
| <i>CLDN5</i>     | 0.232 | 0.577 | up   | 0.587  |
| <i>KLRD1</i>     | 0.234 | 0.578 | down | -0.63  |
| <i>EHMT2</i>     | 0.236 | 0.578 | up   | 0.181  |
| <i>SLAMF8</i>    | 0.235 | 0.578 | up   | 0.276  |
| <i>CD83</i>      | 0.234 | 0.578 | up   | 0.515  |
| <i>LSR</i>       | 0.237 | 0.579 | down | -0.623 |
| <i>ESAM</i>      | 0.238 | 0.579 | up   | 0.222  |
| <i>CX3CR1</i>    | 0.239 | 0.581 | up   | 0.587  |
| <i>ZNF367</i>    | 0.243 | 0.585 | down | -0.245 |
| <i>LTBR</i>      | 0.242 | 0.585 | up   | 0.305  |
| <i>SPP1</i>      | 0.246 | 0.59  | up   | 0.543  |
| <i>SESN1</i>     | 0.247 | 0.591 | up   | 0.4    |
| <i>HILPDA</i>    | 0.248 | 0.591 | up   | 0.601  |
| <i>SOX4</i>      | 0.25  | 0.595 | down | -0.552 |
| <i>CD6</i>       | 0.251 | 0.596 | up   | 0.585  |
| <i>CD3G</i>      | 0.253 | 0.598 | up   | 0.604  |
| <i>FABP5</i>     | 0.256 | 0.599 | up   | 0.219  |
| <i>TGM2</i>      | 0.255 | 0.599 | up   | 0.265  |
| <i>NCF1</i>      | 0.256 | 0.599 | up   | 0.277  |
| <i>IGSF6</i>     | 0.257 | 0.599 | up   | 0.465  |
| <i>MR1</i>       | 0.259 | 0.6   | up   | 0.23   |
| <i>KMT2C</i>     | 0.26  | 0.603 | up   | 0.134  |
| <i>PARP1</i>     | 0.262 | 0.604 | up   | 0.204  |
| <i>IGSF10</i>    | 0.263 | 0.604 | up   | 1.67   |
| <i>EED</i>       | 0.267 | 0.61  | up   | 0.121  |
| <i>TNFRSF11B</i> | 0.267 | 0.61  | up   | 0.442  |
| <i>NFKB1</i>     | 0.269 | 0.613 | down | -0.164 |
| <i>VPS4A</i>     | 0.273 | 0.62  | up   | 0.133  |
| <i>ANAPC15</i>   | 0.275 | 0.62  | up   | 0.193  |
| <i>CD86</i>      | 0.274 | 0.62  | up   | 0.336  |
| <i>BOLA2</i>     | 0.283 | 0.624 | down | -0.22  |
| <i>MB21D1</i>    | 0.283 | 0.624 | down | -0.2   |
| <i>HIRA</i>      | 0.278 | 0.624 | down | -0.105 |
| <i>PMS2</i>      | 0.281 | 0.624 | up   | 0.155  |

|                |       |       |      |        |
|----------------|-------|-------|------|--------|
| <i>FCER1G</i>  | 0.28  | 0.624 | up   | 0.3    |
| <i>CASS4</i>   | 0.286 | 0.624 | up   | 0.313  |
| <i>TM4SF1</i>  | 0.285 | 0.624 | up   | 0.428  |
| <i>PTX3</i>    | 0.284 | 0.624 | up   | 0.437  |
| <i>TRAT1</i>   | 0.282 | 0.624 | up   | 0.569  |
| <i>RELN</i>    | 0.284 | 0.624 | up   | 0.749  |
| <i>PNOC</i>    | 0.29  | 0.626 | down | -0.465 |
| <i>TMEM64</i>  | 0.29  | 0.626 | down | -0.213 |
| <i>BRD3</i>    | 0.289 | 0.626 | up   | 0.201  |
| <i>KDM6A</i>   | 0.292 | 0.626 | up   | 0.252  |
| <i>SLFN11</i>  | 0.289 | 0.626 | up   | 0.344  |
| <i>ITGB5</i>   | 0.291 | 0.626 | up   | 0.369  |
| <i>ERCC2</i>   | 0.294 | 0.627 | up   | 0.112  |
| <i>NLRP3</i>   | 0.295 | 0.629 | up   | 0.398  |
| <i>RAB7A</i>   | 0.297 | 0.63  | up   | 0.159  |
| <i>STAT1</i>   | 0.297 | 0.63  | up   | 0.285  |
| <i>CASP1</i>   | 0.299 | 0.631 | up   | 0.289  |
| <i>IFNAR2</i>  | 0.304 | 0.638 | up   | 0.188  |
| <i>CD3E</i>    | 0.304 | 0.638 | up   | 0.475  |
| <i>DNA2</i>    | 0.305 | 0.639 | down | -0.156 |
| <i>PIK3R2</i>  | 0.308 | 0.642 | up   | 0.191  |
| <i>CD33</i>    | 0.312 | 0.65  | up   | 0.443  |
| <i>EGFR</i>    | 0.314 | 0.651 | up   | 0.208  |
| <i>CXCL10</i>  | 0.323 | 0.653 | down | -0.432 |
| <i>PTTG1</i>   | 0.32  | 0.653 | down | -0.248 |
| <i>PTEN</i>    | 0.317 | 0.653 | down | -0.133 |
| <i>RAD17</i>   | 0.321 | 0.653 | down | -0.11  |
| <i>AMBRA1</i>  | 0.322 | 0.653 | up   | 0.0803 |
| <i>MSH2</i>    | 0.322 | 0.653 | up   | 0.15   |
| <i>KDM3A</i>   | 0.316 | 0.653 | up   | 0.184  |
| <i>KAT2A</i>   | 0.32  | 0.653 | up   | 0.196  |
| <i>FDXR</i>    | 0.322 | 0.653 | up   | 0.308  |
| <i>CDC25A</i>  | 0.327 | 0.657 | up   | 0.206  |
| <i>IGF1R</i>   | 0.327 | 0.657 | up   | 0.337  |
| <i>CD47</i>    | 0.329 | 0.658 | up   | 0.144  |
| <i>ATR</i>     | 0.33  | 0.659 | up   | 0.113  |
| <i>KCNK13</i>  | 0.331 | 0.66  | up   | 0.505  |
| <i>FGL2</i>    | 0.333 | 0.662 | up   | 0.384  |
| <i>C1QC</i>    | 0.334 | 0.662 | up   | 0.482  |
| <i>NOSTRIN</i> | 0.339 | 0.67  | up   | 0.23   |
| <i>HAT1</i>    | 0.347 | 0.682 | down | -0.109 |
| <i>MSN</i>     | 0.347 | 0.682 | up   | 0.171  |
| <i>SLC2A5</i>  | 0.35  | 0.685 | up   | 0.401  |
| <i>BAD</i>     | 0.353 | 0.686 | up   | 0.136  |
| <i>C1QB</i>    | 0.352 | 0.686 | up   | 0.478  |
| <i>ARID1A</i>  | 0.355 | 0.687 | up   | 0.125  |
| <i>CHN2</i>    | 0.356 | 0.687 | up   | 0.472  |
| <i>CD8B</i>    | 0.355 | 0.687 | up   | 0.582  |
| <i>C3AR1</i>   | 0.357 | 0.688 | up   | 0.307  |
| <i>LRG1</i>    | 0.364 | 0.693 | down | -0.452 |
| <i>LMNB1</i>   | 0.365 | 0.693 | down | -0.158 |
| <i>TARBP2</i>  | 0.365 | 0.693 | up   | 0.167  |
| <i>B3GNT5</i>  | 0.362 | 0.693 | up   | 0.332  |

|          |       |       |      |         |
|----------|-------|-------|------|---------|
| LGMN     | 0.364 | 0.693 | up   | 0.343   |
| KDM2B    | 0.367 | 0.695 | up   | 0.252   |
| HIST1H1D | 0.37  | 0.696 | down | -0.271  |
| MYC      | 0.369 | 0.696 | up   | 0.193   |
| CD40     | 0.375 | 0.703 | down | -0.209  |
| VPS4B    | 0.375 | 0.703 | down | -0.151  |
| FCRLA    | 0.376 | 0.704 | up   | 0.375   |
| CTSS     | 0.379 | 0.705 | up   | 0.138   |
| HPS4     | 0.379 | 0.705 | up   | 0.158   |
| MDM2     | 0.383 | 0.706 | down | -0.222  |
| PCNA     | 0.382 | 0.706 | down | -0.172  |
| EZH2     | 0.382 | 0.706 | down | -0.166  |
| CIDEB    | 0.386 | 0.71  | down | -0.183  |
| TMEM204  | 0.393 | 0.72  | up   | 0.217   |
| IGF2R    | 0.394 | 0.721 | down | -0.182  |
| FKBP5    | 0.397 | 0.725 | up   | 0.145   |
| CFLAR    | 0.405 | 0.731 | down | -0.208  |
| SMARCA4  | 0.408 | 0.731 | down | -0.0876 |
| MAVS     | 0.406 | 0.731 | up   | 0.106   |
| TMEM173  | 0.407 | 0.731 | up   | 0.184   |
| LILRB4   | 0.408 | 0.731 | up   | 0.204   |
| LRRC3    | 0.409 | 0.731 | up   | 0.27    |
| COL6A3   | 0.401 | 0.731 | up   | 0.353   |
| CD72     | 0.404 | 0.731 | up   | 0.392   |
| RIPK2    | 0.413 | 0.736 | up   | 0.0899  |
| BCL10    | 0.415 | 0.737 | down | -0.135  |
| IFNAR1   | 0.418 | 0.737 | up   | 0.0931  |
| SUMO1    | 0.414 | 0.737 | up   | 0.115   |
| ATP6V0E1 | 0.416 | 0.737 | up   | 0.126   |
| TOP2A    | 0.421 | 0.738 | down | -0.169  |
| CSK      | 0.423 | 0.738 | down | -0.133  |
| IFIH1    | 0.421 | 0.738 | up   | 0.175   |
| MFGE8    | 0.422 | 0.738 | up   | 0.28    |
| GPR34    | 0.423 | 0.738 | up   | 0.472   |
| RELB     | 0.425 | 0.739 | down | -0.142  |
| CHUK     | 0.429 | 0.745 | up   | 0.092   |
| LAIR1    | 0.431 | 0.745 | up   | 0.2     |
| PLEKHM1  | 0.432 | 0.746 | up   | 0.0955  |
| EGR1     | 0.436 | 0.75  | down | -0.279  |
| MMP12    | 0.445 | 0.756 | down | -0.504  |
| PIK3R5   | 0.442 | 0.756 | down | -0.305  |
| SIN3A    | 0.449 | 0.756 | up   | 0.0845  |
| MAN2B1   | 0.448 | 0.756 | up   | 0.109   |
| ICAM2    | 0.449 | 0.756 | up   | 0.147   |
| MAFB     | 0.445 | 0.756 | up   | 0.24    |
| CLEC7A   | 0.445 | 0.756 | up   | 0.267   |
| FCGR3A   | 0.448 | 0.756 | up   | 0.376   |
| SIGLEC1  | 0.446 | 0.756 | up   | 0.429   |
| DDB2     | 0.451 | 0.757 | up   | 0.168   |
| CRIP1    | 0.451 | 0.757 | up   | 0.219   |
| MBD2     | 0.455 | 0.758 | down | -0.176  |
| BRCA1    | 0.454 | 0.758 | down | -0.141  |
| H2AFX    | 0.456 | 0.759 | down | -0.167  |



|                 |       |       |      |         |
|-----------------|-------|-------|------|---------|
| <i>HMOX1</i>    | 0.459 | 0.762 | down | -0.292  |
| <i>KLRK1</i>    | 0.46  | 0.762 | up   | 0.322   |
| <i>IL15RA</i>   | 0.462 | 0.763 | down | -0.155  |
| <i>CEACAM3</i>  | 0.464 | 0.766 | down | -0.212  |
| <i>EZH1</i>     | 0.468 | 0.77  | up   | 0.156   |
| <i>TBC1D4</i>   | 0.48  | 0.776 | down | -0.398  |
| <i>EXO1</i>     | 0.476 | 0.776 | down | -0.195  |
| <i>BRD2</i>     | 0.479 | 0.776 | down | -0.157  |
| <i>STX18</i>    | 0.479 | 0.776 | down | -0.0775 |
| <i>CALR</i>     | 0.476 | 0.776 | up   | 0.102   |
| <i>FANCD2</i>   | 0.484 | 0.776 | up   | 0.108   |
| <i>PROS1</i>    | 0.483 | 0.776 | up   | 0.205   |
| <i>CREM</i>     | 0.482 | 0.776 | up   | 0.215   |
| <i>TNFRSF1B</i> | 0.479 | 0.776 | up   | 0.231   |
| <i>NINJ2</i>    | 0.479 | 0.776 | up   | 0.294   |
| <i>BCL2</i>     | 0.479 | 0.776 | up   | 0.311   |
| <i>PEX14</i>    | 0.488 | 0.777 | up   | 0.0815  |
| <i>CLCF1</i>    | 0.487 | 0.777 | up   | 0.294   |
| <i>TRPM4</i>    | 0.486 | 0.777 | up   | 0.374   |
| <i>RPA1</i>     | 0.497 | 0.779 | down | -0.128  |
| <i>MAP2K4</i>   | 0.495 | 0.779 | up   | 0.0893  |
| <i>WDR5</i>     | 0.497 | 0.779 | up   | 0.097   |
| <i>PIK3CD</i>   | 0.497 | 0.779 | up   | 0.109   |
| <i>CDC7</i>     | 0.496 | 0.779 | up   | 0.13    |
| <i>HDAC6</i>    | 0.498 | 0.779 | up   | 0.165   |
| <i>FCAR</i>     | 0.495 | 0.779 | up   | 0.208   |
| <i>C1QA</i>     | 0.498 | 0.779 | up   | 0.327   |
| <i>RPL36AL</i>  | 0.501 | 0.782 | down | -0.101  |
| <i>GNLY</i>     | 0.506 | 0.786 | down | -0.415  |
| <i>RPL9</i>     | 0.507 | 0.786 | down | -0.111  |
| <i>BECN1</i>    | 0.506 | 0.786 | up   | 0.0677  |
| <i>RPL29</i>    | 0.509 | 0.788 | up   | 0.0972  |
| <i>EEF2K</i>    | 0.515 | 0.793 | down | -0.129  |
| <i>FYN</i>      | 0.514 | 0.793 | up   | 0.199   |
| <i>PLD2</i>     | 0.518 | 0.797 | down | -0.134  |
| <i>CYTIP</i>    | 0.522 | 0.8   | down | -0.218  |
| <i>ASB2</i>     | 0.527 | 0.806 | up   | 0.207   |
| <i>S1PR4</i>    | 0.531 | 0.81  | down | -0.3    |
| <i>NCOR2</i>    | 0.534 | 0.813 | up   | 0.127   |
| <i>BID</i>      | 0.539 | 0.816 | down | -0.148  |
| <i>VAV1</i>     | 0.543 | 0.816 | down | -0.094  |
| <i>EIF1</i>     | 0.54  | 0.816 | down | -0.0938 |
| <i>MAPK14</i>   | 0.541 | 0.816 | up   | 0.0814  |
| <i>TET1</i>     | 0.542 | 0.816 | up   | 0.204   |
| <i>TIMP1</i>    | 0.539 | 0.816 | up   | 0.253   |
| <i>CABLES1</i>  | 0.545 | 0.817 | down | -0.36   |
| <i>RAD1</i>     | 0.546 | 0.817 | up   | 0.085   |
| <i>BLM</i>      | 0.549 | 0.819 | down | -0.129  |
| <i>PAK1</i>     | 0.557 | 0.826 | up   | 0.14    |
| <i>FAS</i>      | 0.555 | 0.826 | up   | 0.166   |
| <i>PSEN2</i>    | 0.556 | 0.826 | up   | 0.167   |
| <i>IL2RG</i>    | 0.56  | 0.827 | up   | 0.125   |
| <i>CCR5</i>     | 0.559 | 0.827 | up   | 0.238   |

|                |       |       |      |         |
|----------------|-------|-------|------|---------|
| <i>FA2H</i>    | 0.561 | 0.827 | up   | 0.3     |
| <i>RB1CC1</i>  | 0.566 | 0.833 | down | -0.0532 |
| <i>MAP3K1</i>  | 0.569 | 0.834 | down | -0.0699 |
| <i>SETD1A</i>  | 0.569 | 0.834 | down | -0.0543 |
| <i>RPL28</i>   | 0.573 | 0.836 | down | -0.102  |
| <i>ASPH</i>    | 0.573 | 0.836 | up   | 0.104   |
| <i>KDM4C</i>   | 0.577 | 0.84  | up   | 0.0923  |
| <i>DNMT3A</i>  | 0.582 | 0.844 | up   | 0.173   |
| <i>ABCC3</i>   | 0.581 | 0.844 | up   | 0.226   |
| <i>GPR183</i>  | 0.589 | 0.845 | down | -0.306  |
| <i>GADD45A</i> | 0.587 | 0.845 | down | -0.217  |
| <i>AKT2</i>    | 0.592 | 0.845 | up   | 0.0448  |
| <i>EPG5</i>    | 0.593 | 0.845 | up   | 0.0799  |
| <i>BMI1</i>    | 0.594 | 0.845 | up   | 0.1     |
| <i>DOT1L</i>   | 0.586 | 0.845 | up   | 0.114   |
| <i>MCM2</i>    | 0.592 | 0.845 | up   | 0.139   |
| <i>CCL2</i>    | 0.589 | 0.845 | up   | 0.151   |
| <i>MPEG1</i>   | 0.591 | 0.845 | up   | 0.225   |
| <i>NCR1</i>    | 0.593 | 0.845 | up   | 0.368   |
| <i>RAD51</i>   | 0.602 | 0.847 | down | -0.109  |
| <i>MCM6</i>    | 0.603 | 0.847 | down | -0.101  |
| <i>SMARCA5</i> | 0.605 | 0.847 | down | -0.0551 |
| <i>PRKAR1A</i> | 0.599 | 0.847 | up   | 0.0826  |
| <i>IFITM2</i>  | 0.605 | 0.847 | up   | 0.138   |
| <i>GCLC</i>    | 0.604 | 0.847 | up   | 0.15    |
| <i>MS4A4A</i>  | 0.607 | 0.847 | up   | 0.203   |
| <i>C5AR1</i>   | 0.608 | 0.847 | up   | 0.243   |
| <i>GRAP</i>    | 0.598 | 0.847 | up   | 0.267   |
| <i>CD70</i>    | 0.607 | 0.847 | up   | 0.273   |
| <i>IRF7</i>    | 0.613 | 0.852 | down | -0.181  |
| <i>NFKBIE</i>  | 0.615 | 0.853 | down | -0.102  |
| <i>CD8A</i>    | 0.618 | 0.856 | up   | 0.291   |
| <i>FCGR2B</i>  | 0.621 | 0.859 | up   | 0.239   |
| <i>LDHA</i>    | 0.631 | 0.87  | up   | 0.0832  |
| <i>TREM1</i>   | 0.64  | 0.879 | down | -0.231  |
| <i>TRAF3</i>   | 0.642 | 0.879 | down | -0.0871 |
| <i>BARD1</i>   | 0.644 | 0.879 | down | -0.0618 |
| <i>BAK1</i>    | 0.641 | 0.879 | up   | 0.0731  |
| <i>SETD1B</i>  | 0.641 | 0.879 | up   | 0.0949  |
| <i>MARCO</i>   | 0.672 | 0.88  | down | -0.299  |
| <i>LAG3</i>    | 0.677 | 0.88  | down | -0.218  |
| <i>BBC3</i>    | 0.677 | 0.88  | down | -0.173  |
| <i>ATF3</i>    | 0.656 | 0.88  | down | -0.159  |
| <i>TRAF2</i>   | 0.659 | 0.88  | down | -0.134  |
| <i>MAP3K14</i> | 0.672 | 0.88  | down | -0.0809 |
| <i>IRAK4</i>   | 0.656 | 0.88  | down | -0.06   |
| <i>SIRT1</i>   | 0.667 | 0.88  | down | -0.0529 |
| <i>NBN</i>     | 0.656 | 0.88  | down | -0.0497 |
| <i>CREBBP</i>  | 0.665 | 0.88  | down | -0.0437 |
| <i>ULK1</i>    | 0.665 | 0.88  | up   | 0.0632  |
| <i>FEN1</i>    | 0.659 | 0.88  | up   | 0.0634  |
| <i>CASP2</i>   | 0.667 | 0.88  | up   | 0.0646  |
| <i>INPP5D</i>  | 0.66  | 0.88  | up   | 0.0823  |

|                |       |       |      |         |
|----------------|-------|-------|------|---------|
| <i>TLE3</i>    | 0.671 | 0.88  | up   | 0.09    |
| <i>LRRC25</i>  | 0.672 | 0.88  | up   | 0.0906  |
| <i>TP53BP2</i> | 0.651 | 0.88  | up   | 0.105   |
| <i>TNFSF4</i>  | 0.657 | 0.88  | up   | 0.119   |
| <i>TP53</i>    | 0.669 | 0.88  | up   | 0.12    |
| <i>EPSTI1</i>  | 0.674 | 0.88  | up   | 0.133   |
| <i>IL1RN</i>   | 0.67  | 0.88  | up   | 0.137   |
| <i>FOS</i>     | 0.676 | 0.88  | up   | 0.16    |
| <i>TLR7</i>    | 0.648 | 0.88  | up   | 0.209   |
| <i>CST7</i>    | 0.668 | 0.88  | up   | 0.225   |
| <i>LY9</i>     | 0.647 | 0.88  | up   | 0.229   |
| <i>FASLG</i>   | 0.658 | 0.88  | up   | 0.24    |
| <i>P2RY12</i>  | 0.679 | 0.881 | up   | 0.196   |
| <i>CYCS</i>    | 0.691 | 0.891 | down | -0.0916 |
| <i>CCNI</i>    | 0.689 | 0.891 | down | -0.0467 |
| <i>SMC1A</i>   | 0.689 | 0.891 | up   | 0.0932  |
| <i>CTSW</i>    | 0.694 | 0.893 | up   | 0.206   |
| <i>RAD51B</i>  | 0.698 | 0.895 | down | -0.0674 |
| <i>RAD51C</i>  | 0.697 | 0.895 | down | -0.0424 |
| <i>BIK</i>     | 0.707 | 0.897 | down | -0.191  |
| <i>PTMS</i>    | 0.709 | 0.897 | down | -0.106  |
| <i>NQO1</i>    | 0.702 | 0.897 | down | -0.0875 |
| <i>CASP7</i>   | 0.708 | 0.897 | down | -0.074  |
| <i>IRAK1</i>   | 0.71  | 0.897 | up   | 0.0675  |
| <i>TCIRG1</i>  | 0.704 | 0.897 | up   | 0.0772  |
| <i>RNF8</i>    | 0.7   | 0.897 | up   | 0.086   |
| <i>KDM5B</i>   | 0.707 | 0.897 | up   | 0.138   |
| <i>KDM2A</i>   | 0.716 | 0.9   | down | -0.0495 |
| <i>TFG</i>     | 0.717 | 0.9   | up   | 0.048   |
| <i>SQSTM1</i>  | 0.717 | 0.9   | up   | 0.0741  |
| <i>CDKN1A</i>  | 0.718 | 0.9   | up   | 0.0921  |
| <i>MAPK12</i>  | 0.718 | 0.9   | up   | 0.122   |
| <i>LIG1</i>    | 0.724 | 0.901 | down | -0.0651 |
| <i>SUZ12</i>   | 0.722 | 0.901 | down | -0.042  |
| <i>IRF8</i>    | 0.721 | 0.901 | up   | 0.135   |
| <i>CASP3</i>   | 0.725 | 0.902 | down | -0.0778 |
| <i>HRK</i>     | 0.734 | 0.907 | down | -0.194  |
| <i>FANCC</i>   | 0.734 | 0.907 | down | -0.0967 |
| <i>PIK3CA</i>  | 0.731 | 0.907 | down | -0.0593 |
| <i>IKBKB</i>   | 0.736 | 0.907 | down | -0.0538 |
| <i>CCNG2</i>   | 0.736 | 0.907 | up   | 0.0683  |
| <i>HOMER1</i>  | 0.744 | 0.912 | down | -0.12   |
| <i>HIF1A</i>   | 0.743 | 0.912 | up   | 0.0605  |
| <i>CASP9</i>   | 0.744 | 0.912 | up   | 0.0647  |
| <i>VEGFA</i>   | 0.746 | 0.913 | up   | 0.122   |
| <i>CXCL9</i>   | 0.747 | 0.913 | up   | 0.166   |
| <i>CP</i>      | 0.753 | 0.914 | down | -0.151  |
| <i>TMEM37</i>  | 0.753 | 0.914 | down | -0.146  |
| <i>DNMT3B</i>  | 0.751 | 0.914 | down | -0.115  |
| <i>HLA-E</i>   | 0.752 | 0.914 | down | -0.04   |
| <i>IL1B</i>    | 0.762 | 0.922 | down | -0.13   |
| <i>CD163</i>   | 0.762 | 0.922 | up   | 0.123   |
| <i>TNFSF10</i> | 0.767 | 0.923 | down | -0.0689 |

|                  |       |       |      |         |
|------------------|-------|-------|------|---------|
| <i>MBD3</i>      | 0.766 | 0.923 | down | -0.0531 |
| <i>PILRB</i>     | 0.765 | 0.923 | up   | 0.0444  |
| <i>APEX1</i>     | 0.778 | 0.928 | down | -0.0455 |
| <i>CHEK1</i>     | 0.777 | 0.928 | down | -0.0446 |
| <i>EP300</i>     | 0.782 | 0.928 | down | -0.0223 |
| <i>ETS2</i>      | 0.777 | 0.928 | up   | 0.05    |
| <i>SPIB</i>      | 0.782 | 0.928 | up   | 0.0894  |
| <i>TBX21</i>     | 0.775 | 0.928 | up   | 0.14    |
| <i>TNF</i>       | 0.777 | 0.928 | up   | 0.148   |
| <i>LTA</i>       | 0.782 | 0.928 | up   | 0.172   |
| <i>PRF1</i>      | 0.785 | 0.93  | up   | 0.105   |
| <i>PECAM1</i>    | 0.788 | 0.932 | up   | 0.0509  |
| <i>S100A12</i>   | 0.797 | 0.933 | down | -0.13   |
| <i>IL3RA</i>     | 0.8   | 0.933 | down | -0.1    |
| <i>SPINT1</i>    | 0.797 | 0.933 | down | -0.095  |
| <i>HELLS</i>     | 0.798 | 0.933 | down | -0.0425 |
| <i>MEF2C</i>     | 0.798 | 0.933 | up   | 0.0479  |
| <i>BIRC3</i>     | 0.799 | 0.933 | up   | 0.0656  |
| <i>TLR4</i>      | 0.794 | 0.933 | up   | 0.0678  |
| <i>PTGS2</i>     | 0.793 | 0.933 | up   | 0.124   |
| <i>TNFRSF17</i>  | 0.806 | 0.934 | down | -0.119  |
| <i>IKBKE</i>     | 0.805 | 0.934 | up   | 0.0462  |
| <i>VAMP7</i>     | 0.802 | 0.934 | up   | 0.0483  |
| <i>SERPINE1</i>  | 0.805 | 0.934 | up   | 0.108   |
| <i>FADD</i>      | 0.809 | 0.936 | down | -0.0507 |
| <i>IGF1</i>      | 0.814 | 0.937 | down | -0.109  |
| <i>CASP6</i>     | 0.812 | 0.937 | down | -0.0418 |
| <i>CLN3</i>      | 0.814 | 0.937 | up   | 0.0381  |
| <i>PRKACA</i>    | 0.817 | 0.94  | up   | 0.027   |
| <i>TNFRSF13C</i> | 0.825 | 0.941 | down | -0.0877 |
| <i>BCL2A1</i>    | 0.825 | 0.941 | down | -0.081  |
| <i>NTHL1</i>     | 0.825 | 0.941 | down | -0.0567 |
| <i>KDM1A</i>     | 0.823 | 0.941 | up   | 0.0312  |
| <i>IL6R</i>      | 0.82  | 0.941 | up   | 0.0987  |
| <i>NKG7</i>      | 0.827 | 0.942 | down | -0.0843 |
| <i>TMEM206</i>   | 0.829 | 0.942 | up   | 0.0394  |
| <i>TNFRSF10B</i> | 0.831 | 0.943 | up   | 0.0377  |
| <i>KIF2C</i>     | 0.833 | 0.944 | up   | 0.0399  |
| <i>IRAK2</i>     | 0.837 | 0.945 | down | -0.0828 |
| <i>PRKCE</i>     | 0.842 | 0.945 | down | -0.0799 |
| <i>DOCK2</i>     | 0.839 | 0.945 | down | -0.0179 |
| <i>BRAF</i>      | 0.846 | 0.945 | up   | 0.0237  |
| <i>KDM1B</i>     | 0.843 | 0.945 | up   | 0.0306  |
| <i>HDAC1</i>     | 0.841 | 0.945 | up   | 0.0317  |
| <i>ITGAX</i>     | 0.847 | 0.945 | up   | 0.0766  |
| <i>PLA2G5</i>    | 0.839 | 0.945 | up   | 0.0824  |
| <i>TNFSF8</i>    | 0.846 | 0.945 | up   | 0.0975  |
| <i>GZMA</i>      | 0.852 | 0.95  | up   | 0.122   |
| <i>MAP2K1</i>    | 0.856 | 0.953 | down | -0.0224 |
| <i>RPS21</i>     | 0.861 | 0.955 | down | -0.0236 |
| <i>ATM</i>       | 0.861 | 0.955 | up   | 0.0275  |
| <i>CD44</i>      | 0.863 | 0.956 | up   | 0.0664  |
| <i>BCL2L1</i>    | 0.865 | 0.957 | up   | 0.0366  |

|          |       |       |      |          |
|----------|-------|-------|------|----------|
| AMIGO2   | 0.87  | 0.959 | down | -0.066   |
| ARHGAP24 | 0.87  | 0.959 | up   | 0.0519   |
| RAD9A    | 0.875 | 0.961 | down | -0.0308  |
| XIAP     | 0.876 | 0.961 | down | -0.0207  |
| SH2D1A   | 0.874 | 0.961 | up   | 0.0936   |
| HMGB1    | 0.883 | 0.962 | down | -0.0382  |
| TOPBP1   | 0.884 | 0.962 | down | -0.0171  |
| SUV39H2  | 0.884 | 0.962 | up   | 0.0249   |
| PIK3CG   | 0.88  | 0.962 | up   | 0.0537   |
| PLA2G4A  | 0.88  | 0.962 | up   | 0.0679   |
| IKBKG    | 0.888 | 0.966 | down | -0.028   |
| FANCG    | 0.89  | 0.967 | down | -0.0249  |
| RPS2     | 0.897 | 0.971 | down | -0.0151  |
| ASH2L    | 0.898 | 0.971 | down | -0.0103  |
| HSD11B1  | 0.905 | 0.978 | down | -0.0399  |
| CD36     | 0.917 | 0.985 | down | -0.0677  |
| CCL4     | 0.918 | 0.985 | down | -0.0468  |
| RALB     | 0.926 | 0.985 | down | -0.0231  |
| TGM1     | 0.919 | 0.985 | down | -0.0223  |
| BAX      | 0.922 | 0.985 | down | -0.0185  |
| NFKBIA   | 0.925 | 0.985 | down | -0.0142  |
| HUS1     | 0.926 | 0.985 | up   | 0.00909  |
| RPS9     | 0.924 | 0.985 | up   | 0.0117   |
| COTL1    | 0.921 | 0.985 | up   | 0.0225   |
| LTC4S    | 0.914 | 0.985 | up   | 0.0359   |
| CNN2     | 0.93  | 0.987 | down | -0.0274  |
| SLC44A1  | 0.931 | 0.987 | up   | 0.0263   |
| PSMB8    | 0.934 | 0.989 | up   | 0.0314   |
| AKT1     | 0.942 | 0.992 | down | -0.0155  |
| STMN1    | 0.939 | 0.992 | down | -0.0145  |
| GBA      | 0.943 | 0.992 | down | -0.0104  |
| ATG9A    | 0.938 | 0.992 | down | -0.00972 |
| EPCAM    | 0.941 | 0.992 | up   | 0.0502   |
| RPS10    | 0.949 | 0.994 | up   | 0.012    |
| PTPN6    | 0.948 | 0.994 | up   | 0.0189   |
| EMCN     | 0.957 | 0.995 | down | -0.0161  |
| SELL     | 0.979 | 0.995 | down | -0.0135  |
| SUV39H1  | 0.981 | 0.995 | down | -0.00562 |
| TRADD    | 0.979 | 0.995 | down | -0.00534 |
| RPS3     | 0.97  | 0.995 | down | -0.00529 |
| PARP2    | 0.97  | 0.995 | down | -0.00526 |
| XRCC6    | 0.96  | 0.995 | down | -0.00499 |
| IRF1     | 0.982 | 0.995 | down | -0.0049  |
| PRKAR2A  | 0.981 | 0.995 | down | -0.00401 |
| CREB1    | 0.981 | 0.995 | up   | 0.00244  |
| ATG3     | 0.981 | 0.995 | up   | 0.00275  |
| COX5B    | 0.974 | 0.995 | up   | 0.00295  |
| TXNRD1   | 0.975 | 0.995 | up   | 0.00591  |
| KDM5A    | 0.963 | 0.995 | up   | 0.00609  |
| IL21R    | 0.98  | 0.995 | up   | 0.00727  |
| RAD50    | 0.954 | 0.995 | up   | 0.0073   |
| PYCARD   | 0.962 | 0.995 | up   | 0.00935  |
| FBLN5    | 0.972 | 0.995 | up   | 0.0131   |

|                |       |       |      |          |
|----------------|-------|-------|------|----------|
| <i>CAMK4</i>   | 0.974 | 0.995 | up   | 0.0163   |
| <i>SYK</i>     | 0.952 | 0.995 | up   | 0.0177   |
| <i>STEAP4</i>  | 0.959 | 0.995 | up   | 0.0186   |
| <i>CD209</i>   | 0.973 | 0.995 | up   | 0.0225   |
| <i>BNIP3</i>   | 0.953 | 0.995 | up   | 0.0246   |
| <i>KIR3DL1</i> | 0.993 | 0.996 | down | -0.0058  |
| <i>SOCS3</i>   | 0.986 | 0.996 | down | -0.00553 |
| <i>MDC1</i>    | 0.991 | 0.996 | down | -0.00191 |
| <i>OPTN</i>    | 0.993 | 0.996 | down | -0.00164 |
| <i>IL10RB</i>  | 0.989 | 0.996 | up   | 0.00244  |
| <i>LTB</i>     | 0.99  | 0.996 | up   | 0.00757  |
| <i>CD69</i>    | 0.985 | 0.996 | up   | 0.00861  |
| <i>LOX</i>     | 0.997 | 0.997 | down | -0.00214 |
| <i>UNG</i>     | 0.997 | 0.997 | up   | 0.000736 |
