# Supplementary material for: Association between microenvironment‐related genes and prognosis of primary central nervous system lymphoma
Source: PubMed Central journal article supplement — EJHaem. 2024 Nov 14;5(6):1201–14. doi: 10.1002/jha2.1046 (PMC11647707; doi:10.1002/jha2.1046), 2024-11-14
Supplement: JHA2-5-1201-s005.pdf [file JHA2-5-1201-s005.pdf]

**Table S8. Association between gene mutations and patients' clinical course**

| <i>Gene</i>        |           | NRG | RG | P.value |
|--------------------|-----------|-----|----|---------|
| <i>MYD88 L265P</i> | mutant    | 4   | 4  | 0.678   |
|                    | wild type | 8   | 14 |         |
| <i>MYD88</i>       | mutant    | 2   | 2  | 1       |
|                    | wild type | 10  | 16 |         |
| <i>CD79B Y196X</i> | mutant    | 7   | 10 | 1       |
|                    | wild type | 5   | 8  |         |
| <i>CD79B</i>       | mutant    | 7   | 7  | 0.457   |
|                    | wild type | 5   | 11 |         |
| <i>PIM1</i>        | mutant    | 2   | 6  | 0.419   |
|                    | wild type | 10  | 12 |         |
| <i>BTG2</i>        | mutant    | 6   | 13 | 0.266   |
|                    | wild type | 6   | 5  |         |
| <i>TBL1XR1</i>     | mutant    | 10  | 15 | 1       |
|                    | wild type | 2   | 3  |         |
| <i>TOX</i>         | mutant    | 8   | 17 | 0.128   |
|                    | wild type | 4   | 1  |         |
| <i>B2M</i>         | mutant    | 10  | 17 | 0.548   |
|                    | wild type | 2   | 1  |         |
| <i>CARD11</i>      | mutant    | 10  | 15 | 1       |
|                    | wild type | 2   | 3  |         |
| <i>PRDM1</i>       | mutant    | 10  | 17 | 0.548   |
|                    | wild type | 2   | 1  |         |
| <i>TNFAIP3</i>     | mutant    | 11  | 16 | 1       |
|                    | wild type | 1   | 2  |         |
| <i>TMEM30A</i>     | mutant    | 11  | 17 | 1       |
|                    | wild type | 1   | 1  |         |
| <i>PRKCD</i>       | mutant    | 11  | 18 | 0.4     |
|                    | wild type | 1   | 0  |         |

RG: recurrence group; NRG: non-recurrence group
