# Supplementary material for: Association between microenvironment‐related genes and prognosis of primary central nervous system lymphoma
Source: PubMed Central journal article supplement — EJHaem. 2024 Nov 14;5(6):1201–14. doi: 10.1002/jha2.1046 (PMC11647707; doi:10.1002/jha2.1046), 2024-11-14
Supplement: JHA2-5-1201-s006.pdf [file JHA2-5-1201-s006.pdf]

**Supplementary Table 3. Clinical characteristics of patients included in the discovery cohort..**

| UPN | Age (yrs) | Sex    | Hans's classification | KPS | Involvement of deep brain | Deep brain lesions | Number of lesions | Altered mentation | Hemiparesis | Frontline treatment | Maximum tumor diameter | Relapse/refractory | Group | OS    | PFS  |
|-----|-----------|--------|-----------------------|-----|---------------------------|--------------------|-------------------|-------------------|-------------|---------------------|------------------------|--------------------|-------|-------|------|
| 1   | 32        | male   | GCB                   | 80  | Yes                       | (+)                | multiple          | (+)               | (-)         | HDMTX-based         | 25                     | (-)                | NRG   | 1269+ | 1269 |
| 2   | 65        | male   | non-GCB               | 90  | Yes                       | (+)                | single            | (-)               | (-)         | HDMTX-based         | 41                     | (-)                | NRG   | 2933+ | 2933 |
| 3   | 83        | female | non-GCB               | 50  | Yes                       | (+)                | multiple          | (-)               | (+)         | HDMTX-based         | 60                     | (-)                | NRG   | 74    | 74   |
| 4   | 74        | female | non-GCB               | 80  | Yes                       | (+)                | single            | (-)               | (-)         | HDMTX-based         | 30                     | (-)                | NRG   | 1166  | 1166 |
| 5   | 78        | male   | non-GCB               | 50  | Yes                       | (+)                | single            | (-)               | (-)         | HDMTX-based         | 42                     | (-)                | NRG   | 3304+ | 3304 |
| 6   | 74        | male   | non-GCB               | 50  | No                        | (-)                | single            | (-)               | (+)         | HDMTX-based         | 30                     | (-)                | NRG   | 2316+ | 2316 |
| 7   | 68        | male   | non-GCB               | 50  | Yes                       | (+)                | multiple          | (+)               | (+)         | HDMTX-based         | 39                     | (-)                | NRG   | 208   | 208  |
| 8   | 65        | male   | non-GCB               | 50  | No                        | (-)                | single            | (-)               | (-)         | HDMTX-based         | 20                     | (-)                | NRG   | 958   | 958  |
| 9   | 73        | male   | non-GCB               | 60  | Yes                       | (+)                | multiple          | (+)               | (+)         | HDMTX-based         | 35                     | (-)                | NRG   | 1913+ | 1913 |
| 10  | 68        | female | non-GCB               | 50  | Yes                       | (+)                | multiple          | (-)               | (-)         | HDMTX-based         | 18                     | (-)                | NRG   | 492   | 492  |
| 11  | 78        | male   | GCB                   | 70  | Yes                       | (+)                | multiple          | (-)               | (-)         | HDMTX-based         | 23                     | (-)                | NRG   | 2026+ | 2026 |
| 12  | 71        | male   | non-GCB               | 70  | Yes                       | (+)                | multiple          | (-)               | (+)         | HDMTX-based         | 30                     | (-)                | NRG   | 1326  | 1326 |
| 13  | 62        | female | non-GCB               | 70  | No                        | (-)                | single            | (+)               | (+)         | HDMTX-based         | 36                     | (+)                | RG    | 1986+ | 1082 |
| 14  | 76        | male   | non-GCB               | 40  | Yes                       | (+)                | single            | (+)               | (-)         | HDMTX-based         | 40                     | (+)                | RG    | 78    | 65   |
| 15  | 82        | female | GCB                   | 50  | No                        | (-)                | single            | (+)               | (+)         | HDMTX-based         | 45                     | (+)                | RG    | 170   | 73   |
| 16  | 67        | male   | non-GCB               | 40  | Yes                       | (+)                | multiple          | (+)               | (-)         | HDMTX-based         | 40                     | (+)                | RG    | 95    | 65   |
| 17  | 79        | male   | non-GCB               | 40  | No                        | (-)                | single            | (+)               | (+)         | Other               | 39                     | (+)                | RG    | 35    | 0    |
| 18  | 62        | female | non-GCB               | 70  | No                        | (-)                | multiple          | (+)               | (+)         | HDMTX-based         | 48                     | (+)                | RG    | 868   | 609  |
| 19  | 72        | female | non-GCB               | 30  | Yes                       | (+)                | single            | (+)               | (+)         | HDMTX-based         | 61                     | (+)                | RG    | 1093  | 728  |
| 20  | 78        | female | GCB                   | 50  | Yes                       | (+)                | single            | (-)               | (+)         | HDMTX-based         | 38                     | (+)                | RG    | 632   | 522  |
| 21  | 67        | female | non-GCB               | 30  | Yes                       | (+)                | multiple          | (+)               | (-)         | HDMTX-based         | 39                     | (+)                | RG    | 81    | 43   |
| 22  | 62        | female | non-GCB               | 40  | No                        | (-)                | multiple          | (+)               | (+)         | HDMTX-based         | 48                     | (+)                | RG    | 417   | 338  |
| 23  | 69        | male   | non-GCB               | 30  | Yes                       | (+)                | multiple          | (+)               | (+)         | HDMTX-based         | 40                     | (+)                | RG    | 339   | 62   |
| 24  | 69        | male   | non-GCB               | 60  | Yes                       | (+)                | multiple          | (-)               | (-)         | HDMTX-based         | 20                     | (+)                | RG    | 1108  | 386  |
| 25  | 62        | female | GCB                   | 60  | Yes                       | (+)                | multiple          | (+)               | (-)         | HDMTX-based         | 25                     | (+)                | RG    | 1655+ | 132  |
| 26  | 76        | male   | GCB                   | 50  | Yes                       | (+)                | single            | (+)               | (+)         | Other               | 38                     | (+)                | RG    | 160   | 160  |
| 27  | 68        | male   | non-GCB               | 50  | No                        | (-)                | multiple          | (+)               | (-)         | HDMTX-based         | 50                     | (+)                | RG    | 1433  | 466  |
| 28  | 63        | male   | non-GCB               | 40  | Yes                       | (+)                | single            | (+)               | (+)         | HDMTX-based         | 83                     | (+)                | RG    | 266   | 266  |
| 29  | 66        | male   | non-GCB               | 50  | Yes                       | (+)                | multiple          | (+)               | (+)         | HDMTX-based         | 20                     | (+)                | RG    | 428   | 207  |
| 30  | 74        | male   | non-GCB               | 20  | Yes                       | (+)                | multiple          | (+)               | (+)         | HDMTX-based         | 51                     | (+)                | RG    | 311   | 297  |

GCB; germinal center B-cell-like, HDMTX; high-dose methotrexate, NRG; non-recurrence group, RG; recurrence group, "+" alive at the cutoff point
