# Supplementary material for: Association between microenvironment‐related genes and prognosis of primary central nervous system lymphoma
Source: PubMed Central journal article supplement — EJHaem. 2024 Nov 14;5(6):1201–14. doi: 10.1002/jha2.1046 (PMC11647707; doi:10.1002/jha2.1046), 2024-11-14

**Supplementary Figure 2. Effects of somatic mutations on expression level of 770 neuroinflammation-related genes.**

**MYD88 L265P**

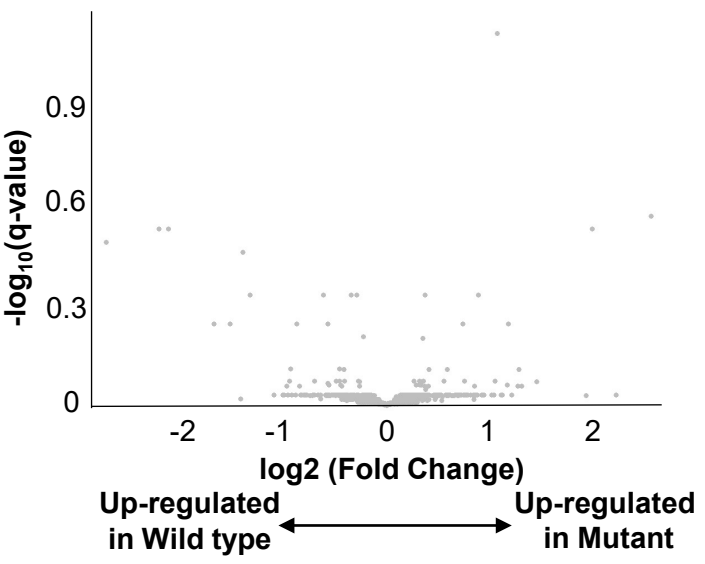

**MYD88**

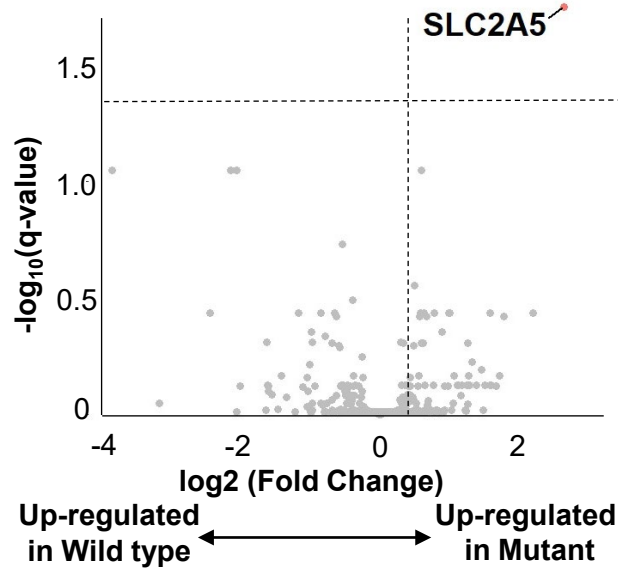

**CD79B Y196X**

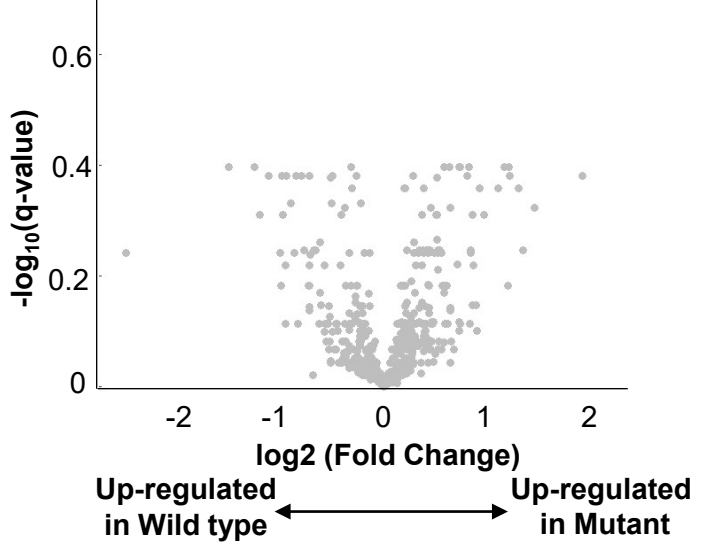

**CD79B**

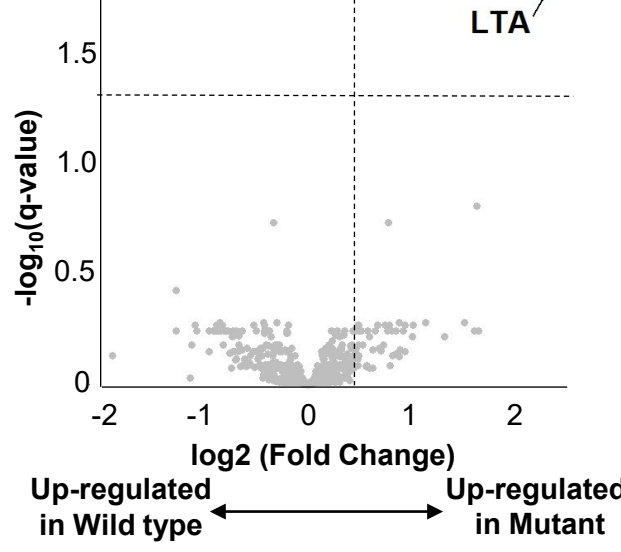

**PIM1**

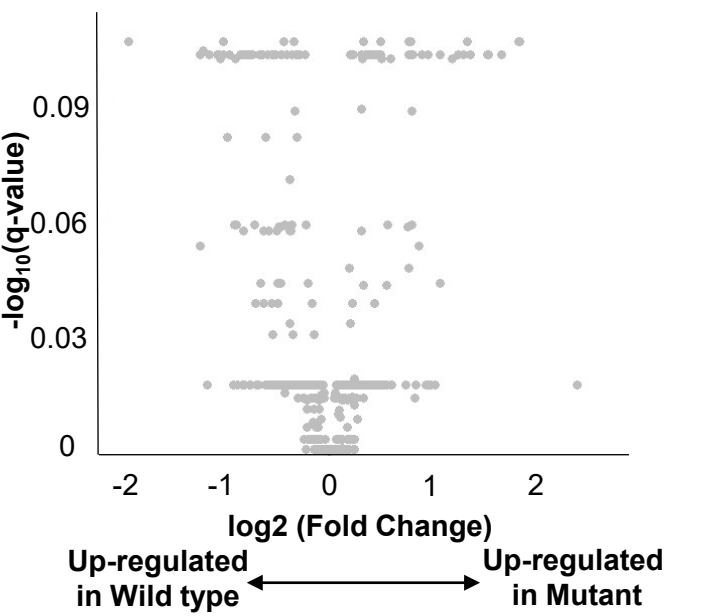

**BTG2**

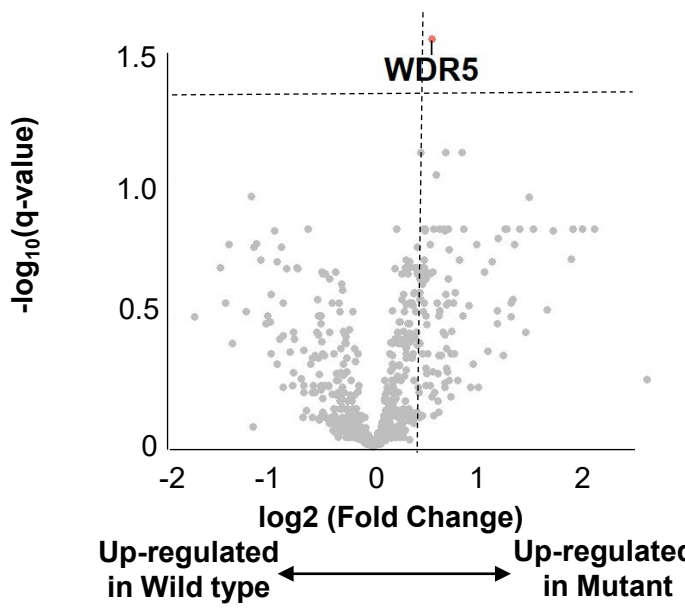

**Supplementary Figure 2. Effects of somatic mutations on expression level of 770 neuroinflammation-related genes.**

***TBL1XR1***

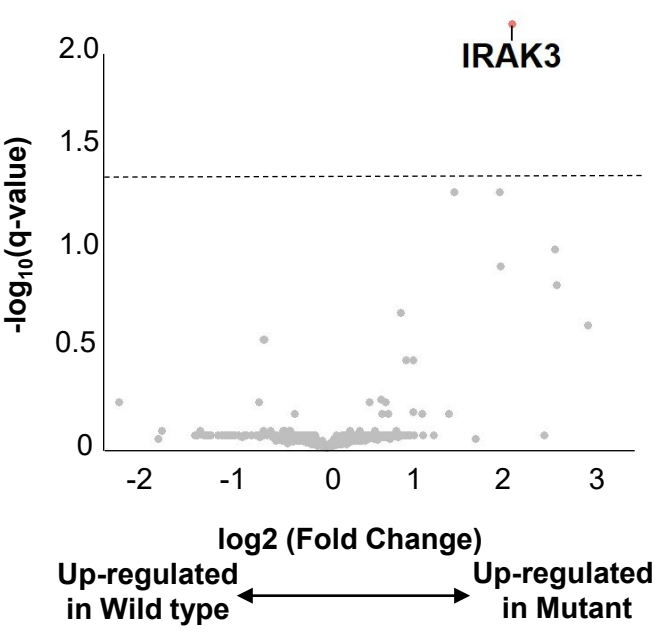

***TOX***

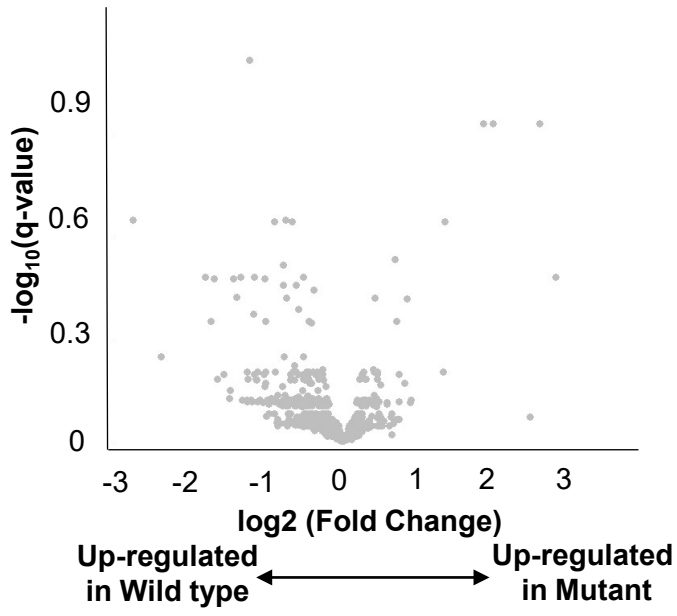

***CARD11***

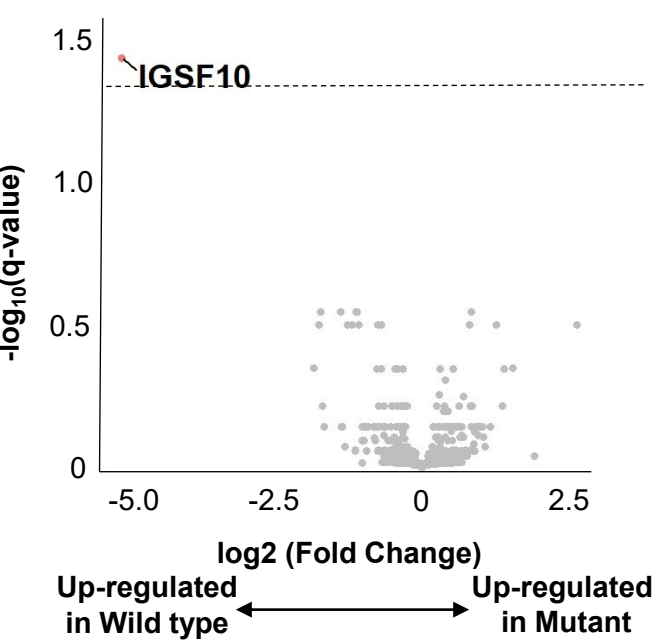

Supplement: JHA2-5-1201-s007.pdf [file JHA2-5-1201-s007.pdf]
