# Supplementary material for: Association between microenvironment‐related genes and prognosis of primary central nervous system lymphoma
Source: PubMed Central journal article supplement — EJHaem. 2024 Nov 14;5(6):1201–14. doi: 10.1002/jha2.1046 (PMC11647707; doi:10.1002/jha2.1046), 2024-11-14
Supplement: JHA2-5-1201-s008.pdf [file JHA2-5-1201-s008.pdf]

**Table S2. 12 candidate genes used in our in-house PCNSL panel**

*CD79B*

*CARD11*

*TOX*

*TNFAIP3*

*PIM1*

*TBL1XR1*

*MYD88*

*TMEM30A*

*PRDM1*

*PRKCD*

*B2M*

*BTG2*
