# Supplementary material for: Association between microenvironment‐related genes and prognosis of primary central nervous system lymphoma
Source: PubMed Central journal article supplement — EJHaem. 2024 Nov 14;5(6):1201–14. doi: 10.1002/jha2.1046 (PMC11647707; doi:10.1002/jha2.1046), 2024-11-14
Supplement: JHA2-5-1201-s009.pdf [file JHA2-5-1201-s009.pdf]

**Supplemental Table 6. Quantifications of immunoreactivity of IHC markers**

|       | Group | OLIG2 <sup>+</sup> Cell numbers (/mm <sup>2</sup> ) | CD68 <sup>+</sup> Area (%) | GFAP <sup>+</sup> Area (%) |
|-------|-------|-----------------------------------------------------|----------------------------|----------------------------|
| T2    | RG    | 99.20                                               | 2.64                       | 12.50                      |
| T4    | NRG   | 3.82                                                | 0.45                       | 11.04                      |
| T8    | RG    | 4.24                                                | 3.59                       | 6.65                       |
| T9    | RG    | 287.44                                              | 2.14                       | 5.70                       |
| TP100 | RG    | 397.66                                              | 11.25                      | 33.78                      |
| TP102 | NRG   | 48.33                                               | 0.78                       | 25.39                      |
| TP104 | RG    | 73.13                                               | 7.45                       | 5.03                       |
| TP105 | NRG   | 19.84                                               | 2.74                       | 0.57                       |
| TP106 | NRG   | 0.00                                                | 0.73                       | 0.17                       |
| TP110 | NRG   | 0.00                                                | 0.16                       | 0.00                       |
| TP12  | RG    | 99.84                                               | 3.61                       | 9.20                       |
| TP29  | RG    | 245.72                                              | 8.93                       | 16.93                      |
| TP31  | NRG   | 27.34                                               | 3.12                       | 5.56                       |
| TP35  | RG    | 116.37                                              | 3.21                       | 17.10                      |
| TP36  | RG    | 55.96                                               | 6.85                       | 6.25                       |
| TP38  | RG    | 44.94                                               | 3.97                       | 25.25                      |
| TP42  | RG    | 208.16                                              | 5.82                       | 13.38                      |
| TP43  | NRG   | 48.97                                               | 0.61                       | 0.44                       |
| TP46  | NRG   | 4.45                                                | 1.01                       | 6.15                       |
| TP48  | NRG   | 36.12                                               | 1.86                       | 1.93                       |
| TP49  | RG    | 20.35                                               | 4.59                       | 1.88                       |
| TP5   | NRG   | 0.00                                                | 5.25                       | 3.91                       |
| TP53  | RG    | 58.00                                               | 3.56                       | 2.73                       |
| TP77  | NRG   | 89.54                                               | 0.57                       | 9.18                       |
| TP80  | RG    | 17.81                                               | 5.95                       | 4.16                       |
| TP81  | RG    | 135.45                                              | 0.97                       | 5.16                       |
| TP82  | RG    | 161.27                                              | 3.16                       | 21.70                      |
| TP90  | RG    | 314.99                                              | 9.48                       | 39.08                      |
| TP94  | RG    | 69.53                                               | 0.90                       | 6.43                       |
| TP98  | NRG   | 0.00                                                | 0.33                       | 1.06                       |

RG: recurrence group; NRG: non-recurrence group
