# Supplementary material for: Association between microenvironment‐related genes and prognosis of primary central nervous system lymphoma
Source: PubMed Central journal article supplement — EJHaem. 2024 Nov 14;5(6):1201–14. doi: 10.1002/jha2.1046 (PMC11647707; doi:10.1002/jha2.1046), 2024-11-14
Supplement: JHA2-5-1201-s011.pdf [file JHA2-5-1201-s011.pdf]

Supplemental Table 1. Genes in Human\_Neuroinflammation\_kit

| Official Symbol | Accession      | Alias / Prev Symbol                              | Official Full Name                                            |
|-----------------|----------------|--------------------------------------------------|---------------------------------------------------------------|
| ABCC3           | NM_001144070.1 | MRP3,cMOAT2,EST90757,MLP2,MOAT-D                 | ATP binding cassette subfamily C member 3                     |
| ABCC8           | NM_000352.3    | HI,PHHI,SUR1,MRP8,ABC36,HHF1,TNDM2,SUR,HRINS     | ATP binding cassette subfamily C member 8                     |
| ABL1            | NM_005157.3    | JTK7,c-ABL,p150,ABL                              | ABL proto-oncogene 1, non-receptor tyrosine kinase            |
| ADAMTS16        | NM_139056.2    | ADAMTS16s                                        | ADAM metalloproteinase with thrombospondin type 1 motif 16    |
| ADRA2A          | NM_000681.2    | ADRAR,ADRA2,ADRA2R                               | adrenocortical alpha 2A                                       |
| AGO4            | NM_017629.3    | hAGO4,KIAA1567,FLJ20033,EIF2C4                   | argonaute 4, RISC catalytic component                         |
| AGT             | NM_000029.3    | SERPINA8                                         | angiotensinogen                                               |
| AK1             | NM_000476.2    |                                                  | adenylate kinase 1                                            |
| AKT1            | NM_001014432.1 | RAC,PKB,PRKBA,AKT                                | AKT serine/threonine kinase 1                                 |
| AKT2            | NM_001626.4    |                                                  | AKT serine/threonine kinase 2                                 |
| ALDH1L1         | NM_012190.2    | 10-FTHF,FTHFD                                    | aldehyde dehydrogenase 1 family member L1                     |
| AMBRA1          | NM_017749.2    | FLJ20294,KIAA1736,WDR94,DCAF3                    | autophagy and beclin 1 regulator 1                            |
| AMIGO2          | NM_001143668.1 | ALI1,DEGA                                        | adhesion molecule with Ig like domain 2                       |
| ANAPC15         | NM_001278486.1 | HSPC020,DKFZP564M082,APC15,C11orf51              | anaphase promoting complex subunit 15                         |
| ANXA1           | NM_000700.1    | ANX1,LPC1                                        | annexin A1                                                    |
| APC             | NM_000038.3    | DP2,DP3,DP2.5,PPP1R46                            | APC, WNT signaling pathway regulator                          |
| APEX1           | NM_001841.2    | APE,REF1,HAP1,APX,APEN,REF-1,APE-1,APEX          | apurinic/apyrimidinic endodeoxyribonuclease 1                 |
| APOE            | NM_000041.2    | AD2                                              | apolipoprotein E                                              |
| ARC             | NM_015193.3    | KIAA0278,Arg3.1                                  | activity regulated cytoskeleton associated protein            |
| ARHGAP24        | NM_031305.2    | DKFZP564B1162,FLJ33877,FIGAP                     | Rho GTPase activating protein 24                              |
| ARID1A          | NM_006015.4    | B120,P270,C10r4,BAF250,BAF250a,C1orf4,SMARCF1    | AT-rich interaction domain 1A                                 |
| ASB2            | NM_001202429.1 | ASB-2                                            | ankyrin repeat and SOCS box containing 2                      |
| ASH2L           | NM_001105214.2 | ASH2L2,ASH2,Bre2,ASH2L1                          | ASH2 like histone lysine methyltransferase complex subunit    |
| ASPH            | NM_032466.3    | CASQ2BP1,BAH,UJCN,HAHAH                          | aspartate beta-hydroxylase                                    |
| ATF3            | NM_001674.2    |                                                  | activating transcription factor 3                             |
| ATG14           | NM_014924.3    | ATG14L,KIAA0831                                  | autophagy related 14                                          |
| ATG3            | NM_022488.3    | PC3-96,FLJ22125,MGC15201,DKFZp564M1178,APG3L     | autophagy related 3                                           |
| ATG5            | NM_004849.2    | ASP,APG5,hAPG5,APG5L                             | autophagy related 5                                           |
| ATG7            | NM_001136031.2 | GSA7,DKFZp34N0735,APG7L                          | autophagy related 7                                           |
| ATG9A           | NM_001077198.1 | FLJ22169,APG9L1                                  | autophagy related 9A                                          |
| ATM             | NM_000051.3    | TEL1,TELO1,ATA,ATDC,ATC,ATD                      | ATM serine/threonine kinase                                   |
| ATP6V0E1        | NM_003945.3    | M9.2,ATP6H,ATP6V0E                               | ATPase H <sup>+</sup> transporting V0 subunit e1              |
| ATP6V1A         | NM_001690.2    | Vma1,VA68,VPP2,ATP6A1,ATP6V1A1                   | ATPase H <sup>+</sup> transporting V1 subunit A               |
| ATR             | NM_001184.2    | FRP1,SCKL,SCKL1,MCC1                             | ATR serine/threonine kinase                                   |
| AXL             | NM_021913.2    | UFO,JTK11,Tyro7,ARK                              | AXL receptor tyrosine kinase                                  |
| B3GNT5          | NM_032047.4    | B3GN-T5,beta3Gn-T5                               | UDP-GlcNAc:betaGal beta-1,3-N-acetylglucosaminyltransferase 5 |
| BAD             | NM_004322.3    | BCL2L8,BBC2                                      | BCL2 associated agonist of cell death                         |
| BAG3            | NM_004281.3    |                                                  | BCL2 associated athanogene 3                                  |
| BAG4            | NM_004874.2    | SODD                                             | BCL2 associated athanogene 4                                  |
| BAK1            | NM_001188.2    | BCL2L7,BAK,CDN1                                  | BCL2 antagonist/killer 1                                      |
| BARD1           | NM_000465.3    |                                                  | BRCA1 associated RING domain 1                                |
| BAX             | NM_138761.3    | BCL2L4                                           | BCL2 associated X, apoptosis regulator                        |
| BBC3            | NM_014417.2    | JFY1,PUMA                                        | BCL2 binding component 3                                      |
| BCAS1           | NM_003657.2    | NABC1,AIBC1                                      | breast carcinoma amplified sequence 1                         |
| BCL10           | NM_003921.2    | CARMEN,CIPER,mE10,c-E10,CLAP                     | B-cell CLL/lymphoma 10                                        |
| BCL2            | NM_000657.2    | Bcl-2,PPP1R50                                    | BCL2, apoptosis regulator                                     |
| BCL2A1          | NM_004049.2    | GRS,BFL1,BCL2L5,ACC-1,ACC-2,ACC2,ACC1,HBPA1      | BCL2 related protein A1                                       |
| BCL2L1          | NM_138578.1    | BCLX,BCL2L,Bcl-X,Bcl-xL,bcl-xS,PPP1R52           | BCL2 like 1                                                   |
| BCL2L11         | NM_138621.4    | BOD,BimL,BimEL,BimS,BIM                          | BCL2 like 11                                                  |
| BCL2L2          | NM_004050.2    | KIAA0271,BCL-W,PPP1R51                           | BCL2 like 2                                                   |
| BDNF            | NM_170732.4    |                                                  | brain derived neurotrophic factor                             |
| BECN1           | NM_003766.2    | ATG6,VPS30                                       | beclin 1                                                      |
| BID             | NM_197966.2    |                                                  | BH3 interacting domain death agonist                          |
| BIK             | NM_001197.3    | NBK                                              | BCL2 interacting killer                                       |
| BIN1            | NM_004305.2    | SH3P9,AMPH2,AMPHL                                | bridging integrator 1                                         |
| BIRC2           | NM_001166.3    | cIAP1,hiap-2,MIH8,RNF48,c-IAP1,API1              | baculoviral IAP repeat containing 2                           |
| BIRC3           | NM_182962.2    | cIAP2,hiap-1,MIH3,RNF49,MALT2,c-IAP2,API2        | baculoviral IAP repeat containing 3                           |
| BIRC5           | NM_001168.2    | EPR-1,survivin,API4                              | baculoviral IAP repeat containing 5                           |
| BLK             | NM_001715.2    | MGC10442                                         | BLK proto-oncogene, Src family tyrosine kinase                |
| BLM             | NM_000057.2    | BS,RECQL3,RECQ2                                  | Bloom syndrome RecQ like helicase                             |
| BLNK            | NM_013314.2    | SLP65,Ly57,SLP-65,BLNK-s,BASH,bca                | B-cell linker                                                 |
| BMI1            | NM_005180.5    | RNF51,PCGF4                                      | BMI1 proto-oncogene, polycomb ring finger                     |
| BNIP3           | NM_004052.2    | Nip3                                             | BCL2 interacting protein 3                                    |
| BNIP3L          | NM_004331.2    | Nix,BNIP3a                                       | BCL2 interacting protein 3 like                               |
| BOK             | NM_032515.3    | BCL2L9,BOKL,MGC4631                              | BOK, BCL2 family apoptosis regulator                          |
| BOLA2           | NM_001031827.1 | My016,BOLA2A                                     | boLA family member 2                                          |
| BRAF            | NM_004333.3    | BRAF1                                            | B-Raf proto-oncogene, serine/threonine kinase                 |
| BRCA1           | NM_007294.3    | RNF53,BRCC1,PPP1R53,FANCS                        | BRCA1, DNA repair associated                                  |
| BRD2            | NM_005104.2    | KIAA9001,RING3,D6S113E,NAT,FSRG1,BRD2-IT1        | bromodomain containing 2                                      |
| BRD3            | NM_007371.3    | RING3L,ORFX,KIAA0043                             | bromodomain containing 3                                      |
| BRD4            | NM_014299.2    | HUNKI,MCAP,CAP,HUNK1                             | bromodomain containing 4                                      |
| BTX             | NM_000061.1    | ATK,XLA,PSCTK1,AGMX1,IMD1                        | Brunton tyrosine kinase                                       |
| C10A            | NM_015991.2    |                                                  | complement C1q A chain                                        |
| C10B            | NM_000491.3    |                                                  | complement C1q B chain                                        |
| C10C            | NM_001114101.1 | C10G                                             | complement C1q C chain                                        |
| C3              | NM_000064.2    | CPAMD1,ARMOD9,C3a,C3b                            | complement C3                                                 |
| C3AR1           | NM_004054.2    | C3AR,AZ3B                                        | complement C3a receptor 1                                     |
| C4A             | NM_007293.2    | CPAMD2,C4S,CO4,C4,C4A3,C4A2,C4A4,C4A6,C4B,RG     | complement C4A (Rodgers blood group)                          |
| C5AR1           | NM_001736.2    | C5A,C5AR,CD88,C5R1                               | complement C5a receptor 1                                     |
| C6              | NM_000065.2    |                                                  | complement C6                                                 |
| CABLES1         | NM_001100619.2 | HsT2563,FLJ35924                                 | Cdk5 and Abl enzyme substrate 1                               |
| CALCOCO2        | NM_005831.3    | MGC17318,NDP52                                   | calcium binding and coiled-coil domain 2                      |
| CALR            | NM_004343.2    | RO,SSA,cC1qR,CRT,FLJ26680                        | calreticulin                                                  |
| CAMK4           | NM_001744.3    | CaMK-GR                                          | calcium/calmodulin dependent protein kinase IV                |
| CASP1           | NM_001223.3    | ICE,IL1BC                                        | caspase 1                                                     |
| CASP2           | NM_032982.2    | ICH1,PPP1R57,MGC2181,NEDD2                       | caspase 2                                                     |
| CASP3           | NM_032991.2    | CPP32,PPP32B,Yama,apopain                        | caspase 3                                                     |
| CASP4           | NM_001225.3    | ICE(rel)II,ICH-2,IX                              | caspase 4                                                     |
| CASP6           | NM_032992.2    | MCH2                                             | caspase 6                                                     |
| CASP7           | NM_001227.3    | MCH3,CMH-1,ICE-LAP3                              | caspase 7                                                     |
| CASP8           | NM_001228.4    | MCH5,MACH,FLICE,Casp-8                           | caspase 8                                                     |
| CASP9           | NM_011542270.1 | MCH6,ICE-LAP6,APAF-3,PPP1R56                     | caspase 9                                                     |
| CASS4           | NM_001164115.1 | HEFL,HEPL,C20orf32                               | Cas scaffolding protein family member 4                       |
| CCL2            | NM_002982.3    | MCP1,MCP-1,MCAP,SMC-CF,GDCF-2,HC11,MGC9434,SCYA2 | C-C motif chemokine ligand 2                                  |
| CCL3            | NM_002983.2    | G0S19-1,LD78ALPHA,MIP-1,alpha,SCYA3              | C-C motif chemokine ligand 3                                  |
| CCL4            | NM_002984.2    | MIP-1,beta,Act-2,AT744,1,LAG1,SCYA4              | C-C motif chemokine ligand 4                                  |
| CCL5            | NM_002985.2    | RANTES,SiSd,TCP228,MGC17164,D17S136E,SCYA5       | C-C motif chemokine ligand 5                                  |
| CCL7            | NM_006273.2    | MCP-3,NC28,FIC,MARC,MCP3,SCYA6,SCYA7             | C-C motif chemokine ligand 7                                  |
| CCNG2           | NM_004354.2    |                                                  | cyclin G2                                                     |
| CCNI            | NM_006835.2    | CCNI1                                            | cyclin I                                                      |
| CCR2            | NM_001123041.2 | CC-CR-2,CCR2,MCP-1-R,CD192,FLJ78302,CMKBR2       | C-C motif chemokine receptor 2                                |
| CCR5            | NM_000579.1    | CCR-5,CC-CR-5,CCR5,CD195,ITDM22,CMKBR5           | C-C motif chemokine receptor 5 (gene/pseudogene)              |
| CD109           | NM_133493.3    | FLJ38569,DKFZp762L1111,CPAMD7                    | CD109 molecule                                                |
| CD14            | NM_000591.2    |                                                  | CD14 molecule                                                 |
| CD163           | NM_004244.4    | M130,MM130,SCAR1                                 | CD163 molecule                                                |
| CD19            | NM_011545981.1 |                                                  | CD19 molecule                                                 |
| CD209           | NM_001144899.1 | DC-SIGN,CDSIGN,DC-SIGN1,CLEC4L                   | CD209 molecule                                                |
| CD24            | NM_013230.2    | CD24A                                            | CD24 molecule                                                 |
| CD244           | NM_001166663.1 | 2B4,NAIL,NKR2B4,Nmrk,SLAMF4                      | CD244 molecule                                                |
| CD300LF         | NM_139018.3    | JREM1,NKIR,IGSF13,CD300F,CLM1                    | CD300 molecule like family member f                           |
| CD33            | NM_001177608.1 | SIGLEC3,SIGLEC-3,p67,FLJ00391                    | CD33 molecule                                                 |
| CD36            | NM_000072.3    | SCARB3,GPVI,FAT,GP4,GP3B                         | CD36 molecule                                                 |
| CD3D            | NM_000732.4    | T3D                                              | CD3d molecule                                                 |
| CD3E            | NM_000733.2    |                                                  | CD3e molecule                                                 |
| CD3G            | NM_000073.2    |                                                  | CD3g molecule                                                 |
| CD40            | NM_001250.4    | p50,Bp50,TNFRSF5                                 | CD40 molecule                                                 |
| CD44            | NM_001001392.1 | IN,MC56,Pap1,CD44R,HCELL,CSPG6,MIC4,MDU2,MDU3    | CD44 molecule (Indian blood group)                            |
| CD47            | NM_001777.3    | IAP,OA3,MER6                                     | CD47 molecule                                                 |

|         |                |                                                                                                                                                            |                                                            |
|---------|----------------|------------------------------------------------------------------------------------------------------------------------------------------------------------|------------------------------------------------------------|
| CD6     | NM_001254751.1 | Trp120                                                                                                                                                     | CD6 molecule                                               |
| CD68    | NM_001251.2    | SCARD1, macroscialin, GP110, DKFZp686M18236, LAMP4                                                                                                         | CD68 molecule                                              |
| CD69    | NM_001781.1    | CLEC2C                                                                                                                                                     | CD69 molecule                                              |
| CD70    | NM_001252.2    | CD27L, CD27LG, TNFSF7                                                                                                                                      | CD70 molecule                                              |
| CD72    | NM_001782.2    | LYB2, CD72b                                                                                                                                                | CD72 molecule                                              |
| CD74    | NM_001025159.1 | DHLG                                                                                                                                                       | CD74 molecule                                              |
| CD83    | NM_004233.3    | HB15, BL11                                                                                                                                                 | CD83 molecule                                              |
| CD84    | NM_001184879.1 | SLAMF5, hCD84, mCD84                                                                                                                                       | CD84 molecule                                              |
| CD86    | NM_175862.3    | B7.2, B7-2, CD28LG2                                                                                                                                        | CD86 molecule                                              |
| CD8A    | NM_001768.5    | CD8                                                                                                                                                        | CD8a molecule                                              |
| CD8B    | NM_004931.3    | CD8B1                                                                                                                                                      | CD8b molecule                                              |
| CDC25A  | NM_001789.2    |                                                                                                                                                            | cell division cycle 25A                                    |
| CDC7    | NM_003503.2    | Hsk1, huCdc7, HsCdc7, CDC7L1                                                                                                                               | cell division cycle 7                                      |
| CDK20   | NM_012119.3    | p42, CCRK                                                                                                                                                  | cyclin dependent kinase 20                                 |
| CDKN1A  | NM_000389.2    | P21, CIP1, WAF1, SDI1, CAP20, p21CIP1, p21Cip1/Waf1, CDKN1                                                                                                 | cyclin dependent kinase inhibitor 1A                       |
| CDKN1C  | NM_001122631.1 | P57, KIP2, BWCR, BWS                                                                                                                                       | cyclin dependent kinase inhibitor 1C                       |
| CEACAM3 | NM_001277163.2 | CD66d, CGM1                                                                                                                                                | carcinoembryonic antigen related cell adhesion molecule 3  |
| CFLAR   | NM_001127183.1 | CASH, Casper, CLARP, FLAME, FLIP, I-FLICE, MRIT, c-FLIP, CASP8AP1                                                                                          | CASP8 and FADD like apoptosis regulator                    |
| CH25H   | NM_003956.3    |                                                                                                                                                            | cholesterol 25-hydroxylase                                 |
| CHEK1   | NM_001114121.1 | CHK1                                                                                                                                                       | checkpoint kinase 1                                        |
| CHEK2   | NM_001005735.1 | CDS1, CHK2, HuCds1, PP1425, bA444G7, RAD53                                                                                                                 | checkpoint kinase 2                                        |
| CHN2    | NM_004067.2    | ARHGAP3, RhoGAP3                                                                                                                                           | chimerin 2                                                 |
| CHST8   | NM_001127895.1 | GALNAC3-4-ST1                                                                                                                                              | carbohydrate sulfotransferase 8                            |
| CHUK    | NM_001278.3    | IKK1, IKK-alpha, IKBKA, NFKBKA, IKKA, TCF16                                                                                                                | conserved helix-loop-helix ubiquitous kinase               |
| CIDEA   | NM_001279.2    | CIDE-A                                                                                                                                                     | cell death-inducing DFFA-like effector a                   |
| CIDEB   | NM_014430.2    |                                                                                                                                                            | cell death-inducing DFFA-like effector b                   |
| CKS1B   | NM_001826.2    | ckshs1, CKS1                                                                                                                                               | CDC28 protein kinase regulatory subunit 1B                 |
| CLCF1   | NM_013246.2    | NNT1, BSF3, CLC, NR6, CISS2, BSF-3, NNT-1                                                                                                                  | cardiotrophin like cytokine factor 1                       |
| CLDN5   | NM_001130861.1 | CPETRL1, BEC1, AWAL, TMVCF                                                                                                                                 | claudin 5                                                  |
| CLEC7A  | NM_197954.2    | dectin-1, hDectin-1, CD369, SCARE2, CLECSF12                                                                                                               | C-type lectin domain containing 7A                         |
| CLIC4   | NM_013943.2    | DKFZP566G223, CLIC4L, P64H1, H1, huH1, p64H1                                                                                                               | chloride intracellular channel 4                           |
| CLN3    | NM_000086.2    | JNCL, BTN1, BTS                                                                                                                                            | CLN3, battenin                                             |
| CLSTN1  | NM_001009566.2 | CSTN1, KIAA0911, CDHR12                                                                                                                                    | calystenin 1                                               |
| CNN2    | NM_004368.3    |                                                                                                                                                            | calponin 2                                                 |
| CNP     | NM_033133.4    |                                                                                                                                                            | 2',3'-cyclic nucleotide 3' phosphodiesterase               |
| CNTNAP2 | NM_014141.4    | Caspr2, KIAA0868, NRXN4                                                                                                                                    | contactin associated protein like 2                        |
| COA5    | NM_001008215.2 | MGC52110, FLJ27524, Pet191, C2orf64                                                                                                                        | cytochrome c oxidase assembly factor 5                     |
| COL6A3  | NM_004369.3    |                                                                                                                                                            | collagen type VI alpha 3 chain                             |
| COTL1   | NM_021149.2    | CLP                                                                                                                                                        | coactosin like F-actin binding protein 1                   |
| COX5B   | NM_001862.2    |                                                                                                                                                            | cytochrome c oxidase subunit 5B                            |
| CP      | NM_000096.3    |                                                                                                                                                            | ceruloplasmin                                              |
| CPA3    | NM_001870.2    |                                                                                                                                                            | carboxypeptidase A3                                        |
| CREB1   | NM_004379.3    |                                                                                                                                                            | cAMP responsive element binding protein 1                  |
| CREBBP  | NM_004380.2    | RTS, CBP, KAT3A, RSTS                                                                                                                                      | CREB binding protein                                       |
| CREM    | NM_181571.2    | hCREM-2                                                                                                                                                    | cAMP responsive element modulator                          |
| CRIP1   | NM_001311.4    | CRIP                                                                                                                                                       | cysteine rich protein 1                                    |
| CRYBA4  | NM_001886.2    |                                                                                                                                                            | crystallin beta A4                                         |
| CSF1    | NM_000757.4    | M-CSF, MCSF, MGC31930                                                                                                                                      | colony stimulating factor 1                                |
| CSF1R   | NM_005211.2    | C-FMS, CSFR, CD115, FMS                                                                                                                                    | colony stimulating factor 1 receptor                       |
| CSF2RB  | NM_000395.2    | IL5RB, CD131, betaGMR, IL3RB                                                                                                                               | colony stimulating factor 2 receptor beta common subunit   |
| CSF3R   | NM_000760.3    | GCSEFR, CD114                                                                                                                                              | colony stimulating factor 3 receptor                       |
| CSK     | NM_004383.1    |                                                                                                                                                            | C-terminal Src kinase                                      |
| CST7    | NM_003650.3    |                                                                                                                                                            | cystatin F                                                 |
| CTSE    | NM_001910.2    |                                                                                                                                                            | cathepsin E                                                |
| CTSF    | NM_003793.3    | CATSF, CLN13                                                                                                                                               | cathepsin F                                                |
| CTSS    | NM_004079.3    |                                                                                                                                                            | cathepsin S                                                |
| CTSW    | NM_001335.3    |                                                                                                                                                            | cathepsin W                                                |
| CX3CL1  | NM_002996.3    | NTN, CX3kine, ABCD-3, CX3C, CX3C, fractalkine, neurotactin, SCYD1                                                                                          | C-X3-C motif chemokine ligand 1                            |
| CX3CR1  | NM_001337.3    | CMKDR1, V28, CCR1, GPR13, CMKBRL1                                                                                                                          | C-X3-C motif chemokine receptor 1                          |
| CXCL10  | NM_001565.2    | IF110, IP-10, crg-2, mob-1, C7, gIP-10, INP10, SCYB10                                                                                                      | C-X-C motif chemokine ligand 10                            |
| CXCL9   | NM_002416.1    | SCYB9, Humlg, crg-10, CMK, MIG                                                                                                                             | C-X-C motif chemokine ligand 9                             |
| CYCS    | NM_018947.4    | HCS, CYC                                                                                                                                                   | cytochrome c, somatic                                      |
| CYP27A1 | NM_000784.3    | CTX, CP27, CYP27                                                                                                                                           | cytochrome P450 family 27 subfamily A member 1             |
| CYP7B1  | NM_004820.3    | SPG5A                                                                                                                                                      | cytochrome P450 family 7 subfamily B member 1              |
| CYTI1   | NM_004288.4    | B3-1, HE, CYBR, CASP, CYTHIP, PSCDBP                                                                                                                       | cytohesin 1 interacting protein                            |
| DAB2    | NM_001343.2    | DOC-2                                                                                                                                                      | DAB2, clathrin adaptor protein                             |
| DAPK1   | NM_001288729.1 | DAPK, ROCO3                                                                                                                                                | death associated protein kinase 1                          |
| DBP2    | NM_000107.2    | DDDB, UV-DBP2, FLJ34321, XPE                                                                                                                               | deoxyribonucleic acid binding protein 2                    |
| DDX58   | NM_014314.3    | RIG-I, FLJ13599, DKFZp434J1111                                                                                                                             | DEX/DH-box helicase 58                                     |
| DICER1  | NM_177438.2    | Dicer, KIAA0928, K12H4, 8-LIKE, HERNA, MNG1                                                                                                                | dicer 1, ribonuclease III                                  |
| DLG1    | NM_001098424.1 | SAP97, SAP-97, hdlg, DLGH1, dJ1061C18.1.1                                                                                                                  | discs large MAGUK scaffold protein 1                       |
| DLG4    | NM_001365.3    | PSD-95, PSD95, SAP90, SAP-90                                                                                                                               | discs large MAGUK scaffold protein 4                       |
| DLX1    | NM_001038493.1 |                                                                                                                                                            | distal-less homeobox 1                                     |
| DLX2    | NM_004405.3    | TES-1                                                                                                                                                      | distal-less homeobox 2                                     |
| DNA2    | NM_001080449.1 | KIAA0083, DNA2L                                                                                                                                            | DNA replication helicase/nuclease 2                        |
| DNMT1   | NM_001379.2    | MCMT, CXXC9, DNMT                                                                                                                                          | DNA methyltransferase 1                                    |
| DNMT3A  | NM_022552.4    |                                                                                                                                                            | DNA methyltransferase 3 alpha                              |
| DNMT3B  | NM_175850.1    |                                                                                                                                                            | DNA methyltransferase 3 beta                               |
| DOCK1   | NM_001380.3    | DOCK180, ced5                                                                                                                                              | dedicator of cytokinesis 1                                 |
| DOCK2   | NM_004946.2    | KIAA0209                                                                                                                                                   | dedicator of cytokinesis 2                                 |
| DOT1L   | NM_032482.2    | KIAA1814, DOT1, KMT4                                                                                                                                       | DOT1 like histone lysine methyltransferase                 |
| DST     | NM_001723.4    | BP240, KIAA0728, FLJ21489, FLJ13425, FLJ32235, FLJ30627, CATX-15, BPA, MACF2, BPAG1                                                                        | dystonin                                                   |
| DUOXA1  | NM_001276265.1 | FLJ32334, NUMBIP, NIP, mol                                                                                                                                 | dual oxidase maturation factor 1                           |
| DUSP7   | NM_001947.2    | MKP-X, PYST2                                                                                                                                               | dual specificity phosphatase 7                             |
| E2F1    | NM_005225.1    | RBP3, RBBP3                                                                                                                                                | E2F transcription factor 1                                 |
| EED     | NM_003797.2    | WAIT-1, HEED                                                                                                                                               | embryonic ectoderm development                             |
| EEF2K   | NM_013302.3    | eEF-2K                                                                                                                                                     | eukaryotic elongation factor 2 kinase                      |
| EGFR    | NM_201282.1    | ERBB1, ERBB                                                                                                                                                | epidermal growth factor receptor                           |
| EGR1    | NM_001964.2    | TIS8, G0S30, NGFI-A, KROX-24, ZIF-268, AT225, ZNF225                                                                                                       | early growth response 1                                    |
| EHMT2   | NM_025256.5    | G9a, Em:AF134726.3, NG36/G9a, KMT1C, C6orf30, BAT8                                                                                                         | euchromatic histone lysine methyltransferase 2             |
| EIF1    | NM_005801.3    | EIF-1, ISO1, A121, SUI1, EIF1A                                                                                                                             | eukaryotic translation initiation factor 1                 |
| EMCN    | NM_016242.3    | MUC14                                                                                                                                                      | endomucin                                                  |
| EMP1    | NM_001423.1    | TMP, CL-20                                                                                                                                                 | epithelial membrane protein 1                              |
| ENPP6   | NM_153343.3    | MGC33971                                                                                                                                                   | ectonucleotide pyrophosphatase/phosphodiesterase 6         |
| ENTPD2  | NM_203468.1    | NTPDase-2, CD39L1                                                                                                                                          | ectonucleoside triphosphate diphosphohydrolase 2           |
| EOMES   | NM_005442.2    | TBR2                                                                                                                                                       | eomesodermin                                               |
| EP300   | NM_001429.2    | p300, KAT3B                                                                                                                                                | E1A binding protein p300                                   |
| EPCAM   | NM_002354.1    | Ly74, TROP1, GA733-2, EGP34, EGP40, EGP-2, KSA, CD326, Ep-CAM, HEA125, KS1/4, MK-1, MH99, MOC31, 323/A3, 17-1A, TACST-1, CO-17A, ESA, M4S1, MIC18, TACSTD1 | epithelial cell adhesion molecule                          |
| EPG5    | NM_020964.2    | hEPG5, KIAA1632                                                                                                                                            | ectopic P-granules autophagy protein 5 homolog             |
| EPST11  | NM_001002264.2 | BRESH1, MGC29634                                                                                                                                           | epithelial stromal interaction 1                           |
| ERBB3   | NM_001005915.1 | HER3, LCCS2                                                                                                                                                | erb-b2 receptor tyrosine kinase 3                          |
| ERCC2   | NM_000400.2    | MAG, EM9, MGC102762, MGC126218, MGC126219, TFIH, XPD                                                                                                       | ERCC excision repair 2, TFIH core complex helicase subunit |
| ESAM    | NM_138961.2    | W117m                                                                                                                                                      | endothelial cell adhesion molecule                         |
| ETS2    | NM_005239.4    |                                                                                                                                                            | ETS proto-oncogene 2, transcription factor                 |
| EXO1    | NM_003686.3    | HEX1, hExol                                                                                                                                                | exonuclease 1                                              |
| EZH1    | NM_001991.3    | KIAA0388, KMT6B                                                                                                                                            | enhancer of zeste 1 polycomb repressive complex 2 subunit  |
| EZH2    | NM_001203247.1 | EZH1, ENX-1, KMT6, KMT6A                                                                                                                                   | enhancer of zeste 2 polycomb repressive complex 2 subunit  |
| F3      | NM_001993.3    | CD142, TF                                                                                                                                                  | coagulation factor III, tissue factor                      |
| FA2H    | NM_024306.2    | FAAH, FLJ25287, FAXDC1, SPG35                                                                                                                              | fatty acid 2-hydroxylase                                   |
| FABP5   | NM_001444.1    | E-FABP, PA-FABP, KFABP                                                                                                                                     | fatty acid binding protein 5                               |
| FADD    | NM_003824.2    | MORT1, GIG3                                                                                                                                                | Fas associated via death domain                            |
| FANCC   | NM_001243743.1 | FAC, FA3, FACC                                                                                                                                             | Fanconi anemia complementation group C                     |
| FANCD2  | NM_033084.3    | FAD, FA-D2, FADC, FANCD                                                                                                                                    | Fanconi anemia complementation group D2                    |
| FANCG   | NM_004629.1    | FAG, XRCC9                                                                                                                                                 | Fanconi anemia complementation group G                     |
| FAS     | NM_000043.4    | CD95, APO-1, FAS1, APT1, TNFRSF6                                                                                                                           | Fas cell surface death receptor                            |
| FASLG   | NM_000639.1    | FasL, CD178, APT1LG1, TNFSF6                                                                                                                               | Fas ligand                                                 |
| FBLN5   | NM_006329.3    | EVEC, UP50, DANCE, ARMD3                                                                                                                                   | fibulin 5                                                  |
| FCAR    | NM_002000.2    | CD89                                                                                                                                                       | Fc fragment of IgA receptor                                |
| FCER1G  | NM_004106.1    |                                                                                                                                                            | Fc fragment of IgE receptor Ig                             |
| FCGR1A  | NM_000566.3    | CD64, CD64A                                                                                                                                                | Fc fragment of IgG receptor Ia                             |
| FCGR2B  | NM_001002273.1 | CD32, CD32B, FCG2, FCGR2                                                                                                                                   | Fc fragment of IgG receptor IIb                            |

|          |                |                                                                                                                                                                       |                                                              |
|----------|----------------|-----------------------------------------------------------------------------------------------------------------------------------------------------------------------|--------------------------------------------------------------|
| FCGR3A   | NM_000569.6    | CD16,CD16a,FCGR3,FCG3                                                                                                                                                 | Fc fragment of IgG receptor IIIa                             |
| FCRLA    | NM_001184866.1 | MGC4595,FCRLc2,FCRLb,FCRLc1,FCRLd,FCRLe,FCRLf,FCRLg,FCRLh,FCRLi,FCRLj,FCRLk,FCRLl,FCRLm,FCRLn,FCRLo,FCRLp,FCRLq,FCRLr,FCRLs,FCRLt,FCRLu,FCRLv,FCRLw,FCRLx,FCRLy,FCRLz | Fc receptor like A                                           |
| FCRLB    | NM_001002901.2 | FLJ31052,FCRL2,FREB-2,FCRLy,FCRLM2                                                                                                                                    | Fc receptor like B                                           |
| FDXR     | NM_004110.3    | ADXR                                                                                                                                                                  | ferredoxin reductase                                         |
| FEN1     | NM_004111.4    | FEN-1,MF1,RAD2                                                                                                                                                        | flap structure-specific endonuclease 1                       |
| FGD2     | NM_173558.3    | ZFYVE4                                                                                                                                                                | FYVE, RhoGEF and PH domain containing 2                      |
| FGF13    | NM_033642.1    | FHF2,FGF2                                                                                                                                                             | fibroblast growth factor 13                                  |
| FGL2     | NM_006682.2    | pT49,T49                                                                                                                                                              | fibrinogen like 2                                            |
| FKBP5    | NM_001145775.1 | FKBP51,FKBP54,PP1ase,P54,Ptg-10                                                                                                                                       | FK506 binding protein 5                                      |
| FLT1     | NM_002019.4    | VEGFR1,FLT                                                                                                                                                            | fms related tyrosine kinase 1                                |
| FOS      | NM_005252.2    | c-fos,AP-1                                                                                                                                                            | Fos proto-oncogene, AP-1 transcription factor subunit        |
| FOXP3    | NM_014009.3    | JM2,XPID,AIID,PIDX,DIETER,SCURFIN,IPEX                                                                                                                                | forkhead box P3                                              |
| FPR1     | NM_002029.3    | FPR,FMLP                                                                                                                                                              | formyl peptide receptor 1                                    |
| FSCN1    | NM_003088.2    | p55,FLJ38511,SNL                                                                                                                                                      | fascin actin-bundling protein 1                              |
| FYN      | NM_002037.3    | SYN,SLK,MGC45350                                                                                                                                                      | FYN proto-oncogene, Src family tyrosine kinase               |
| GADD45A  | NM_001924.2    | GADD45,DDIT1                                                                                                                                                          | growth arrest and DNA damage inducible alpha                 |
| GADD45G  | NM_006705.3    | DDIT2,GADD45gamma,GRP17,CR6                                                                                                                                           | growth arrest and DNA damage inducible gamma                 |
| GAL3ST1  | NM_004861.1    | CST                                                                                                                                                                   | galactose-3-O-sulfotransferase 1                             |
| GBA      | NM_001005742.2 | GBA1,GLUC                                                                                                                                                             | glucosylceramidase beta                                      |
| GBP2     | NM_004120.3    |                                                                                                                                                                       | guanylate binding protein 2                                  |
| GCLC     | NM_001498.2    | GCS,GLCLC,GLCL                                                                                                                                                        | glutamate-cysteine ligase catalytic subunit                  |
| GDPD2    | NM_001171191.1 | OBDFP,FLJ20207,GDE3                                                                                                                                                   | glycerophosphodiester phosphodiesterase domain containing 2  |
| GJA1     | NM_000165.3    | CX43,ODD,ODOD,SDTY3,ODDD,GJAL                                                                                                                                         | gap junction protein alpha 1                                 |
| GJB1     | NM_000166.5    | CX32,CMTX1,CMTX                                                                                                                                                       | gap junction protein beta 1                                  |
| GNA15    | NM_002068.1    | GNA16                                                                                                                                                                 | G protein subunit alpha 15                                   |
| GNL1     | NM_006433.2    | NKG5,LAG-2,D2S69E,TLA519,LAG2                                                                                                                                         | granulysin                                                   |
| GPR183   | NM_004951.3    | EBI2                                                                                                                                                                  | G protein-coupled receptor 183                               |
| GPR34    | NM_005300.2    |                                                                                                                                                                       | G protein-coupled receptor 34                                |
| GPR62    | NM_080865.2    |                                                                                                                                                                       | G protein-coupled receptor 62                                |
| GPR84    | NM_020370.1    | EX33                                                                                                                                                                  | G protein-coupled receptor 84                                |
| GRAP     | NM_001330148.1 |                                                                                                                                                                       | GRB2-related adaptor protein                                 |
| GRIA1    | NM_000827.3    | GluA1,GLURA,GLUR1                                                                                                                                                     | glutamate ionotropic receptor AMPA type subunit 1            |
| GRIA2    | NM_001083620.1 | GluA2,GLURB,GLUR2                                                                                                                                                     | glutamate ionotropic receptor AMPA type subunit 2            |
| GRIA4    | NM_000829.3    | GluA4,GLURD,GLUR4                                                                                                                                                     | glutamate ionotropic receptor AMPA type subunit 4            |
| GRIN2A   | NM_000833.3    | GluN2A,NMDAR2A                                                                                                                                                        | glutamate ionotropic receptor NMDA type subunit 2A           |
| GRIN2B   | NM_000834.3    | GluN2B,NMDAR2B                                                                                                                                                        | glutamate ionotropic receptor NMDA type subunit 2B           |
| GRM2     | NM_001130063.1 | GPRC1B,mGlu2,MGLUR2                                                                                                                                                   | glutamate metabotropic receptor 2                            |
| GRM3     | NM_000840.2    | GPRC1C,mGlu3,MGLUR3                                                                                                                                                   | glutamate metabotropic receptor 3                            |
| GRN      | NM_002087.2    | PCDGF,PRGN,CLN11                                                                                                                                                      | granulin precursor                                           |
| GSN      | NM_000177.4    | DKFZp313L0718                                                                                                                                                         | gelsolin                                                     |
| GSTM1    | NM_000561.2    | MU,H-B,GST1                                                                                                                                                           | glutathione S-transferase mu 1                               |
| GZMA     | NM_006144.2    | HFSF,CTLA3                                                                                                                                                            | granzyme A                                                   |
| GZMB     | NM_004131.3    | CCPI,CGL-1,CSP-B,CGL1,CTSG1,LHP,SECT,CTLA1,CSPB                                                                                                                       | granzyme B                                                   |
| H2AFX    | NM_002105.2    | H2AX                                                                                                                                                                  | H2A histone family member X                                  |
| HAT1     | NM_003842.2    | KAT1                                                                                                                                                                  | histone acetyltransferase 1                                  |
| HCAR2    | NM_177551.3    | HCA2,HM74A,PUMAG,Puma-g,NIACR1,GPR109A                                                                                                                                | hydroxycarboxylic acid receptor 2                            |
| HDAC1    | NM_004964.2    | HD1,GON-10,RPD3L1                                                                                                                                                     | histone deacetylase 1                                        |
| HDAC2    | NM_001527.1    | RPD3,YAF1                                                                                                                                                             | histone deacetylase 2                                        |
| HDAC4    | NM_006037.3    | KIAA0288,HDAC-A,HDACA,HD4,HA6116,HDAC-4,BDMR                                                                                                                          | histone deacetylase 4                                        |
| HDAC6    | NM_001321225.1 | KIAA0901,JM21,HD6,FLJ16239,PPP1R90                                                                                                                                    | histone deacetylase 6                                        |
| HDC      | NM_002112.3    |                                                                                                                                                                       | histidine decarboxylase                                      |
| HELLS    | NM_018063.3    | PASG,SMARCA6,LSH,Nbla10143                                                                                                                                            | helicase, lymphoid specific                                  |
| HIF1A    | NM_001530.2    | MOP1,HIF-1alpha,PASD8,HIF1,bHLHe78                                                                                                                                    | hypoxia inducible factor 1 alpha subunit                     |
| HILPDA   | NM_013332.1    | FLJ21076,HIG-2,HIG2,C7orf68                                                                                                                                           | hypoxia inducible lipid droplet associated                   |
| HIRA     | NM_003325.3    | DGCR1,TUP1,TUPLE1                                                                                                                                                     | histone cell cycle regulator                                 |
| HIST1H1D | NM_005320.2    | H1.3,H1d,H1s-2,H1F3                                                                                                                                                   | histone cluster 1 H1 family member d                         |
| HLA-E    | NM_005516.4    |                                                                                                                                                                       | major histocompatibility complex, class I, E                 |
| HMBG1    | NM_002128.4    | HMG3,SBP-1,DKFZp686A04236,HMG1                                                                                                                                        | high mobility group box 1                                    |
| HMOX1    | NM_002133.2    | bK286B10,HO-1                                                                                                                                                         | heme oxygenase 1                                             |
| HOMER1   | NM_004272.3    | Yes-1,SYN47,HOMER-1B                                                                                                                                                  | homer scaffolding protein 1                                  |
| HPGDS    | NM_014485.2    | GSTS,PGDS,H-PGDS,PGD2,GSTS1-1,GSTS1                                                                                                                                   | hematopoietic prostaglandin D synthase                       |
| HPRT1    | NM_000194.1    | HGPRT,HPRT                                                                                                                                                            | hypoxanthine phosphoribosyltransferase 1                     |
| HPS4     | NM_022081.5    | KIAA1667,LE,BLOC3S2                                                                                                                                                   | HPS4, biogenesis of lysosomal organelles complex 3 subunit 2 |
| HRK      | NM_003806.1    | DP5                                                                                                                                                                   | harakiri, BCL2 interacting protein                           |
| HSD11B1  | NM_181755.1    | SDR26C1,HSD11B,HSD11                                                                                                                                                  | hydroxysteroid 11-beta dehydrogenase 1                       |
| HSPB1    | NM_001540.3    | HSP27,HSP28,Hs.76067,Hsp25,CMT2F                                                                                                                                      | heat shock protein family B (small) member 1                 |
| HUS1     | NM_004507.2    |                                                                                                                                                                       | HUS1 checkpoint clamp component                              |
| ICAM2    | NM_000873.3    | CD102                                                                                                                                                                 | intercellular adhesion molecule 2                            |
| IFI30    | NM_006332.3    | IFI-30,GILT,IP30,MGC32056,IP-30                                                                                                                                       | IFI30, lysosomal thiol reductase                             |
| IFIH1    | NM_022168.2    | MDA-5,Hicd,MDA5,IDDM19                                                                                                                                                | interferon induced with helicase C domain 1                  |
| IFITM2   | NM_006435.2    | 1-8D                                                                                                                                                                  | interferon induced transmembrane protein 2                   |
| IFITM3   | NM_021034.2    | 1-8U                                                                                                                                                                  | interferon induced transmembrane protein 3                   |
| IFNAR1   | NM_000629.2    | IFRC,IFNAR                                                                                                                                                            | interferon alpha and beta receptor subunit 1                 |
| IFNAR2   | NM_000874.3    | IFNABR                                                                                                                                                                | interferon alpha and beta receptor subunit 2                 |
| IGF1     | NM_000618.3    | IGF1A,IGF1,IGF-1                                                                                                                                                      | insulin like growth factor 1                                 |
| IGF1R    | NM_000875.4    | JTK13,CD221,IGFIR,MGC18216,IGFR                                                                                                                                       | insulin like growth factor 1 receptor                        |
| IGF2R    | NM_000876.1    | CD222,MPIR,MPIR1,CIMPR,M6P-R,C1-M6PR,C1-MPR,MPR300                                                                                                                    | insulin like growth factor 2 receptor                        |
| IGSF10   | NM_001178146.1 | FLJ25972,CMF608                                                                                                                                                       | immunoglobulin superfamily member 10                         |
| IGSF6    | NM_005849.2    | DORA                                                                                                                                                                  | immunoglobulin superfamily member 6                          |
| IKKB     | NM_001556.1    | IKK2,NFKBKB,IKK-beta,IKKB                                                                                                                                             | inhibitor of nuclear factor kappa B kinase subunit beta      |
| IKBE     | NM_014002.2    | IKKE,IKK-i,KIA0151                                                                                                                                                    | inhibitor of nuclear factor kappa B kinase subunit epsilon   |
| IKBK     | NM_003639.2    | IKK-gamma,NEMO,Fip3p,FIP-3,FIP3,ZC2HC9,IP2,IP1                                                                                                                        | inhibitor of nuclear factor kappa B kinase subunit gamma     |
| IL10RB   | NM_000628.3    | CRF2-4,CDW210B,IL-10R2,CRFB4,D21S58,D21S66                                                                                                                            | interleukin 10 receptor subunit beta                         |
| IL15RA   | NM_002189.2    | CD215,IL-15RA                                                                                                                                                         | interleukin 15 receptor subunit alpha                        |
| IL1A     | NM_000575.3    | IL1F1,IL-1A,IL1-ALPHA,IL1                                                                                                                                             | interleukin 1 alpha                                          |
| IL1B     | NM_000576.2    | IL1F2,IL-1B,IL1-BETA                                                                                                                                                  | interleukin 1 beta                                           |
| IL1R1    | NM_001320984.1 | D2S1473,CD121A,IL1R,IL1RA                                                                                                                                             | interleukin 1 receptor type 1                                |
| IL1R2    | NM_173343.1    | CD121b,IL1RB                                                                                                                                                          | interleukin 1 receptor type 2                                |
| IL1RAP   | NM_002182.2    | IL-1RAcP,IL1R3,C3orf13                                                                                                                                                | interleukin 1 receptor accessory protein                     |
| IL1RL2   | NM_003854.2    | IL1R-tp2,IL1RRP2                                                                                                                                                      | interleukin 1 receptor like 2                                |
| IL1RN    | NM_000577.3    | IL1RA,ICIL-1RA,IL1F3,IRAP,IL-1RN,MGC10430                                                                                                                             | interleukin 1 receptor antagonist                            |
| IL21R    | NM_181079.4    | CD360                                                                                                                                                                 | interleukin 21 receptor                                      |
| IL2RG    | NM_000206.1    | CD132,SCIDX1,IMD4,CIDX                                                                                                                                                | interleukin 2 receptor subunit gamma                         |
| IL3      | NM_000588.3    | IL-3,MULTI-CSF,MCGF,MGC79398,MGC79399                                                                                                                                 | interleukin 3                                                |
| IL3RA    | NM_002183.2    | CD123                                                                                                                                                                 | interleukin 3 receptor subunit alpha                         |
| IL6R     | NM_000565.2    | CD126                                                                                                                                                                 | interleukin 6 receptor                                       |
| INPP5D   | NM_005541.3    | SHIP,hp51CN,SHIP1                                                                                                                                                     | inositol polyphosphate-5-phosphatase D                       |
| IQSEC1   | NM_014869.4    | KIAA0763,GEP100,BRAG2,ARF,GEP100                                                                                                                                      | IQ motif and Sec7 domain 1                                   |
| IRAK1    | NM_001569.3    | IRAK,pelle                                                                                                                                                            | interleukin 1 receptor associated kinase 1                   |
| IRAK2    | NM_001570.3    |                                                                                                                                                                       | interleukin 1 receptor associated kinase 2                   |
| IRAK3    | NM_007199.1    | IRAK-M                                                                                                                                                                | interleukin 1 receptor associated kinase 3                   |
| IRAK4    | NM_016123.1    | NY-REN-84                                                                                                                                                             | interleukin 1 receptor associated kinase 4                   |
| IRF1     | NM_002198.1    | MAR                                                                                                                                                                   | interferon regulatory factor 1                               |
| IRF2     | NM_002199.3    |                                                                                                                                                                       | interferon regulatory factor 2                               |
| IRF3     | NM_001571.5    |                                                                                                                                                                       | interferon regulatory factor 3                               |
| IRF4     | NM_002460.1    | LSIRF,MUM1                                                                                                                                                            | interferon regulatory factor 4                               |
| IRF6     | NM_006147.2    | OFC6,VVSI1,VWS,LPS                                                                                                                                                    | interferon regulatory factor 6                               |
| IRF7     | NM_001572.3    |                                                                                                                                                                       | interferon regulatory factor 7                               |
| IRF8     | NM_002163.2    | IRF-8,ICSBP,ICSBP1                                                                                                                                                    | interferon regulatory factor 8                               |
| ISLR2    | NM_001130136.1 | KIAA1465                                                                                                                                                              | immunoglobulin superfamily containing leucine rich repeat 2  |
| ITGA6    | NM_000210.1    | CD49f                                                                                                                                                                 | integrin subunit alpha 6                                     |
| ITGA7    | NM_002206.1    |                                                                                                                                                                       | integrin subunit alpha 7                                     |
| ITGAM    | NM_000632.3    | MAC-1,CD11b,CR3A,CD11B                                                                                                                                                | integrin subunit alpha M                                     |
| ITGAV    | NM_002210.2    | CD51,VNRA,MSK8,VTNR                                                                                                                                                   | integrin subunit alpha V                                     |
| ITGAX    | NM_000887.4    | CD11c,CD11C                                                                                                                                                           | integrin subunit alpha X                                     |
| ITGB5    | NM_002213.3    |                                                                                                                                                                       | integrin subunit beta 5                                      |
| JAG1     | NM_000214.2    | AHD,AWS,HJ1,CD339,AGS,JAGL1                                                                                                                                           | jagged 1                                                     |
| JAM2     | NM_001270407.1 | VE-JAM,JAM-B,JAMB,CD322,C21orf43                                                                                                                                      | junctional adhesion molecule 2                               |
| JARID2   | NM_001267040.1 | JMJ                                                                                                                                                                   | jumonji and AT-rich interaction domain containing 2          |
| JUN      | NM_002228.3    | c-Jun,AP-1                                                                                                                                                            | Jun proto-oncogene, AP-1 transcription factor subunit        |
| KAT2A    | NM_021078.2    | GCN5,PCAF-b,GCN5L2                                                                                                                                                    | lysine acetyltransferase 2A                                  |
| KAT2B    | NM_003884.3    | P/CAF,GCN5,GCN5L,PCAF                                                                                                                                                 | lysine acetyltransferase 2B                                  |

|          |                |                                                                               |                                                                                        |
|----------|----------------|-------------------------------------------------------------------------------|----------------------------------------------------------------------------------------|
| KCND1    | NM_004979.4    | Kv4.1                                                                         | potassium voltage-gated channel subfamily D member 1                                   |
| KCNJ10   | NM_002241.4    | Kir4.1,Kir1.2                                                                 | potassium voltage-gated channel subfamily J member 10                                  |
| KCNK13   | NM_022054.2    | K2p13.1,THIK-1,THIK1                                                          | potassium two pore domain channel subfamily K member 13                                |
| KDM1A    | NM_015013.3    | KIAA0601,BHC110,LSL1,AOF2,KDM1                                                | lysine demethylase 1A                                                                  |
| KDM1B    | NM_153042.3    | FLJ34109,FLJ33898,dJ298J15.2,bA204B7.3,FLJ43328,LSL2,C6orf193,AOF1            | lysine demethylase 1B                                                                  |
| KDM2A    | NM_012308.1    | KIAA1004,FBL11,LILINA,DKFZP434M175,FBL7,FLJ00115,CXXC8,JHDM1A,FBXL11          | lysine demethylase 2A                                                                  |
| KDM2B    | NM_001005366.1 | PCCX2,CXXC2,Fbi10,JHDM1B,FBXL10                                               | lysine demethylase 2B                                                                  |
| KDM3A    | NM_018433.5    | TSGA,KIAA0742,JHDM2A,JMJD1,JMJD1A                                             | lysine demethylase 3A                                                                  |
| KDM3B    | NM_016604.3    | KIAA1082,NET22,C5orf7,JMJD1B                                                  | lysine demethylase 3B                                                                  |
| KDM4A    | NM_014663.2    | KIAA0677,JHDM3A,TDRD14A,JMJD2,JMJD2A                                          | lysine demethylase 4A                                                                  |
| KDM4B    | NM_015015.2    | KIAA0876,TDRD14B,JMJD2B                                                       | lysine demethylase 4B                                                                  |
| KDM4C    | NM_001146694.1 | GASC1,KIAA0780,TDRD14C,JMJD2C                                                 | lysine demethylase 4C                                                                  |
| KDM4D    | NM_018039.2    | FLJ10251,JMJD2D                                                               | lysine demethylase 4D                                                                  |
| KDM5A    | NM_001042603.1 | RBBP2,JARID1A                                                                 | lysine demethylase 5A                                                                  |
| KDM5B    | NM_006618.3    | RBBP2H1A,PLU-1,CT31,PPP1R98,JARID1B                                           | lysine demethylase 5B                                                                  |
| KDM5C    | NM_004187.2    | DXS1272E,XE169,SMCX,JARID1C,MRX13                                             | lysine demethylase 5C                                                                  |
| KDM5D    | NM_001146705.1 | KIAA0234,HYA,HY,SMCY,JARID1D                                                  | lysine demethylase 5D                                                                  |
| KDM6A    | NM_021140.2    | UTX                                                                           | lysine demethylase 6A                                                                  |
| KIF2C    | NM_006845.3    | MCAK,CT139,KNLS6                                                              | kinesin family member 2C                                                               |
| KIR3DL1  | NM_013289.2    | cl-2,NKB1,cl-11,nkat3,NKB1B,AMB11,CD158e1/2,CD158E1,CD158e2,KIR               | killer cell immunoglobulin like receptor, three Ig domains and long cytoplasmic tail 1 |
| KIT      | NM_000222.2    | CD117,SCFR,C-KIT,PBT                                                          | KIT proto-oncogene receptor tyrosine kinase                                            |
| KLRB1    | NM_002258.2    | CD161,NKR-P1,NKR-P1A,hNKR-P1A,CLEC5B,NKR                                      | killer cell lectin like receptor B1                                                    |
| KLRD1    | NM_007334.2    | CD94                                                                          | killer cell lectin like receptor D1                                                    |
| KLRK1    | NM_007360.1    | NKG2D,KLR,NKG2-D,CD314,D12S2489E                                              | killer cell lectin like receptor K1                                                    |
| KMT2A    | NM_005933.2    | TRX1,HRX,ALL-1,HTRX1,CXXC7,MLL1A,MLL                                          | lysine methyltransferase 2A                                                            |
| KMT2C    | NM_170606.2    | KIAA1506,HALR,MLL3                                                            | lysine methyltransferase 2C                                                            |
| LACC1    | NM_001128303.1 | FLJ38725,FAMIN,C13orf31                                                       | laccase domain containing 1                                                            |
| LAG3     | NM_002286.5    | CD223                                                                         | lymphocyte activating 3                                                                |
| LAIR1    | NM_002287.3    | CD305                                                                         | leukocyte associated immunoglobulin like receptor 1                                    |
| LAMP1    | NM_005561.3    | CD107a                                                                        | lysosomal associated membrane protein 1                                                |
| LAMP2    | NM_002294.2    | CD107b                                                                        | lysosomal associated membrane protein 2                                                |
| LCN2     | NM_005564.3    | NGAL_24p3                                                                     | lipocalin 2                                                                            |
| LDHA     | NM_001165414.1 |                                                                               | lactate dehydrogenase A                                                                |
| LDLRAD3  | NM_174902.2    | LRAD3                                                                         | low density lipoprotein receptor class A domain containing 3                           |
| LFNG     | NM_001040168.1 | SCDO3                                                                         | LFNG O-fucosylpeptide 3-beta-N-acetylglucosaminyltransferase                           |
| LGMN     | NM_001008530.2 | LGMN1,PRSC1                                                                   | legumain                                                                               |
| LIG1     | NM_000234.1    |                                                                               | DNA ligase 1                                                                           |
| LILRB4   | NM_001278426.3 | LIR-5,ILT3,HM18,LIR5,CD85k                                                    | leukocyte immunoglobulin like receptor B4                                              |
| LINGO1   | NM_032808.5    | FLJ14594,LERN1,LRRN6A                                                         | lysine rich repeat and Ig domain containing 1                                          |
| LMNA     | NM_005572.2    | HGPS,MADA,LMN1,CMD1A,LGMDB1,PRO1,LMNL1                                        | lamin A/C                                                                              |
| LMNB1    | NM_005573.2    |                                                                               | lamin B1                                                                               |
| LOX      | NM_002317.4    |                                                                               | lysyl oxidase                                                                          |
| LRG1     | NM_052972.2    | LRG                                                                           | leucine rich alpha-2-glycoprotein 1                                                    |
| LRRC25   | NM_145256.2    | MAPA,FLJ38116                                                                 | leucine rich repeat containing 25                                                      |
| LRRC3    | NM_030891.3    | C21orf102                                                                     | leucine rich repeat containing 3                                                       |
| LSR      | NM_205835.3    | LISCH7,ILDR3                                                                  | lipolysis stimulated lipoprotein receptor                                              |
| LST1     | NM_007161.3    | LST-1,B144,D6S49E                                                             | leukocyte specific transcript 1                                                        |
| LTA      | NM_000595.2    | TNFSF1,TNLT,TFNB                                                              | lymphotoxin alpha                                                                      |
| LTB      | NM_002341.1    | p33,TNFSF3,TNFC                                                               | lymphotoxin beta                                                                       |
| LTBR     | NM_006718983.2 | TNFCR,TNFR-RP,TNFR2-RP,TNF-R-III,TNFRSF3,D12S370                              | lymphotoxin beta receptor                                                              |
| LTC4S    | NM_145867.1    | MGC33147                                                                      | leukotriene C4 synthase                                                                |
| LY9      | NM_001033667.1 | CD229,mLY9,SLAMF3,hlly9                                                       | lymphocyte antigen 9                                                                   |
| LYN      | NM_002350.3    | JTK8                                                                          | LYN proto-oncogene, Src family tyrosine kinase                                         |
| MAFB     | NM_005461.3    | KRML                                                                          | MAF bZIP transcription factor B                                                        |
| MAFF     | NM_001161572.1 | hMaF                                                                          | MAF bZIP transcription factor F                                                        |
| MAG      | NM_001199216.1 | SIGLEC4A,SIGLEC-4A,S-MAG,GMA                                                  | myelin associated glycoprotein                                                         |
| MAL      | NM_002371.2    |                                                                               | mal, T-cell differentiation protein                                                    |
| MAN2B1   | NM_001173498.1 | LAMAN,MANB                                                                    | mannosidase alpha class 2B member 1                                                    |
| MAP1LC3A | NM_032514.2    | MAP1BLC3,MAP1ALC3,LC3,LC3A,ATG8E                                              | microtubule associated protein 1 light chain 3 alpha                                   |
| MAP2K1   | NM_002755.2    | MEK1,MAPKK1,PRKMK1                                                            | mitogen-activated protein kinase kinase 1                                              |
| MAP2K4   | NM_003010.3    | MEK4,JNKK1,PRKMK4,MKK4,SERK1                                                  | mitogen-activated protein kinase kinase 4                                              |
| MAP3K1   | NM_005921.1    | MEKK,MAPKKK1,MEKK1                                                            | mitogen-activated protein kinase kinase kinase 1                                       |
| MAP3K14  | NM_003954.1    | NIK,HSNIK,FTDCR1B,HS                                                          | mitogen-activated protein kinase kinase kinase 14                                      |
| MAPK10   | NM_138981.2    | JNK3,p493f12,p54bSAPK,PRKM10                                                  | mitogen-activated protein kinase 10                                                    |
| MAPK12   | NM_002969.3    | ERK6,PRKM12,p38gamma,SAPK-3,SAPK3                                             | mitogen-activated protein kinase 12                                                    |
| MAPK14   | NM_001315.2    | PRKM14,p38,Nki2,PRKM15,CSPB1,CSPB2                                            | mitogen-activated protein kinase 14                                                    |
| MAPT     | NM_016834.3    | MTBT1,tau,PPND,FTDP-17,TAU,MSTD,MTBT2,FLJ31424,MGC138549,PPP1R103,DDPAC,MAPTL | microtubule associated protein tau                                                     |
| MARCO    | NM_006770.3    | SCARA2,SR-A6                                                                  | macrophage receptor with collagenous structure                                         |
| MAVS     | NM_020746.3    | VISA,KIAA1271,IPS-1,Cardif                                                    | mitochondrial antiviral signaling protein                                              |
| MB21D1   | NM_138441.2    | CGAS,C6orf150,"chromosome 6 open reading frame 150"                           | Mab-21 domain containing 1                                                             |
| MBD2     | NM_003927.3    |                                                                               | methyl-CpG binding domain protein 2                                                    |
| MBD3     | NM_001281453.1 |                                                                               | methyl-CpG binding domain protein 3                                                    |
| MCM2     | NM_004526.2    | D3S3194,KIAA0030,BM28,cdc19,DFNA70,CCNL1,CDCL1                                | minichromosome maintenance complex component 2                                         |
| MCM5     | NM_006739.3    | CDC46                                                                         | minichromosome maintenance complex component 5                                         |
| MCM6     | NM_005915.4    | Mis5                                                                          | minichromosome maintenance complex component 6                                         |
| MDC1     | NM_014641.2    | NFBD1,KIAA0170,Emr,AB023051.5                                                 | mediator of DNA damage checkpoint 1                                                    |
| MDM2     | NM_001145337.1 | HDM2,MGC5370                                                                  | MDM2 proto-oncogene                                                                    |
| MEF2C    | NM_002397.3    |                                                                               | myocyte enhancer factor 2C                                                             |
| MERTK    | NM_006343.2    | mer,RP38,c-Eyk,Tyro12                                                         | MER proto-oncogene, tyrosine kinase                                                    |
| MFG8     | NM_001114614.1 | SED1,EDIL1,BA46,OAcGD3S,HsT19888,MFG-E8,hP47,SPAG10                           | milk fat globule-EGF factor 8 protein                                                  |
| MGMT     | NM_002412.3    |                                                                               | O-6-methylguanine-DNA methyltransferase                                                |
| MMP12    | NM_002426.3    | HME                                                                           | matrix metalloproteinase 12                                                            |
| MMP14    | NM_004995.2    | MT1-MMP                                                                       | matrix metalloproteinase 14                                                            |
| MOBP     | NR_003090.2    |                                                                               | myelin-associated oligodendrocyte basic protein                                        |
| MOG      | NM_001008228.2 | BTN6,BTNL11                                                                   | myelin oligodendrocyte glycoprotein                                                    |
| MPEG1    | NM_001015052.1 | MPG1                                                                          | macrophage expressed 1                                                                 |
| MPG      | NM_001015052.1 | MDG                                                                           | N-methylpurine DNA glycosylase                                                         |
| MR1      | NM_001531.2    | HLALS                                                                         | major histocompatibility complex, class I-related                                      |
| MRE11    | NM_005591.3    | ATLD,MRE11A                                                                   | MRE11 homolog, double strand break repair nuclease                                     |
| MS4A1    | NM_152866.2    | B1,Bp35,MS4A2,CD20                                                            | membrane spanning 4-domains A1                                                         |
| MS4A2    | NM_000139.3    | MS4A1,FCER1B,IGER,APY                                                         | membrane spanning 4-domains A2                                                         |
| MS4A4A   | NM_024021.2    | CD20L1,MS4A7,MS4A4                                                            | membrane spanning 4-domains A4A                                                        |
| MSH2     | NM_000251.1    | HNPCC,HNPCC1,COCA1                                                            | mutS homolog 2                                                                         |
| MSN      | NM_002444.2    |                                                                               | moesin                                                                                 |
| MSR1     | NM_002445.3    | SCARA1,CD204,SR-AI,SR-AII,SR-AIII,SR-IV                                       | macrophage scavenger receptor 1                                                        |
| MVP      | NM_017458.2    | LRP,VAULT1                                                                    | major vault protein                                                                    |
| MYC      | NM_002467.3    | c-Myc,bHLHe39,MYCC                                                            | MYC proto-oncogene, bHLH transcription factor                                          |
| MYCT1    | NM_025107.2    | MTLC,FLJ21269                                                                 | MYC target 1                                                                           |
| MYD88    | NM_002468.3    |                                                                               | myeloid differentiation primary response 88                                            |
| MYORG    | NM_020702.3    | KIAA1161                                                                      | myogenesis regulating glycosidase (putative)                                           |
| MYRF     | NM_001127392.1 | Ndt80,pqn-47,MRF,C11orf9                                                      | myelin regulatory factor                                                               |
| NBN      | NM_002485.4    | ATV,AT-V2,AT-V1,NBS,NBS1                                                      | nibrin                                                                                 |
| NCAPH    | NM_015341.3    | CAP-H,hCAP-H,BRRN1                                                            | non-SMC condensin I complex subunit H                                                  |
| NCF1     | NM_000265.4    | p47phox,NOX2,NCF1A,SH3PX1D1A                                                  | neutrophil cytosolic factor 1                                                          |
| NCOR1    | NM_006311.3    | N-CoR,hCIT52910,TRAC1,hN-CoR,KIAA1047,MGC104216,PPP1R109                      | nuclear receptor corepressor 1                                                         |
| NCOR2    | NM_006312.3    | SMRT,SMRTE,TRAC-1,CTG26,TNRC14                                                | nuclear receptor corepressor 2                                                         |
| NCR1     | NM_004829.5    | NK-p46,NKP46,CD335,LY94                                                       | natural cytotoxicity triggering receptor 1                                             |
| NEFL     | NM_006158.3    | NFL,CMT1F,CMT2E,NF68,PPP1R110                                                 | neurofilament light                                                                    |
| NFE2L2   | NM_006164.3    | NRF2                                                                          | nuclear factor, erythroid 2 like 2                                                     |
| NFKB1    | NM_003998.2    | KBF1,p105,NFKB-p50,p50,NF-kappaB,NFkappaB,NF-kB1                              | nuclear factor kappa B subunit 1                                                       |
| NFKB2    | NM_002502.2    | LYT-10,p52,p105,NF-kB2,p49/p100                                               | nuclear factor kappa B subunit 2                                                       |
| NFKBIA   | NM_020529.1    | IKBA,MAD-3,IkappaBalpha,NFKB1                                                 | NFKB inhibitor alpha                                                                   |
| NFKBIE   | NM_004556.2    | IKBE                                                                          | NFKB inhibitor epsilon                                                                 |
| NGF      | NM_002506.2    | NGFB                                                                          | nerve growth factor                                                                    |
| NGFR     | NM_002507.3    | TNFRSF16,CD271,p75NTR                                                         | nerve growth factor receptor                                                           |
| NINJ2    | NM_016533.4    |                                                                               | ninjurin 2                                                                             |
| NKG7     | NM_005601.3    | GIG1,GMP-17                                                                   | natural killer cell granule protein 7                                                  |
| NLGN1    | NM_014932.3    | KIAA1070                                                                      | neuroligin 1                                                                           |
| NLGN2    | NM_020795.2    | KIAA1366                                                                      | neuroligin 2                                                                           |
| NLRP3    | NM_001079821.2 | AGTAVPRL,Ail,AVP,FCAS,FCU,NALP3,PYPAF1,MWS,CLR1.1,C1orf7,CIAS1                | NLR family pyrin domain containing 3                                                   |
| NOD1     | NM_006092.2    | NLRCL,CLR7.1,CARD4                                                            | nucleotide binding oligomerization domain containing 1                                 |

|         |                |                                             |                                                                        |
|---------|----------------|---------------------------------------------|------------------------------------------------------------------------|
| NOSTRIN | NM_001039724.3 | MGC20702                                    | nitric oxide synthase trafficking                                      |
| NPL     | NM_001200056.1 | NPL1,DHDPS1,C1orf13                         | N-acetylnearminatase pyruvate lyase                                    |
| NPNT    | NM_001033047.2 | EGFL6L,POEM                                 | nephronectin                                                           |
| NPTX1   | NM_002522.3    |                                             | neuronal pentraxin 1                                                   |
| NQO1    | NM_000903.2    | DHQU,QR1,DTD,NMOR1,DIA4                     | NAD(P)H quinone dehydrogenase 1                                        |
| NRGN    | NM_006176.2    | RC3                                         | neurogranin                                                            |
| NRM     | NM_001270707.1 | NRM29                                       | nurim                                                                  |
| NRP2    | NM_003872.2    | VEGF165R2                                   | neuropilin 2                                                           |
| NTHL1   | NM_002528.5    | NTH1,OCTS3                                  | nth like DNA glycosylase 1                                             |
| NWD1    | NM_001007525.3 |                                             | NACHT and WD repeat domain containing 1                                |
| OAS1    | NM_001032409.1 | OIAS1,IFI-4,OIAS                            | 2'-5'-oligoadenylate synthetase 1                                      |
| OGG1    | NM_002542.5    | HMMH,HOGG1,OGH1,MUTM                        | 8-oxoguanine DNA glycosylase                                           |
| OLFML3  | NM_020190.2    | HNOEL-iso,OLF44                             | olfactomedin like 3                                                    |
| OPALIN  | NM_001040102.2 | TMP10,HTMP10,TMEM10                         | oligodendrocytic myelin paranodal and inner loop protein               |
| OPTN    | NM_001008211.1 | FIP2,HYPL,FIP-2,TFIIIA-INTP,NRP,HIP7,GLC1E  | optineurin                                                             |
| OSGIN1  | NM_013370.3    | BDGI,OKL38                                  | oxidative stress induced growth inhibitor 1                            |
| OSMR    | NM_003999.2    | OSMRB                                       | oncostatin M receptor                                                  |
| P2RX7   | NM_002562.5    | P2X7,MGC20089                               | purinergic receptor P2X 7                                              |
| P2RY12  | NM_022788.3    | P2Y12,SP1999,HORK3                          | purinergic receptor P2Y12                                              |
| PACSIN1 | NM_001199583.2 | SDPI                                        | protein kinase C and casein kinase substrate in neurons 1              |
| PADI2   | NM_007365.2    | KIAA0994,PDI2                               | peptidyl arginine deiminase 2                                          |
| PAK1    | NM_002576.3    |                                             | p21 (RAC1) activated kinase 1                                          |
| PARP1   | NM_001618.3    | PARP,PPOL,ADPRT                             | poly(ADP-ribose) polymerase 1                                          |
| PARP2   | NM_005484.3    | ADPRTL2                                     | poly(ADP-ribose) polymerase 2                                          |
| PCNA    | NM_002592.2    |                                             | proliferating cell nuclear antigen                                     |
| PDPN    | NM_006474.4    | T1A-2,Gp38,aggrus,GP40,PA2,26               | podoplanin                                                             |
| PECAM1  | NM_000442.3    | CD31                                        | platelet and endothelial cell adhesion molecule 1                      |
| PEX14   | NM_004565.2    |                                             | peroxisomal biogenesis factor 14                                       |
| PIK3CA  | NM_006218.2    | PI3K                                        | phosphatidylinositol-4,5-bisphosphate 3-kinase catalytic subunit alpha |
| PIK3CB  | NM_006219.1    | PIK3C1                                      | phosphatidylinositol-4,5-bisphosphate 3-kinase catalytic subunit beta  |
| PIK3CD  | NM_005026.3    | p110D                                       | phosphatidylinositol-4,5-bisphosphate 3-kinase catalytic subunit delta |
| PIK3CG  | NM_002649.2    |                                             | phosphatidylinositol-4,5-bisphosphate 3-kinase catalytic subunit gamma |
| PIK3R1  | NM_0181504.2   | GRB1,p85-ALPHA,p85                          | phosphoinositide-3-kinase regulatory subunit 1                         |
| PIK3R2  | NM_005027.2    | P85B,p85                                    | phosphoinositide-3-kinase regulatory subunit 2                         |
| PIK3R5  | NM_001142633.1 | P101-PI3K,p101                              | phosphoinositide-3-kinase regulatory subunit 5                         |
| PILRA   | NM_178273.1    | DFD03                                       | paired immunoglobulin like type 2 receptor alpha                       |
| PILRB   | NM_178238.1    | FDFACT1,FDFACT2                             | paired immunoglobulin-like type 2 receptor beta                        |
| PINK1   | NM_032409.2    | PARK6                                       | PTEN induced putative kinase 1                                         |
| PLA2G4A | NM_024420.2    | cPLA2-alpha,PLA2G4                          | phospholipase A2 group IVA                                             |
| PLA2G5  | NM_000929.2    |                                             | phospholipase A2 group V                                               |
| PLCG2   | NM_002661.2    |                                             | phospholipase C gamma 2                                                |
| PLD1    | NM_001130081.2 |                                             | phospholipase D1                                                       |
| PLD2    | NM_001243108.1 |                                             | phospholipase D2                                                       |
| PLEKHB1 | NM_021200.2    | PHR1,KPL1,PHRET1                            | pleckstrin homology domain containing B1                               |
| PLEKHM1 | NM_014798.2    | KIAA0356                                    | pleckstrin homology and RUN domain containing M1                       |
| PLLP    | NM_015993.2    | PMLP,TM4SF11                                | plasmalipin                                                            |
| PLP1    | NM_000533.3    | GPM6C,SPG2,PLP                              | proteolipid protein 1                                                  |
| PLXDC2  | NM_032812.7    | TEM7R,FLJ14623                              | plexin domain containing 2                                             |
| PLXNB3  | NM_001163257.1 | PLEXR,PLEXB3,PLXN6                          | plexin B3                                                              |
| PMP22   | NM_000304.3    | HNPP,GAS3,Sp110                             | peripheral myelin protein 22                                           |
| PMS2    | NR_003085.2    | H_DJ0042M02.9,HNPPCC4,MLH4,PMSL2            | PMS1 homolog 2, mismatch repair system component                       |
| PNOC    | NM_001284244.1 | PPNOC,N/OFG,NOP                             | prepronociceptin                                                       |
| POLE    | NM_006231.3    | POLE1                                       | DNA polymerase epsilon, catalytic subunit                              |
| PPF1A4  | NM_015053.1    |                                             | PTPRF interacting protein alpha 4                                      |
| PPP3CA  | NM_000944.4    | CNA1,PPP2B,CALN,CALNA                       | protein phosphatase 3 catalytic subunit alpha                          |
| PPP3CB  | NM_021132.2    | CALNA2,CNA2,PP2Bbeta,CALNB                  | protein phosphatase 3 catalytic subunit beta                           |
| PPP3R1  | NM_000945.3    | CALNB1,CNB,CNB1                             | protein phosphatase 3 regulatory subunit B, alpha                      |
| PPP3R2  | NM_147180.2    | PPP3RL                                      | protein phosphatase 3 regulatory subunit B, beta                       |
| PRDX1   | NM_002574.2    | NKEFA,PAGA                                  | peroxiredoxin 1                                                        |
| PRF1    | NM_005041.3    | PPF,P1,HPLH2                                | perforin 1                                                             |
| PRKACA  | NM_002730.3    | PKACa                                       | protein kinase cAMP-activated catalytic subunit alpha                  |
| PRKACB  | NM_182948.2    | PKACb                                       | protein kinase cAMP-activated catalytic subunit beta                   |
| PRKAR1A | NM_021247.1    | CNC1,PRKAR1,TSE1                            | protein kinase cAMP-dependent type I regulatory subunit alpha          |
| PRKAR2A | NM_004157.2    | PRKAR2                                      | protein kinase cAMP-dependent type II regulatory subunit alpha         |
| PRKAR2B | NM_002736.2    | PRKAR2                                      | protein kinase cAMP-dependent type II regulatory subunit beta          |
| PRKCE   | NM_005400.2    |                                             | protein kinase C epsilon                                               |
| PRKCO   | NM_006257.2    |                                             | protein kinase C theta                                                 |
| PRKDC   | NM_006904.6    | DNPK1,p350,DNAPK,XRCC7,DNA-PKcs,HYRC,HYRC1  | protein kinase, DNA-activated, catalytic polypeptide                   |
| PROS1   | NM_000313.1    | PROS                                        | protein S                                                              |
| PSEN2   | NM_000447.2    | AD3L,STM2,PS2,AD4                           | presenilin 2                                                           |
| PSMB8   | NM_004159.4    | RING10,D6S216E,PSMB5i,beta5i,LMP7           | proteasome subunit beta 8                                              |
| PTEN    | NM_000314.3    | MMAC1,TEP1,PTEN1,BZS,MHAM                   | phosphatase and tensin homolog                                         |
| PTGER3  | NM_000957.2    | EP3                                         | prostaglandin E receptor 3                                             |
| PTGER4  | NM_000958.2    | EP4                                         | prostaglandin E receptor 4                                             |
| PTGS2   | NM_000963.1    | COX2                                        | prostaglandin-endoperoxide synthase 2                                  |
| PTMS    | NM_002824.4    | ParaT                                       | parathyromin                                                           |
| PTPN6   | NM_002831.5    | HCP,HCPH,PTP-1C,SHP-1,SHP1                  | protein tyrosine phosphatase, non-receptor type 6                      |
| PTPRC   | NM_080923.2    | LCA,T200,GP180,CD45                         | protein tyrosine phosphatase, receptor type C                          |
| PTTG1   | NM_004219.2    | PTTG,HPTTG,EAP1,securin,TUTR1               | pituitary tumor-transforming 1                                         |
| PTX3    | NM_002852.3    | TSG-14,TNFAlP5                              | pentraxin 3                                                            |
| PYCARD  | NM_013258.3    | TMS-1,CARD5,ASC                             | PYD and CARD domain containing                                         |
| RAB6B   | NM_016577.3    |                                             | RAB6B, member RAS oncogene family                                      |
| RAB7A   | NM_004637.5    | RAB7                                        | RAB7A, member RAS oncogene family                                      |
| RAC1    | NM_006908.4    | TC-25,p21-Rac1,Rac-1                        | Rac family small GTPase 1                                              |
| RAC2    | NM_002872.4    | EN-7                                        | Rac family small GTPase 2                                              |
| RAD1    | NM_133377.2    | HRAD1,REC1                                  | RAD1 checkpoint DNA exonuclease                                        |
| RAD17   | NM_133338.1    | Rad24,RAD17Sp,CCYC                          | RAD17 checkpoint clamp loader component                                |
| RAD50   | NM_005732.2    | hRad50,RAD50-2                              | RAD50 double strand break repair protein                               |
| RAD51   | NM_133487.2    | HsRad51,HsT16930,BRCC5,FANCR,RAD51A,RECA    | RAD51 recombinase                                                      |
| RAD51B  | NM_002877.5    | REC2,hREC2,R51H2,RAD51L1                    | RAD51 paralog B                                                        |
| RAD51C  | NM_002876.2    | RAD51L2,FANCO                               | RAD51 paralog C                                                        |
| RAD9A   | NM_001243224.1 | RAD9                                        | RAD9 checkpoint clamp component A                                      |
| RAG1    | NM_000448.2    | RNF74,MGC43321                              | recombination activating 1                                             |
| RALA    | NM_005402.2    | RAL                                         | RAS like proto-oncogene A                                              |
| RALB    | NM_002881.2    |                                             | RAS like proto-oncogene B                                              |
| RAPGEF3 | NM_001098531.2 | cAMP-GEFI,EPAC,bcm910                       | Rap guanine nucleotide exchange factor 3                               |
| RB1CC1  | NM_001083617.1 | KIAA0203,Cc1,DRAGOU14,FIP200,ATG17,PPP1R131 | RB1 inducible coiled-coil 1                                            |
| RBFOX3  | NM_001082575.1 | FOX-3,NeuN,HRNBP3                           | RNA binding fox-1 homolog 3                                            |
| RELA    | NM_021975.3    | p65,NFKB3                                   | RELA proto-oncogene, NF-kB subunit                                     |
| RELB    | NM_006509.3    | REL-B                                       | RELB proto-oncogene, NF-kB subunit                                     |
| RELN    | NM_005045.2    | RL,PRO1598                                  | reelin                                                                 |
| RGL1    | NM_001297669.1 | RGL                                         | ral guanine nucleotide dissociation stimulator like 1                  |
| RHOA    | NM_001664.2    | RhoA,Rho12,RHOH12,ARH12,ARHA                | ras homolog family member A                                            |
| RIPK1   | NM_003804.3    | RIP                                         | receptor interacting serine/threonine kinase 1                         |
| RIPK2   | NM_003821.5    | RICK,RIP2,CARDIAK,CARD3                     | receptor interacting serine/threonine kinase 2                         |
| RNF8    | NM_003958.3    | KIAA0646                                    | ring finger protein 8                                                  |
| RPA1    | NM_002945.3    | REPA1,RPA70,HSSB,RF-A,RP-A                  | replication protein A1                                                 |
| RPL28   | NM_000991.3    | FLJ43307,L28                                | ribosomal protein L28                                                  |
| RPL29   | NM_000992.2    | HIP,HUMRPL29,L29,RPL29P10                   | ribosomal protein L29                                                  |
| RPL36AL | NM_001001.3    | RPL36A                                      | ribosomal protein L36a like                                            |
| RPL9    | NM_000661.4    | L9                                          | ribosomal protein L9                                                   |
| RPS10   | NM_001014.3    | MGC88819,S10                                | ribosomal protein S10                                                  |
| RPS2    | NM_002952.3    | LLREP3,S2                                   | ribosomal protein S2                                                   |
| RPS21   | NM_001024.3    | S21                                         | ribosomal protein S21                                                  |
| RPS3    | NM_001005.4    | FLJ26283,FLJ27450,MGC87870,S3               | ribosomal protein S3                                                   |
| RPS9    | NM_001013.3    | S9                                          | ribosomal protein S9                                                   |
| RRM2    | NM_001034.1    |                                             | ribonucleotide reductase regulatory subunit M2                         |
| RSAD2   | NM_080657.4    | cig5,viperin,viq1                           | radical S-adenosyl methionine domain containing 2                      |
| RTN4RL1 | NM_178568.2    | NGRH2,NgR3,DKFZp547J144                     | reticulon 4 receptor like 1                                            |
| S100A10 | NM_002966.1    | P11,42C,CLP11,ANX2LG,CAL1L                  | S100 calcium binding protein A10                                       |
| S100A12 | NM_005621.1    | p6,MRP6,CGRP,CAAF1,CAGC,ENRAGE              | S100 calcium binding protein A12                                       |
| S100B   | NM_006272.2    | S100beta                                    | S100 calcium binding protein B                                         |

|           |                |                                                                                        |                                                                                                   |
|-----------|----------------|----------------------------------------------------------------------------------------|---------------------------------------------------------------------------------------------------|
| S1PR3     | NM_005226.2    | EDG-3, EDG3                                                                            | sphingosine-1-phosphate receptor 3                                                                |
| S1PR4     | NM_003775.2    | EDG6                                                                                   | sphingosine-1-phosphate receptor 4                                                                |
| S1PR5     | NM_030760.3    | Edg-8, EDG8                                                                            | sphingosine-1-phosphate receptor 5                                                                |
| SALL1     | NM_002968.2    | Hsal1, ZNF794, TBS                                                                     | spalt like transcription factor 1                                                                 |
| SELL      | NR_029467.1    | LSEL, LAM1, LAM-1, hLHRc, Leu-8, Lyam-1, PLNHR, CD62L, LYAM1, LNHR                     | selectin L                                                                                        |
| SERPINA3  | NM_001085.4    | ACT, AACT                                                                              | serpin family A member 3                                                                          |
| SERPINE1  | NM_000602.4    | PAI, PLANH1, PAI1                                                                      | serpin family E member 1                                                                          |
| SERPINF1  | NM_002615.4    | EPC-1, PIG35, PEDF                                                                     | serpin family F member 1                                                                          |
| SERPING1  | NM_000062.2    | C11N, C1-INH, HAE1, HAE2, C1NH                                                         | serpin family G member 1                                                                          |
| SESN1     | NM_014454.2    | SEST1, PA26                                                                            | sestrin 1                                                                                         |
| SESN2     | NM_031459.3    | SE2, DKFZp761M0212, HI95, SEST2                                                        | sestrin 2                                                                                         |
| SETD1A    | NM_014712.1    | KIAA0339, Set1, KMT2F                                                                  | SET domain containing 1A                                                                          |
| SETD1B    | NM_015048.1    | KIAA1076, Set1B, KMT2G                                                                 | SET domain containing 1B                                                                          |
| SETD2     | NM_014159.6    | HYPB, HIF-1, KIAA1732, FLJ23184, KMT3A                                                 | SET domain containing 2                                                                           |
| SETD7     | NM_001306199.1 | KIAA1717, SET7, SET7/9, Set9, KMT7                                                     | SET domain containing lysine methyltransferase 7                                                  |
| SETDB1    | NM_001145415.1 | KG1T, KIAA0067, ESET, KMT1E, TDRD21                                                    | SET domain bifurcated 1                                                                           |
| SFTPD     | NM_003019.4    | SP-D, COLEC7, SFTP4                                                                    | surfactant protein D                                                                              |
| SH2D1A    | NM_002351.4    | XLP, MTC1, DSHP, XLPD, EBVS, SAP, IMD5, LYP                                            | SH2 domain containing 1A                                                                          |
| SHANK3    | NM_001080420.1 | SPANK-2, prosap2, KIAA1650, PSAP2                                                      | SH3 and multiple ankyrin repeat domains 3                                                         |
| SIGLEC1   | NM_023068.3    | SIGLEC-1, CD169, FLJ00051, FLJ00055, FLJ00073, FLJ32150, dJ1009E24.1, sialoadhesin, SN | sialic acid binding Ig like lectin 1                                                              |
| SIGLEC8   | NM_014442.2    | SIGLEC-8, SAF2, SIGLEC8L, MGC59785                                                     | sialic acid binding Ig like lectin 8                                                              |
| SIN3A     | NM_015477.1    | KIAA0700, DKFZP434K235                                                                 | SIN3 transcription regulator family member A                                                      |
| SIRT1     | NM_012238.4    | SIRT1                                                                                  | sirtuin 1                                                                                         |
| SLAMF8    | NM_020125.2    | BLAME, SBB142, CD353                                                                   | SLAM family member 8                                                                              |
| SLAMF9    | NM_001146173.1 | CD2F-10, CD84-H1, SF2001                                                               | SLAM family member 9                                                                              |
| SLC10A6   | NM_019795.2    | SOAT                                                                                   | solute carrier family 10 member 6                                                                 |
| SLC17A6   | NM_020346.2    | DNPI, VGLUT2                                                                           | solute carrier family 17 member 6                                                                 |
| SLC17A7   | NM_020309.2    | BNPI, VGLUT1                                                                           | solute carrier family 17 member 7                                                                 |
| SLC1A3    | NM_004172.4    | EAAT1, GLAST, EA6                                                                      | solute carrier family 1 member 3                                                                  |
| SLC2A1    | NM_006516.2    | DYT18, DYT9, GLUT1, GLUT, HTLVR, CSE                                                   | solute carrier family 2 member 1                                                                  |
| SLC2A5    | NM_003039.2    | GLUT5                                                                                  | solute carrier family 2 member 5                                                                  |
| SLC44A1   | NM_001286730.1 | CDw92, CTL1, CHTL1, CD92, CDW92                                                        | solute carrier family 44 member 1                                                                 |
| SLC6A1    | NM_003042.3    | GAT1, GABATR, GABATHG                                                                  | solute carrier family 6 member 1                                                                  |
| SLCO2B1   | NM_001145212.2 | OATP-B, OATP2B1, SLC21A9                                                               | solute carrier organic anion transporter family member 2B1                                        |
| SLFN11    | NM_001104587.1 | FLJ34922                                                                               | schlafen family member 11                                                                         |
| SMARCA4   | NM_001128849.1 | hSNF2b, BRG1, BAF190, SNF2, SWI2, SNF2-BETA, SNF2L, FLJ39786, SNF2L4                   | SWI/SNF related, matrix associated, actin dependent regulator of chromatin, subfamily a, member 4 |
| SMARCA5   | NM_003601.2    | hSNF2H, hISWI, ISWI                                                                    | SWI/SNF related, matrix associated, actin dependent regulator of chromatin, subfamily a, member 5 |
| SMARCD1   | NM_003076.4    | BAF60A, Rsc6p, CRACD1                                                                  | SWI/SNF related, matrix associated, actin dependent regulator of chromatin, subfamily d, member 1 |
| SMC1A     | NM_006306.2    | DXS423E, KIAA0178, SB1.8, Smbc, SMC1L1                                                 | structural maintenance of chromosomes 1A                                                          |
| SNCA      | NM_000345.2    | NACP, PD1, PARK1, PARK4                                                                | synuclein alpha                                                                                   |
| SOCS3     | NM_003955.3    | SSI-3, CIS3, SOCS-3, Cish3                                                             | suppressor of cytokine signaling 3                                                                |
| SOD2      | NM_000636.2    |                                                                                        | superoxide dismutase 2                                                                            |
| SOX10     | NM_006941.3    | DOM, WS4, WS2E                                                                         | SRY-box 10                                                                                        |
| SOX4      | NM_003107.2    |                                                                                        | SRY-box 4                                                                                         |
| SOX9      | NM_000346.2    | SRA1, CMD1, CMPD1                                                                      | SRY-box 9                                                                                         |
| SPHK1     | NM_021972.2    | SPHK                                                                                   | sphingosine kinase 1                                                                              |
| SPIB      | NM_003121.3    | SPI-B                                                                                  | Spi-B transcription factor                                                                        |
| SPINT1    | NM_001032367.1 | HAI, MANSC2                                                                            | serine peptidase inhibitor, Kunitz type 1                                                         |
| SPP1      | NM_000582.2    | BSPI, ETA-1, BNSP, OPN                                                                 | secreted phosphoprotein 1                                                                         |
| SQSTM1    | NM_003900.3    | p62, p60, p62B, A170, PDB3, OSIL                                                       | sequestosome 1                                                                                    |
| SRGN      | NR_036430.1    | PPG, PRG, PRG1                                                                         | serglycin                                                                                         |
| SRXN1     | NM_080725.1    | Npn3, SRX1, YKL086W, dJ850E9.2, C20orf139                                              | sulfiredoxin 1                                                                                    |
| ST3GAL6   | NM_006100.2    | ST3GALVI, SIAT10                                                                       | ST3 beta-galactoside alpha-2,3-sialyltransferase 6                                                |
| ST8SIA6   | NM_001004470.1 | SIAT8F                                                                                 | ST8 alpha-N-acetyl-neuraminidase alpha-2,8-sialyltransferase 6                                    |
| STAT1     | NM_0139266.1   | STAT91, ISGF-3                                                                         | signal transducer and activator of transcription 1                                                |
| STEA4P    | NM_024636.2    | FLJ23153, TIARP, STAMP2, SchLAH, TNFAIP9                                               | STEA4P metalloredutase                                                                            |
| STMN1     | NM_020401.1    | SMN, OP18, PR22, PP19, PP17, Lag, FLJ32206, LAP18, C1orf215                            | stathmin 1                                                                                        |
| STX18     | NM_016930.2    | Ufe1                                                                                   | syntaxin 18                                                                                       |
| SUMO1     | NM_003352.4    | PIC1, GMP1, SMT3C, SUMO-1, SMT3H3, OFC10, UBL1                                         | small ubiquitin-like modifier 1                                                                   |
| SUV39H1   | NM_003173.2    | KMT1A, SUV39H                                                                          | suppressor of variegation 3-9 homolog 1                                                           |
| SUV39H2   | NM_024670.3    | FLJ23414, KMT1B                                                                        | suppressor of variegation 3-9 homolog 2                                                           |
| SUZ12     | NM_015355.2    | JJAZ1, KIAA0160, CHET9                                                                 | SUZ12 polycomb repressive complex 2 subunit                                                       |
| SYK       | NM_003177.5    |                                                                                        | spleen associated tyrosine kinase                                                                 |
| SYN2      | NM_003178.5    | SYNII, SYNIIa, SYNIIb                                                                  | synapsin II                                                                                       |
| SYP       | NM_003179.2    | MRX96                                                                                  | synapophysin                                                                                      |
| TARBP2    | NM_134324.2    | Trbp                                                                                   | TARBP2, RISC loading complex RNA binding subunit                                                  |
| TBC1D4    | NM_014832.2    | KIAA0603, AS160, DKFZp779C0666                                                         | TBC1 domain family member 4                                                                       |
| TBR1      | NM_006593.2    |                                                                                        | T-box, brain 1                                                                                    |
| TBX21     | NM_013351.1    | TBLYM, T-bet                                                                           | T-box 21                                                                                          |
| TCIRG1    | NM_006053.2    | TIRC7, OC-116, OC116, ATP6N1C, Atp6i, a3, ATP6V0A3                                     | T-cell immune regulator 1, ATPase H+ transporting V0 subunit a3                                   |
| TCL1A     | NR_049726.1    | TCL1                                                                                   | T-cell leukemia/lymphoma 1A                                                                       |
| TET1      | NM_030625.2    | LCX, KIAA1676, bA119F7.1, CXXC6                                                        | tet methylcytosine dioxygenase 1                                                                  |
| TFG       | NM_001007565.1 | TF6, FLJ36137, SPG57                                                                   | TRK-fused gene                                                                                    |
| TGFA      | NM_00109691.1  |                                                                                        | transforming growth factor alpha                                                                  |
| TGFB1     | NM_000660.3    | CED, TGFbeta, TGFB, DPD1                                                               | transforming growth factor beta 1                                                                 |
| TGFBRI1   | NM_004612.2    | ALK-5, ACVRLK4, ALK5, MSSE, ESS1                                                       | transforming growth factor beta receptor 1                                                        |
| TGM1      | NM_000359.2    | TGASE, TGK, LI, LI1, ICR2                                                              | transglutaminase 1                                                                                |
| TGM2      | NM_004613.2    | TGC                                                                                    | transglutaminase 2                                                                                |
| TIE1      | NM_005424.2    | JTK14, TIE                                                                             | tyrosine kinase with immunoglobulin like and EGF like domains 1                                   |
| TIMELESS  | NM_003920.2    | hTIM, TIM, TIM1                                                                        | timeless circadian regulator                                                                      |
| TIMP1     | NM_003254.2    | EPO, TIMP, CLGI                                                                        | TIMP metalloproteinase inhibitor 1                                                                |
| TLE3      | NM_001105192.1 | ESG, ESG3, KIAA1547, Hst18976, GRG3                                                    | transducin like enhancer of split 3                                                               |
| TLR2      | NM_003264.3    | TIL4, CD282                                                                            | toll like receptor 2                                                                              |
| TLR4      | NM_138554.2    | hToll, CD284, TLR-4, ARMD10                                                            | toll like receptor 4                                                                              |
| TLR7      | NM_016562.3    |                                                                                        | toll like receptor 7                                                                              |
| TM4SF1    | NM_014220.2    | L6, M3S1                                                                               | transmembrane 4 L six family member 1                                                             |
| TMCF7     | NM_001324265.1 | FLJ21240                                                                               | transmembrane channel like 7                                                                      |
| TMCC3     | NM_020698.2    | KIAA1145                                                                               | transmembrane and coiled-coil domain family 3                                                     |
| TMEM100   | NM_018286.2    | FLJ10970, FLJ37856                                                                     | transmembrane protein 100                                                                         |
| TMEM119   | NM_181724.2    |                                                                                        | transmembrane protein 119                                                                         |
| TMEM144   | NM_018342.4    | FLJ11155                                                                               | transmembrane protein 144                                                                         |
| TMEM173   | NM_198282.1    | FLJ38577, NET23, ERIS, MPYS, STING, MITA                                               | transmembrane protein 173                                                                         |
| TMEM204   | NM_024600.4    | FLJ20898, CLP24, C16orf30                                                              | transmembrane protein 204                                                                         |
| TMEM206   | NM_018252.2    | FLJ10874, C1orf75                                                                      | transmembrane protein 206                                                                         |
| TMEM37    | NM_183240.2    | PR1, PR                                                                                | transmembrane protein 37                                                                          |
| TMEM64    | NM_001008495.3 | DKFZp762C1112                                                                          | transmembrane protein 64                                                                          |
| TMEM88B   | NM_001146685.1 |                                                                                        | transmembrane protein 88B                                                                         |
| TNF       | NM_000594.2    | TNFSF2, DIF, TNF-alpha, TNFA                                                           | tumor necrosis factor                                                                             |
| TNFRSF10B | NM_003842.3    | DR5, KILLER, TRICK2A, TRAIL-R2, TRICKB, CD262                                          | TNF receptor superfamily member 10b                                                               |
| TNFRSF11B | NM_002546.2    | OCIF, TR1, OPG                                                                         | TNF receptor superfamily member 11b                                                               |
| TNFRSF12A | NM_016639.1    | FN14, TweakR, CD266                                                                    | TNF receptor superfamily member 12A                                                               |
| TNFRSF13C | NM_052945.3    | BAFFR, CD268                                                                           | TNF receptor superfamily member 13C                                                               |
| TNFRSF17  | NM_001192.2    | BCM, CD269, TNFRSF13A, BCMA                                                            | TNF receptor superfamily member 17                                                                |
| TNFRSF1A  | NM_001065.2    | TNF-R, TNFAR, TNFR80, TNF-R-1, CD120a, TNF-R55, TNFR1                                  | TNF receptor superfamily member 1A                                                                |
| TNFRSF1B  | NM_001066.2    | TNFR, TNFR80, TNF-R75, TNF-R-ii, p75, CD120b, TNFR2                                    | TNF receptor superfamily member 1B                                                                |
| TNFRSF25  | NM_001039664.1 | DR3, TRAMP, WSL-1, LARD, WSL-LR, DDR3, TR3, APO-3, TNFRSF12                            | TNF receptor superfamily member 25                                                                |
| TNFRSF4   | NM_003327.3    | ACT35, OX40, CD134, TXGP1L                                                             | TNF receptor superfamily member 4                                                                 |
| TNFSF10   | NM_003810.2    | TRAIL, Apo-2L, TL2, CD253                                                              | TNF superfamily member 10                                                                         |
| TNFSF12   | NM_003809.2    | TWEAK, DR3L, APO3L                                                                     | TNF superfamily member 12                                                                         |
| TNFSF13B  | NM_001145645.2 | BAFF, THANK, BLYS, TALL-1, TALL1, CD257, TNFSF20                                       | TNF superfamily member 13b                                                                        |
| TNFSF4    | NM_003326.2    | OX-40L, ap34, CD252, TXGP1                                                             | TNF superfamily member 4                                                                          |
| TNFSF8    | NM_001244.3    | CD153, CD30LG                                                                          | TNF superfamily member 8                                                                          |
| TOP2A     | NM_001067.3    | TOP2                                                                                   | DNA topoisomerase II alpha                                                                        |
| TOPBP1    | NM_007027.3    | KIAA0259, TOP2BP1                                                                      | DNA topoisomerase II binding protein 1                                                            |
| TP53      | NM_000546.2    | p53, LFS1                                                                              | tumor protein p53                                                                                 |
| TP53BP2   | NM_001031685.2 | PPP1R13A, ASPP2, 53BP2                                                                 | tumor protein p53 binding protein 2                                                               |
| TP73      | NM_005427.2    | P73                                                                                    | tumor protein p73                                                                                 |
| TPD52     | NM_005079.2    | D52, hd52, N8L                                                                         | tumor protein D52                                                                                 |

|                           |                |                                            |                                                                        |
|---------------------------|----------------|--------------------------------------------|------------------------------------------------------------------------|
| TPSB2                     | NM_024164.5    |                                            | tryptase beta 2 (gene/pseudogene)                                      |
| TRADD                     | NM_003789.2    | Hs.89862                                   | TNFRSF1A associated via death domain                                   |
| TRAF1                     | NM_005658.3    | EBI6                                       | TNF receptor associated factor 1                                       |
| TRAF2                     | NM_021138.3    | TRAP3                                      | TNF receptor associated factor 2                                       |
| TRAF3                     | NM_145725.2    | CAP-1,CD40bp,CRAF1,LAP1                    | TNF receptor associated factor 3                                       |
| TRAF6                     | NM_145803.2    | RNF85                                      | TNF receptor associated factor 6                                       |
| TRAT1                     | NM_016388.2    | HSPC062,TRIM,TCRIM                         | T-cell receptor associated transmembrane adaptor 1                     |
| TREM1                     | NM_001242589.1 | TREM-1,CD354                               | triggering receptor expressed on myeloid cells 1                       |
| TREM2                     | NM_018965.3    | TREM-2,Trem2a,Trem2b,Trem2c                | triggering receptor expressed on myeloid cells 2                       |
| TRIM47                    | NM_033452.2    | GOA,RNF100                                 | tripartite motif containing 47                                         |
| TRPA1                     | NM_007332.2    | ANKTM1                                     | transient receptor potential cation channel subfamily A member 1       |
| TRPM4                     | NM_001195227.1 | FLJ20041                                   | transient receptor potential cation channel subfamily M member 4       |
| TPSPAN18                  | NM_130783.4    | TPSPAN                                     | tetraspanin 18                                                         |
| TTR                       | NM_000371.3    | HsT2651,CTS,PALB,CTS1                      | transthyretin                                                          |
| TUBB3                     | NM_006086.2    | beta-4,CFEOM3,CFEOM3A,FEOM3                | tubulin beta 3 class III                                               |
| TUBB4A                    | NM_006087.2    | beta-5,TUBB4,DYT4                          | tubulin beta 4A class IVa                                              |
| TXNRD1                    | NM_001093771.1 | TXNR,GRIM-12,Trxr1                         | thioredoxin reductase 1                                                |
| TYROBP                    | NM_003332.3    | DAP12,PLO-SL,KARAP,PLOSL                   | TYRO protein tyrosine kinase binding protein                           |
| UGT8                      | NM_001128174.1 | CGT                                        | UDP glycosyltransferase 8                                              |
| ULK1                      | NM_003565.1    | ATG1,ATG1A                                 | unc-51 like autophagy activating kinase 1                              |
| UNG                       | NM_003362.3    | UDG,UNG1,UNG2,HIGM4,DGU                    | uracil DNA glycosylase                                                 |
| UTY                       | NM_007125.3    | KDM6AL,KDM6C                               | ubiquitously transcribed tetratricopeptide repeat containing, Y-linked |
| VAMP7                     | NM_005638.5    | VAMP-7,TI-VAMP,SYBL1                       | vesicle associated membrane protein 7                                  |
| VAV1                      | NM_005428.2    | VAV                                        | vav guanine nucleotide exchange factor 1                               |
| VEGFA                     | NM_001025366.1 | VEGF-A,VPF,VEGF                            | vascular endothelial growth factor A                                   |
| VIM                       | NM_003380.2    |                                            | vimentin                                                               |
| VPS4A                     | NM_013245.2    | VPS4,VPS4-1,FLJ22197,SKD2,SKD1,SKD1A       | vacuolar protein sorting 4 homolog A                                   |
| VPS4B                     | NM_004869.3    | VPS4-2,SKD1B,SKD1                          | vacuolar protein sorting 4 homolog B                                   |
| WAS                       | NM_000377.2    | WASP,WASPA,IMD2,THC                        | Wiskott-Aldrich syndrome                                               |
| WDR5                      | NM_017588.2    | SWD3,CFAP89                                | WD repeat domain 5                                                     |
| XCL1                      | NM_002995.2    | LPTN,ATAC,SCM-1a,SCM-1,LTN,SCYC1           | X-C motif chemokine ligand 1                                           |
| XIAP                      | NM_001167.3    | hiLP,API3,BIRC4                            | X-linked inhibitor of apoptosis                                        |
| XRCC6                     | NM_001469.3    | D22S731,D22S671,KU70,ML8,G22P1             | X-ray repair cross complementing 6                                     |
| ZBP1                      | NM_001160419.2 | dJ718J7.3,DLM1,DLM-1,DAI,C20orf183         | Z-DNA binding protein 1                                                |
| ZNF367                    | NM_153695.2    | FLJ33970                                   | zinc finger protein 367                                                |
| <b>Housekeeping Genes</b> |                |                                            |                                                                        |
| AARS                      | NM_001605.2    | CMT2N,AlaRS                                | alanyl-tRNA synthetase                                                 |
| ASB7                      | NM_024708.3    |                                            | ankyrin repeat and SOCS box containing 7                               |
| CCDC127                   | NM_145265.2    | FLJ25701                                   | coiled-coil domain containing 127                                      |
| CNOT10                    | NM_001256741.1 | FLJ12890,FLJ13165                          | CCR4-NOT transcription complex subunit 10                              |
| CSNK2A2                   | NM_001896.2    | CSNK2A1,CK2alpha'                          | casein kinase 2 alpha 2                                                |
| FAM104A                   | NM_032837.2    | FLJ14775                                   | family with sequence similarity 104 member A                           |
| GUSB                      | NM_000181.3    |                                            | glucuronidase beta                                                     |
| LARS                      | NM_020117.9    | HSPC192,FLJ10595,FLJ21788,LARS1,LEUS,RNTLS | leucyl-tRNA synthetase                                                 |
| MTO1                      | NM_133845.2    |                                            | mitochondrial tRNA translation optimization 1                          |
| SUPT7L                    | NM_014860.2    | STAF65gamma,KIAA0764,SPT7L,STAF65          | SPT7 like, STAGA complex gamma subunit                                 |
| TADA2B                    | NM_152293.2    | MGC21874                                   | transcriptional adaptor 2B                                             |
| TBP                       | NM_001172085.1 | TFIID,GTF2D1,SCA17                         | TATA-box binding protein                                               |
| XPNPEP1                   | NR_030724.1    | XPNPEP,XPNPEPL1,XPNPEPL                    | X-prolyl aminopeptidase 1                                              |
