# Supplementary figures and images for: Association between microenvironment‐related genes and prognosis of primary central nervous system lymphoma
Source: PubMed Central journal article supplement — EJHaem. 2024 Nov 14;5(6):1201–14. doi: 10.1002/jha2.1046 (PMC11647707; doi:10.1002/jha2.1046), 2024-11-14

# Supplementary Figure 1. Ingenuity pathway analysis (IPA) of 45 genes up-regulated in WP group.

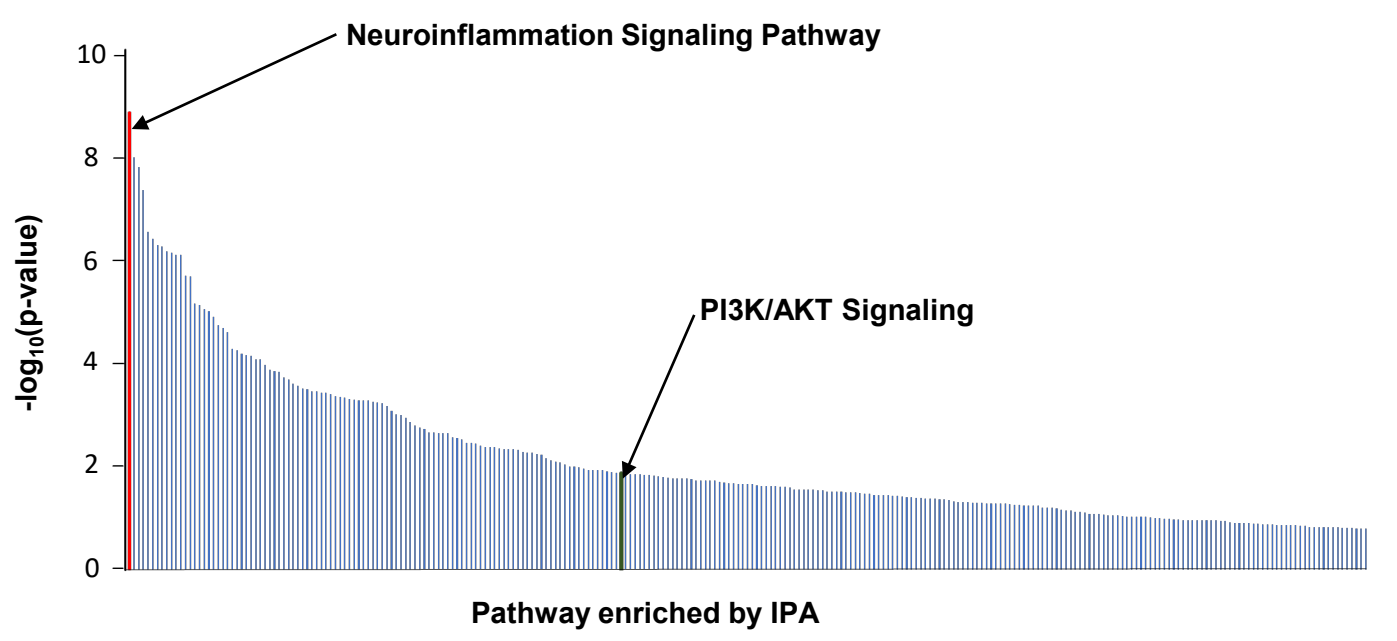

Supplement: JHA2-5-1201-s003.pdf [file JHA2-5-1201-s003.pdf]
